# Supplementary material
Source: publisher site journal article supplement (https://bdj.pensoft.net/lib/ajax_srv/article_elements_srv.php?action=download_suppl_file&instance_id=748252)
Supplement: Supplementary file [file article_elements_srv.php]

Jun 1, 2013 - Jun 1, 2014

# Devices

All Sessions  
3.68%

+ Add Segment

Explorer

Summary

Sessions

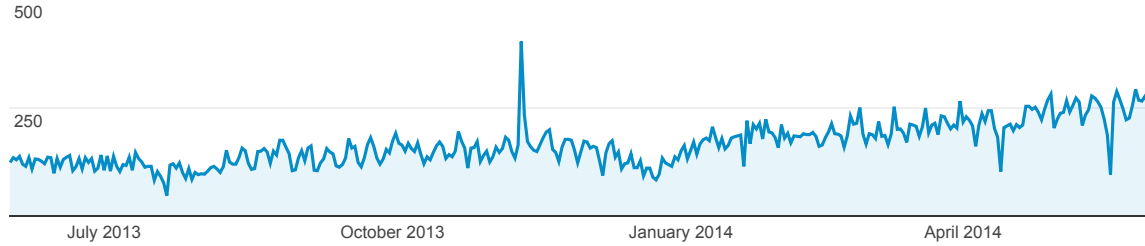

| Mobile Device Info                      | Acquisition                                                       |                                                                |                                                                 | Behavior                                                      |                                                             |                                                                    | Conversions                                                |                                                  |                                                            |
|-----------------------------------------|-------------------------------------------------------------------|----------------------------------------------------------------|-----------------------------------------------------------------|---------------------------------------------------------------|-------------------------------------------------------------|--------------------------------------------------------------------|------------------------------------------------------------|--------------------------------------------------|------------------------------------------------------------|
|                                         | Sessions                                                          | % New Sessions                                                 | New Users                                                       | Bounce Rate                                                   | Pages / Session                                             | Avg. Session Duration                                              | Goal Conversion Rate                                       | Goal Completions                                 | Goal Value                                                 |
|                                         | <b>60,369</b><br><small>% of Total: 3.68%<br/>(1,638,764)</small> | <b>69.05%</b><br><small>Site Avg: 33.60%<br/>(105.48%)</small> | <b>41,686</b><br><small>% of Total: 7.57%<br/>(550,703)</small> | <b>62.48%</b><br><small>Site Avg: 33.01%<br/>(89.29%)</small> | <b>3.73</b><br><small>Site Avg: 11.32<br/>(-67.06%)</small> | <b>00:03:02</b><br><small>Site Avg: 00:12:07<br/>(-75.01%)</small> | <b>0.00%</b><br><small>Site Avg: 0.00%<br/>(0.00%)</small> | <b>0</b><br><small>% of Total: 0.00% (0)</small> | <b>\$0.00</b><br><small>% of Total: 0.00% (\$0.00)</small> |
| 1. Apple iPad                           | <b>17,305</b> (28.67%)                                            | 67.37%                                                         | 11,659 (27.97%)                                                 | 61.47%                                                        | 4.22                                                        | 00:02:51                                                           | 0.00%                                                      | 0 (0.00%)                                        | \$0.00 (0.00%)                                             |
| 2. Apple iPhone                         | <b>9,707</b> (16.08%)                                             | 72.37%                                                         | 7,025 (16.85%)                                                  | 65.50%                                                        | 2.81                                                        | 00:02:10                                                           | 0.00%                                                      | 0 (0.00%)                                        | \$0.00 (0.00%)                                             |
| 3. (not set)                            | <b>6,953</b> (11.52%)                                             | 77.15%                                                         | 5,364 (12.87%)                                                  | 65.91%                                                        | 2.87                                                        | 00:02:39                                                           | 0.00%                                                      | 0 (0.00%)                                        | \$0.00 (0.00%)                                             |
| 4. Samsung GT-I9300 Galaxy S III        | <b>826</b> (1.37%)                                                | 63.68%                                                         | 526 (1.26%)                                                     | 65.74%                                                        | 3.22                                                        | 00:02:21                                                           | 0.00%                                                      | 0 (0.00%)                                        | \$0.00 (0.00%)                                             |
| 5. Apple iPod                           | <b>670</b> (1.11%)                                                | 62.54%                                                         | 419 (1.01%)                                                     | 57.31%                                                        | 3.02                                                        | 00:02:17                                                           | 0.00%                                                      | 0 (0.00%)                                        | \$0.00 (0.00%)                                             |
| 6. Opera Opera Mini for S60             | <b>437</b> (0.72%)                                                | 77.57%                                                         | 339 (0.81%)                                                     | 68.88%                                                        | 2.33                                                        | 00:01:51                                                           | 0.00%                                                      | 0 (0.00%)                                        | \$0.00 (0.00%)                                             |
| 7. Samsung GT-I9100 Galaxy S II         | <b>424</b> (0.70%)                                                | 74.53%                                                         | 316 (0.76%)                                                     | 67.45%                                                        | 3.06                                                        | 00:01:45                                                           | 0.00%                                                      | 0 (0.00%)                                        | \$0.00 (0.00%)                                             |
| 8. Google Nexus 7                       | <b>414</b> (0.69%)                                                | 72.22%                                                         | 299 (0.72%)                                                     | 68.12%                                                        | 2.93                                                        | 00:01:43                                                           | 0.00%                                                      | 0 (0.00%)                                        | \$0.00 (0.00%)                                             |
| 9. Samsung GT-I9500 Galaxy S IV         | <b>386</b> (0.64%)                                                | 81.87%                                                         | 316 (0.76%)                                                     | 68.13%                                                        | 2.43                                                        | 00:01:39                                                           | 0.00%                                                      | 0 (0.00%)                                        | \$0.00 (0.00%)                                             |
| 10. Samsung GT-I8190L Galaxy S III Mini | <b>374</b> (0.62%)                                                | 63.90%                                                         | 239 (0.57%)                                                     | 50.27%                                                        | 4.47                                                        | 00:04:13                                                           | 0.00%                                                      | 0 (0.00%)                                        | \$0.00 (0.00%)                                             |
| 11. Samsung GT-N7100 Galaxy Note II     | <b>366</b> (0.61%)                                                | 69.67%                                                         | 255 (0.61%)                                                     | 66.12%                                                        | 3.04                                                        | 00:02:10                                                           | 0.00%                                                      | 0 (0.00%)                                        | \$0.00 (0.00%)                                             |
| 12. Samsung SHV-E160S Galaxy Note       | <b>364</b> (0.60%)                                                | 2.20%                                                          | 8 (0.02%)                                                       | 31.32%                                                        | 4.32                                                        | 00:04:24                                                           | 0.00%                                                      | 0 (0.00%)                                        | \$0.00 (0.00%)                                             |
| 13. Samsung GT-N5100 Galaxy Note 8.0    | <b>353</b> (0.58%)                                                | 17.28%                                                         | 61 (0.15%)                                                      | 31.44%                                                        | 32.93                                                       | 00:25:50                                                           | 0.00%                                                      | 0 (0.00%)                                        | \$0.00 (0.00%)                                             |
| 14. Samsung GT-P5110 Galaxy Tab 2 10.1  | <b>340</b> (0.56%)                                                | 59.12%                                                         | 201 (0.48%)                                                     | 62.35%                                                        | 3.57                                                        | 00:03:09                                                           | 0.00%                                                      | 0 (0.00%)                                        | \$0.00 (0.00%)                                             |

| Global Mobile Device Performance & Sales Report - Q3 2023 |                                       |                   |                  |               |                  |                 |                  |                  |                 |                 |   |         |        |         |
|-----------------------------------------------------------|---------------------------------------|-------------------|------------------|---------------|------------------|-----------------|------------------|------------------|-----------------|-----------------|---|---------|--------|---------|
| Rank                                                      | Device Model                          | Sales Performance |                  |               | Usage Metrics    |                 |                  | Operational Data |                 |                 |   |         |        |         |
|                                                           |                                       | Units Sold        | Market Share (%) | Revenue (\$M) | Active Users (M) | Screen Time (h) | Battery Life (h) | Crash Rate (%)   | Support Tickets | Warranty Claims |   |         |        |         |
| 15.                                                       | Samsung GT-P5113 Galaxy Tab 2 10.1    | 319               | (0.53%)          | 14.42%        | 46               | (0.11%)         | 28.84%           | 14.22            | 00:19:37        | 0.00%           | 0 | (0.00%) | \$0.00 | (0.00%) |
| 16.                                                       | Samsung GT-P3110 Galaxy Tab 2 7.0     | 315               | (0.52%)          | 46.67%        | 147              | (0.35%)         | 43.81%           | 4.90             | 00:05:01        | 0.00%           | 0 | (0.00%) | \$0.00 | (0.00%) |
| 17.                                                       | Nokia Lumia 520                       | 299               | (0.50%)          | 71.57%        | 214              | (0.51%)         | 52.84%           | 4.15             | 00:02:40        | 0.00%           | 0 | (0.00%) | \$0.00 | (0.00%) |
| 18.                                                       | Samsung GT-I9300 Galaxy SIII          | 276               | (0.46%)          | 76.81%        | 212              | (0.51%)         | 69.93%           | 3.00             | 00:02:24        | 0.00%           | 0 | (0.00%) | \$0.00 | (0.00%) |
| 19.                                                       | Samsung GT-N8000 Galaxy Note 10.1     | 269               | (0.45%)          | 53.90%        | 145              | (0.35%)         | 52.42%           | 4.78             | 00:03:31        | 0.00%           | 0 | (0.00%) | \$0.00 | (0.00%) |
| 20.                                                       | Samsung GT-P3100 Galaxy Tab 2 7.0     | 253               | (0.42%)          | 66.01%        | 167              | (0.40%)         | 50.59%           | 4.77             | 00:05:58        | 0.00%           | 0 | (0.00%) | \$0.00 | (0.00%) |
| 21.                                                       | Samsung GT-I9505 Galaxy S IV          | 251               | (0.42%)          | 88.45%        | 222              | (0.53%)         | 77.29%           | 1.83             | 00:00:41        | 0.00%           | 0 | (0.00%) | \$0.00 | (0.00%) |
| 22.                                                       | Samsung GT-P5100 Galaxy Tab 2 10.1    | 223               | (0.37%)          | 67.71%        | 151              | (0.36%)         | 56.95%           | 3.88             | 00:03:49        | 0.00%           | 0 | (0.00%) | \$0.00 | (0.00%) |
| 23.                                                       | Samsung GT-C3322i Metro Duos          | 215               | (0.36%)          | 84.65%        | 182              | (0.44%)         | 71.63%           | 1.96             | 00:01:34        | 0.00%           | 0 | (0.00%) | \$0.00 | (0.00%) |
| 24.                                                       | LG P768 Optimus L9                    | 210               | (0.35%)          | 19.05%        | 40               | (0.10%)         | 61.43%           | 2.40             | 00:02:25        | 0.00%           | 0 | (0.00%) | \$0.00 | (0.00%) |
| 25.                                                       | Samsung GT-P3113 Galaxy Tab 2 7.0     | 185               | (0.31%)          | 33.51%        | 62               | (0.15%)         | 67.03%           | 2.25             | 00:03:17        | 0.00%           | 0 | (0.00%) | \$0.00 | (0.00%) |
| 26.                                                       | Samsung GT-I8190 Galaxy S III Mini    | 184               | (0.30%)          | 72.83%        | 134              | (0.32%)         | 62.50%           | 3.03             | 00:02:29        | 0.00%           | 0 | (0.00%) | \$0.00 | (0.00%) |
| 27.                                                       | Samsung GT-S5830M Galaxy Ace          | 178               | (0.29%)          | 61.24%        | 109              | (0.26%)         | 45.51%           | 7.27             | 00:07:33        | 0.00%           | 0 | (0.00%) | \$0.00 | (0.00%) |
| 28.                                                       | Samsung GT-N8010 Galaxy Note 10.1     | 177               | (0.29%)          | 67.23%        | 119              | (0.29%)         | 72.88%           | 3.05             | 00:02:14        | 0.00%           | 0 | (0.00%) | \$0.00 | (0.00%) |
| 29.                                                       | Alcatel OT-960C One Touch 960C        | 170               | (0.28%)          | 3.53%         | 6                | (0.01%)         | 85.88%           | 1.22             | 00:00:13        | 0.00%           | 0 | (0.00%) | \$0.00 | (0.00%) |
| 30.                                                       | Google Nexus 4                        | 164               | (0.27%)          | 57.32%        | 94               | (0.23%)         | 60.37%           | 3.24             | 00:02:20        | 0.00%           | 0 | (0.00%) | \$0.00 | (0.00%) |
| 31.                                                       | BlackBerry 9320 BlackBerry Curve 9320 | 161               | (0.27%)          | 80.12%        | 129              | (0.31%)         | 58.39%           | 3.61             | 00:05:40        | 0.00%           | 0 | (0.00%) | \$0.00 | (0.00%) |
| 32.                                                       | LG E612g Optimus L5                   | 161               | (0.27%)          | 12.42%        | 20               | (0.05%)         | 34.16%           | 7.50             | 00:04:43        | 0.00%           | 0 | (0.00%) | \$0.00 | (0.00%) |
| 33.                                                       | Samsung GT-P5210 Galaxy Tab 3 10.1    | 152               | (0.25%)          | 68.42%        | 104              | (0.25%)         | 63.16%           | 5.66             | 00:04:58        | 0.00%           | 0 | (0.00%) | \$0.00 | (0.00%) |
| 34.                                                       | Spice M6800 Flo                       | 148               | (0.25%)          | 85.81%        | 127              | (0.30%)         | 66.89%           | 2.20             | 00:01:56        | 0.00%           | 0 | (0.00%) | \$0.00 | (0.00%) |
| 35.                                                       | Samsung GT-E2200                      | 136               | (0.23%)          | 78.68%        | 107              | (0.26%)         | 64.71%           | 3.01             | 00:03:04        | 0.00%           | 0 | (0.00%) | \$0.00 | (0.00%) |
| 36.                                                       | Samsung GT-P7510 Galaxy Tab 10.1      | 136               | (0.23%)          | 55.88%        | 76               | (0.18%)         | 54.41%           | 8.61             | 00:06:15        | 0.00%           | 0 | (0.00%) | \$0.00 | (0.00%) |
| 37.                                                       | Amazon KFTT Kindle Fire HD 7          | 135               | (0.22%)          | 74.81%        | 101              | (0.24%)         | 65.19%           | 3.14             | 00:01:35        | 0.00%           | 0 | (0.00%) | \$0.00 | (0.00%) |
| 38.                                                       | Samsung GT-S5360L Galaxy Y            | 132               | (0.22%)          | 67.42%        | 89               | (0.21%)         | 51.52%           | 3.77             | 00:03:32        | 0.00%           | 0 | (0.00%) | \$0.00 | (0.00%) |
| 39.                                                       | SonyEricsson LT26i Xperia Arc HD      | 131               | (0.22%)          | 46.56%        | 61               | (0.15%)         | 48.85%           | 4.76             | 00:06:29        | 0.00%           | 0 | (0.00%) | \$0.00 | (0.00%) |
| 40.                                                       | Nokia 311 Asha 311                    | 129               | (0.21%)          | 83.72%        | 108              | (0.26%)         | 57.36%           | 3.74             | 00:03:26        | 0.00%           | 0 | (0.00%) | \$0.00 | (0.00%) |

| Global Mobile Device Performance Report - Q3 2012 |                                       |                |                  |                 |                |                  |                 |                |                  |                 |
|---------------------------------------------------|---------------------------------------|----------------|------------------|-----------------|----------------|------------------|-----------------|----------------|------------------|-----------------|
| Rank                                              | Device Model                          | Q3 Performance |                  |                 | Q2 Performance |                  |                 | Q1 Performance |                  |                 |
|                                                   |                                       | Sales (Units)  | Market Share (%) | Avg. Price (\$) | Sales (Units)  | Market Share (%) | Avg. Price (\$) | Sales (Units)  | Market Share (%) | Avg. Price (\$) |
| 41.                                               | Samsung GT-I9082 Galaxy Grand Duos    | 128 (0.21%)    | 67.97%           | 87 (0.21%)      | 59.38%         | 2.55             | 00:03:30        | 0.00%          | 0 (0.00%)        | \$0.00 (0.00%)  |
| 42.                                               | Nokia Lumia 710                       | 124 (0.21%)    | 69.35%           | 86 (0.21%)      | 55.65%         | 4.45             | 00:05:53        | 0.00%          | 0 (0.00%)        | \$0.00 (0.00%)  |
| 43.                                               | Nokia 5233                            | 123 (0.20%)    | 95.12%           | 117 (0.28%)     | 78.05%         | 1.42             | 00:00:35        | 0.00%          | 0 (0.00%)        | \$0.00 (0.00%)  |
| 44.                                               | Motorola XT914 Razr D1                | 119 (0.20%)    | 36.13%           | 43 (0.10%)      | 49.58%         | 3.55             | 00:04:01        | 0.00%          | 0 (0.00%)        | \$0.00 (0.00%)  |
| 45.                                               | Lenovo 1838 ThinkPad Tablet           | 117 (0.19%)    | 2.56%            | 3 (0.01%)       | 18.80%         | 11.84            | 00:21:28        | 0.00%          | 0 (0.00%)        | \$0.00 (0.00%)  |
| 46.                                               | Samsung GT-S5360 Galaxy Y             | 109 (0.18%)    | 89.91%           | 98 (0.24%)      | 75.23%         | 2.06             | 00:01:23        | 0.00%          | 0 (0.00%)        | \$0.00 (0.00%)  |
| 47.                                               | Nokia Lumia 610                       | 108 (0.18%)    | 45.37%           | 49 (0.12%)      | 53.70%         | 3.17             | 00:03:25        | 0.00%          | 0 (0.00%)        | \$0.00 (0.00%)  |
| 48.                                               | Samsung GT-S5830i Galaxy Ace          | 108 (0.18%)    | 78.70%           | 85 (0.20%)      | 66.67%         | 2.62             | 00:02:10        | 0.00%          | 0 (0.00%)        | \$0.00 (0.00%)  |
| 49.                                               | Samsung GT-I9070 Galaxy S Advance     | 106 (0.18%)    | 72.64%           | 77 (0.18%)      | 58.49%         | 3.42             | 00:02:49        | 0.00%          | 0 (0.00%)        | \$0.00 (0.00%)  |
| 50.                                               | Huawei U9200 Ascend P1                | 103 (0.17%)    | 12.62%           | 13 (0.03%)      | 24.27%         | 7.67             | 00:04:41        | 0.00%          | 0 (0.00%)        | \$0.00 (0.00%)  |
| 51.                                               | Motorola XT1033 Moto G                | 103 (0.17%)    | 39.81%           | 41 (0.10%)      | 52.43%         | 3.68             | 00:03:41        | 0.00%          | 0 (0.00%)        | \$0.00 (0.00%)  |
| 52.                                               | Samsung GT-N7000 Galaxy Note          | 101 (0.17%)    | 85.15%           | 86 (0.21%)      | 75.25%         | 2.19             | 00:01:11        | 0.00%          | 0 (0.00%)        | \$0.00 (0.00%)  |
| 53.                                               | BlackBerry 9900 Dakota                | 98 (0.16%)     | 72.45%           | 71 (0.17%)      | 60.20%         | 3.82             | 00:02:47        | 0.00%          | 0 (0.00%)        | \$0.00 (0.00%)  |
| 54.                                               | Samsung GT-S5830 Galaxy Ace           | 97 (0.16%)     | 73.20%           | 71 (0.17%)      | 51.55%         | 3.87             | 00:04:37        | 0.00%          | 0 (0.00%)        | \$0.00 (0.00%)  |
| 55.                                               | Samsung SGH-T999 Galaxy S III         | 97 (0.16%)     | 40.21%           | 39 (0.09%)      | 81.44%         | 2.18             | 00:01:02        | 0.00%          | 0 (0.00%)        | \$0.00 (0.00%)  |
| 56.                                               | Nokia 200 Asha 200                    | 96 (0.16%)     | 96.88%           | 93 (0.22%)      | 67.71%         | 1.76             | 00:01:12        | 0.00%          | 0 (0.00%)        | \$0.00 (0.00%)  |
| 57.                                               | Samsung GT-N5110 Galaxy Note 8.0 WiFi | 96 (0.16%)     | 32.29%           | 31 (0.07%)      | 32.29%         | 6.28             | 00:06:02        | 0.00%          | 0 (0.00%)        | \$0.00 (0.00%)  |
| 58.                                               | Nokia Asha 302 Asha 302               | 94 (0.16%)     | 91.49%           | 86 (0.21%)      | 73.40%         | 1.81             | 00:01:26        | 0.00%          | 0 (0.00%)        | \$0.00 (0.00%)  |
| 59.                                               | Nokia X2-02                           | 92 (0.15%)     | 83.70%           | 77 (0.18%)      | 60.87%         | 2.83             | 00:04:34        | 0.00%          | 0 (0.00%)        | \$0.00 (0.00%)  |
| 60.                                               | Samsung SM-T210 Galaxy Tab 3 7.0      | 91 (0.15%)     | 70.33%           | 64 (0.15%)      | 59.34%         | 3.33             | 00:03:50        | 0.00%          | 0 (0.00%)        | \$0.00 (0.00%)  |
| 61.                                               | Sony Tablet S                         | 91 (0.15%)     | 25.27%           | 23 (0.06%)      | 43.96%         | 7.79             | 00:08:17        | 0.00%          | 0 (0.00%)        | \$0.00 (0.00%)  |
| 62.                                               | BlackBerry 9300 Curve 3G              | 90 (0.15%)     | 81.11%           | 73 (0.18%)      | 63.33%         | 3.20             | 00:02:43        | 0.00%          | 0 (0.00%)        | \$0.00 (0.00%)  |
| 63.                                               | Samsung GT-N5110 Galaxy Note 8.0      | 90 (0.15%)     | 16.67%           | 15 (0.04%)      | 27.78%         | 7.48             | 00:05:29        | 0.00%          | 0 (0.00%)        | \$0.00 (0.00%)  |
| 64.                                               | Nokia Lumia 505                       | 88 (0.15%)     | 55.68%           | 49 (0.12%)      | 43.18%         | 3.55             | 00:04:58        | 0.00%          | 0 (0.00%)        | \$0.00 (0.00%)  |
| 65.                                               | Motorola XT1032 Moto G                | 87 (0.14%)     | 71.26%           | 62 (0.15%)      | 59.77%         | 3.18             | 00:01:56        | 0.00%          | 0 (0.00%)        | \$0.00 (0.00%)  |
| 66.                                               | Samsung GT-S7562 Galaxy S Duos        | 85 (0.14%)     | 89.41%           | 76 (0.18%)      | 71.76%         | 2.08             | 00:01:59        | 0.00%          | 0 (0.00%)        | \$0.00 (0.00%)  |
| 67.                                               | Opera Mini 1                          | 84 (0.14%)     | 82.14%           | 69 (0.17%)      | 65.48%         | 2.44             | 00:02:40        | 0.00%          | 0 (0.00%)        | \$0.00 (0.00%)  |
| 68.                                               | HTC M7 One                            | 83 (0.14%)     | 80.72%           | 67 (0.16%)      | 75.90%         | 1.60             | 00:00:22        | 0.00%          | 0 (0.00%)        | \$0.00 (0.00%)  |
| 69.                                               | Motorola MOTXT912B Droid Razr 4G      | 83 (0.14%)     | 66.27%           | 55 (0.13%)      | 67.47%         | 5.10             | 00:04:31        | 0.00%          | 0 (0.00%)        | \$0.00 (0.00%)  |

| Rank | Device                              | Score      | Percentage | Crashes    | Crash Rate | Crash Time | Crash Duration | Crash Type | Crash Count | Crash Cost     |
|------|-------------------------------------|------------|------------|------------|------------|------------|----------------|------------|-------------|----------------|
| 70.  | Nokia 308 Asha 308                  | 83 (0.14%) | 93.98%     | 78 (0.19%) | 62.65%     | 2.10       | 00:01:36       | 0.00%      | 0 (0.00%)   | \$0.00 (0.00%) |
| 71.  | BlackBerry 9800 Torch               | 80 (0.13%) | 82.50%     | 66 (0.16%) | 67.50%     | 1.79       | 00:01:40       | 0.00%      | 0 (0.00%)   | \$0.00 (0.00%) |
| 72.  | Samsung GT-I8190N Galaxy S III Mini | 80 (0.13%) | 73.75%     | 59 (0.14%) | 68.75%     | 2.18       | 00:01:08       | 0.00%      | 0 (0.00%)   | \$0.00 (0.00%) |
| 73.  | Samsung GT-P1000 Galaxy Tab         | 79 (0.13%) | 56.96%     | 45 (0.11%) | 48.10%     | 13.35      | 00:08:50       | 0.00%      | 0 (0.00%)   | \$0.00 (0.00%) |
| 74.  | Sony C1904 Xperia M                 | 78 (0.13%) | 28.21%     | 22 (0.05%) | 23.08%     | 6.42       | 00:07:23       | 0.00%      | 0 (0.00%)   | \$0.00 (0.00%) |
| 75.  | Samsung Galaxy Nexus                | 77 (0.13%) | 58.44%     | 45 (0.11%) | 74.03%     | 2.92       | 00:01:31       | 0.00%      | 0 (0.00%)   | \$0.00 (0.00%) |
| 76.  | Samsung SM-T311 Galaxy Tab 3 8.0    | 77 (0.13%) | 31.17%     | 24 (0.06%) | 61.04%     | 3.91       | 00:03:34       | 0.00%      | 0 (0.00%)   | \$0.00 (0.00%) |
| 77.  | Samsung GT-S5830L Galaxy Ace        | 76 (0.13%) | 71.05%     | 54 (0.13%) | 59.21%     | 3.54       | 00:03:18       | 0.00%      | 0 (0.00%)   | \$0.00 (0.00%) |
| 78.  | Samsung SM-C101 GALAXY S4 Zoom      | 76 (0.13%) | 10.53%     | 8 (0.02%)  | 28.95%     | 7.38       | 00:07:41       | 0.00%      | 0 (0.00%)   | \$0.00 (0.00%) |
| 79.  | Amazon Kindle Fire Kindle Fire      | 75 (0.12%) | 61.33%     | 46 (0.11%) | 70.67%     | 3.44       | 00:03:09       | 0.00%      | 0 (0.00%)   | \$0.00 (0.00%) |
| 80.  | Samsung SM-T310 Galaxy Tab 3 8.0    | 75 (0.12%) | 57.33%     | 43 (0.10%) | 58.67%     | 3.67       | 00:03:47       | 0.00%      | 0 (0.00%)   | \$0.00 (0.00%) |
| 81.  | Google Nexus 10                     | 74 (0.12%) | 68.92%     | 51 (0.12%) | 70.27%     | 4.08       | 00:02:11       | 0.00%      | 0 (0.00%)   | \$0.00 (0.00%) |
| 82.  | Samsung SM-N9005 Galaxy Note 3      | 74 (0.12%) | 89.19%     | 66 (0.16%) | 82.43%     | 1.80       | 00:00:31       | 0.00%      | 0 (0.00%)   | \$0.00 (0.00%) |
| 83.  | Nokia Lumia 620                     | 71 (0.12%) | 70.42%     | 50 (0.12%) | 56.34%     | 3.62       | 00:02:59       | 0.00%      | 0 (0.00%)   | \$0.00 (0.00%) |
| 84.  | Samsung GT-I9195 Galaxy S4 Mini     | 71 (0.12%) | 81.69%     | 58 (0.14%) | 77.46%     | 2.32       | 00:01:49       | 0.00%      | 0 (0.00%)   | \$0.00 (0.00%) |
| 85.  | Lenovo A2107A-H IdeaTab A2107A-H    | 70 (0.12%) | 27.14%     | 19 (0.05%) | 54.29%     | 4.13       | 00:07:55       | 0.00%      | 0 (0.00%)   | \$0.00 (0.00%) |
| 86.  | Nokia Nokia Asha 201 Asha 201       | 69 (0.11%) | 91.30%     | 63 (0.15%) | 73.91%     | 2.07       | 00:02:24       | 0.00%      | 0 (0.00%)   | \$0.00 (0.00%) |
| 87.  | SonyEricsson C6603 Xperia Z         | 69 (0.11%) | 84.06%     | 58 (0.14%) | 73.91%     | 2.43       | 00:01:06       | 0.00%      | 0 (0.00%)   | \$0.00 (0.00%) |
| 88.  | Nokia C3-00                         | 68 (0.11%) | 94.12%     | 64 (0.15%) | 60.29%     | 2.31       | 00:03:55       | 0.00%      | 0 (0.00%)   | \$0.00 (0.00%) |
| 89.  | Nokia Lumia 920                     | 66 (0.11%) | 72.73%     | 48 (0.12%) | 56.06%     | 3.53       | 00:02:32       | 0.00%      | 0 (0.00%)   | \$0.00 (0.00%) |
| 90.  | Toshiba AT200 Excite AT200          | 66 (0.11%) | 4.55%      | 3 (0.01%)  | 69.70%     | 2.32       | 00:03:28       | 0.00%      | 0 (0.00%)   | \$0.00 (0.00%) |
| 91.  | Samsung SPH-L710 Galaxy S III       | 65 (0.11%) | 80.00%     | 52 (0.12%) | 75.38%     | 2.89       | 00:01:33       | 0.00%      | 0 (0.00%)   | \$0.00 (0.00%) |
| 92.  | BlackBerry 8520 Curve               | 64 (0.11%) | 85.94%     | 55 (0.13%) | 64.06%     | 1.91       | 00:02:20       | 0.00%      | 0 (0.00%)   | \$0.00 (0.00%) |
| 93.  | BlackBerry 9360 Curve               | 64 (0.11%) | 78.12%     | 50 (0.12%) | 65.62%     | 2.14       | 00:02:04       | 0.00%      | 0 (0.00%)   | \$0.00 (0.00%) |
| 94.  | Motorola XT1058 Moto X              | 64 (0.11%) | 35.94%     | 23 (0.06%) | 57.81%     | 3.02       | 00:02:04       | 0.00%      | 0 (0.00%)   | \$0.00 (0.00%) |
| 95.  | Nokia Lumia 800                     | 64 (0.11%) | 82.81%     | 53 (0.13%) | 76.56%     | 3.72       | 00:02:20       | 0.00%      | 0 (0.00%)   | \$0.00 (0.00%) |
| 96.  | Nokia 305 Asha 305                  | 63 (0.10%) | 93.65%     | 59 (0.14%) | 69.84%     | 1.59       | 00:00:56       | 0.00%      | 0 (0.00%)   | \$0.00 (0.00%) |
| 97.  | Samsung SM-T211 Galaxy Tab 3 7.0 3G | 63 (0.10%) | 53.97%     | 34 (0.08%) | 41.27%     | 4.60       | 00:04:11       | 0.00%      | 0 (0.00%)   | \$0.00 (0.00%) |

| Comprehensive Mobile Device Performance Analysis - Q3 2023 |                                                 |                     |                |               |                  |       |           |                         |             |                  |  |
|------------------------------------------------------------|-------------------------------------------------|---------------------|----------------|---------------|------------------|-------|-----------|-------------------------|-------------|------------------|--|
| Rank                                                       | Device Model                                    | Performance Metrics |                |               | Usage Statistics |       |           | Market & Financial Data |             |                  |  |
|                                                            |                                                 | Score               | Efficiency (%) | Stability (%) | Hours            | Days  | Cost (\$) | Revenue (\$)            | Profit (\$) | Market Share (%) |  |
| 98.                                                        | HTC PJ83100 One X                               | 61 (0.10%)          | 78.69%         | 48 (0.12%)    | 77.05%           | 1.61  | 00:00:59  | 0.00%                   | 0 (0.00%)   | \$0.00 (0.00%)   |  |
| 99.                                                        | LG E400f Optimus L3                             | 61 (0.10%)          | 45.90%         | 28 (0.07%)    | 39.34%           | 11.41 | 00:17:41  | 0.00%                   | 0 (0.00%)   | \$0.00 (0.00%)   |  |
| 100.                                                       | Motorola XT923 Droid Razr HD                    | 61 (0.10%)          | 52.46%         | 32 (0.08%)    | 63.93%           | 4.13  | 00:02:14  | 0.00%                   | 0 (0.00%)   | \$0.00 (0.00%)   |  |
| 101.                                                       | Nokia 206 Asha 206                              | 58 (0.10%)          | 82.76%         | 48 (0.12%)    | 60.34%           | 2.14  | 00:01:29  | 0.00%                   | 0 (0.00%)   | \$0.00 (0.00%)   |  |
| 102.                                                       | LG Nexus 5                                      | 57 (0.09%)          | 85.96%         | 49 (0.12%)    | 85.96%           | 1.51  | 00:00:34  | 0.00%                   | 0 (0.00%)   | \$0.00 (0.00%)   |  |
| 103.                                                       | Samsung GT-I8262 Galaxy Duos                    | 57 (0.09%)          | 82.46%         | 47 (0.11%)    | 50.88%           | 3.75  | 00:04:01  | 0.00%                   | 0 (0.00%)   | \$0.00 (0.00%)   |  |
| 104.                                                       | Samsung GT-N7105 Galaxy Note II                 | 57 (0.09%)          | 91.23%         | 52 (0.12%)    | 78.95%           | 2.86  | 00:01:33  | 0.00%                   | 0 (0.00%)   | \$0.00 (0.00%)   |  |
| 105.                                                       | Nokia Lumia 900                                 | 56 (0.09%)          | 57.14%         | 32 (0.08%)    | 58.93%           | 2.77  | 00:02:59  | 0.00%                   | 0 (0.00%)   | \$0.00 (0.00%)   |  |
| 106.                                                       | Samsung GT-P7500 Galaxy Tab 10.1                | 56 (0.09%)          | 78.57%         | 44 (0.11%)    | 75.00%           | 1.86  | 00:00:57  | 0.00%                   | 0 (0.00%)   | \$0.00 (0.00%)   |  |
| 107.                                                       | Samsung SGH-T989 Galaxy SII                     | 56 (0.09%)          | 69.64%         | 39 (0.09%)    | 69.64%           | 2.95  | 00:01:28  | 0.00%                   | 0 (0.00%)   | \$0.00 (0.00%)   |  |
| 108.                                                       | Samsung GT-I8160 Galaxy Ace 2                   | 55 (0.09%)          | 78.18%         | 43 (0.10%)    | 58.18%           | 3.49  | 00:03:21  | 0.00%                   | 0 (0.00%)   | \$0.00 (0.00%)   |  |
| 109.                                                       | Samsung GT-I9000 Galaxy S                       | 55 (0.09%)          | 81.82%         | 45 (0.11%)    | 74.55%           | 1.53  | 00:01:10  | 0.00%                   | 0 (0.00%)   | \$0.00 (0.00%)   |  |
| 110.                                                       | Samsung GT-S6802B Galaxy Ace Duos               | 55 (0.09%)          | 14.55%         | 8 (0.02%)     | 23.64%           | 6.73  | 00:08:49  | 0.00%                   | 0 (0.00%)   | \$0.00 (0.00%)   |  |
| 111.                                                       | Asus ME173X Memo Pad HD7                        | 54 (0.09%)          | 51.85%         | 28 (0.07%)    | 75.93%           | 2.09  | 00:01:03  | 0.00%                   | 0 (0.00%)   | \$0.00 (0.00%)   |  |
| 112.                                                       | Motorola XT890 RAZR i                           | 53 (0.09%)          | 73.58%         | 39 (0.09%)    | 50.94%           | 2.68  | 00:02:41  | 0.00%                   | 0 (0.00%)   | \$0.00 (0.00%)   |  |
| 113.                                                       | Samsung SGH-I337 Galaxy S IV                    | 53 (0.09%)          | 88.68%         | 47 (0.11%)    | 79.25%           | 2.92  | 00:01:23  | 0.00%                   | 0 (0.00%)   | \$0.00 (0.00%)   |  |
| 114.                                                       | SonyEricsson LT22i Xperia P LT22i               | 53 (0.09%)          | 86.79%         | 46 (0.11%)    | 67.92%           | 2.55  | 00:01:31  | 0.00%                   | 0 (0.00%)   | \$0.00 (0.00%)   |  |
| 115.                                                       | Asus TF300T Transformer Pad TF300T              | 52 (0.09%)          | 76.92%         | 40 (0.10%)    | 61.54%           | 3.92  | 00:03:23  | 0.00%                   | 0 (0.00%)   | \$0.00 (0.00%)   |  |
| 116.                                                       | LG MS770 Motion 4G                              | 52 (0.09%)          | 67.31%         | 35 (0.08%)    | 82.69%           | 1.56  | 00:01:21  | 0.00%                   | 0 (0.00%)   | \$0.00 (0.00%)   |  |
| 117.                                                       | Samsung GT-I9192 Galaxy S4 Mini                 | 52 (0.09%)          | 73.08%         | 38 (0.09%)    | 59.62%           | 3.35  | 00:02:32  | 0.00%                   | 0 (0.00%)   | \$0.00 (0.00%)   |  |
| 118.                                                       | BlackBerry 9700 Bold                            | 51 (0.08%)          | 78.43%         | 40 (0.10%)    | 70.59%           | 1.80  | 00:01:25  | 0.00%                   | 0 (0.00%)   | \$0.00 (0.00%)   |  |
| 119.                                                       | Samsung GT-S6102B Galaxy Y Duos                 | 51 (0.08%)          | 68.63%         | 35 (0.08%)    | 45.10%           | 7.47  | 00:08:22  | 0.00%                   | 0 (0.00%)   | \$0.00 (0.00%)   |  |
| 120.                                                       | Nokia Lumia 820                                 | 50 (0.08%)          | 62.00%         | 31 (0.07%)    | 42.00%           | 10.54 | 00:12:50  | 0.00%                   | 0 (0.00%)   | \$0.00 (0.00%)   |  |
| 121.                                                       | Samsung GT-I9305 Galaxy S III LTE International | 50 (0.08%)          | 86.00%         | 43 (0.10%)    | 72.00%           | 2.46  | 00:00:57  | 0.00%                   | 0 (0.00%)   | \$0.00 (0.00%)   |  |
| 122.                                                       | Samsung GT-S6810P Galaxy Fame                   | 50 (0.08%)          | 42.00%         | 21 (0.05%)    | 42.00%           | 9.28  | 00:09:03  | 0.00%                   | 0 (0.00%)   | \$0.00 (0.00%)   |  |
| 123.                                                       | Samsung SCH-I545 Galaxy S IV                    | 50 (0.08%)          | 84.00%         | 42 (0.10%)    | 78.00%           | 2.10  | 00:01:00  | 0.00%                   | 0 (0.00%)   | \$0.00 (0.00%)   |  |
| 124.                                                       | Samsung GT-I9190 Galaxy S4 Mini                 | 49 (0.08%)          | 59.18%         | 29 (0.07%)    | 61.22%           | 2.84  | 00:04:19  | 0.00%                   | 0 (0.00%)   | \$0.00 (0.00%)   |  |

| Mini |                                        | Rank       | Market Share | Units Sold | Revenue | Price | Time     | Profit | Loss      | Net            |
|------|----------------------------------------|------------|--------------|------------|---------|-------|----------|--------|-----------|----------------|
| 125. | Samsung GT-S5360B Galaxy Y             | 49 (0.08%) | 67.35%       | 33 (0.08%) | 48.98%  | 4.29  | 00:06:15 | 0.00%  | 0 (0.00%) | \$0.00 (0.00%) |
| 126. | Samsung GT-S5570 Galaxy Mini           | 49 (0.08%) | 89.80%       | 44 (0.11%) | 71.43%  | 1.67  | 00:01:10 | 0.00%  | 0 (0.00%) | \$0.00 (0.00%) |
| 127. | BlackBerry 9780                        | 48 (0.08%) | 75.00%       | 36 (0.09%) | 66.67%  | 2.65  | 00:01:37 | 0.00%  | 0 (0.00%) | \$0.00 (0.00%) |
| 128. | BlackBerry PlayBook                    | 48 (0.08%) | 79.17%       | 38 (0.09%) | 54.17%  | 2.35  | 00:01:15 | 0.00%  | 0 (0.00%) | \$0.00 (0.00%) |
| 129. | LG E425f Optimus L3 II                 | 48 (0.08%) | 16.67%       | 8 (0.02%)  | 35.42%  | 10.42 | 00:18:24 | 0.00%  | 0 (0.00%) | \$0.00 (0.00%) |
| 130. | Samsung GT-S6102 Galaxy Y Duos         | 48 (0.08%) | 79.17%       | 38 (0.09%) | 70.83%  | 2.12  | 00:01:58 | 0.00%  | 0 (0.00%) | \$0.00 (0.00%) |
| 131. | LG E400g Optimus L3                    | 47 (0.08%) | 53.19%       | 25 (0.06%) | 48.94%  | 4.43  | 00:06:08 | 0.00%  | 0 (0.00%) | \$0.00 (0.00%) |
| 132. | Nokia 205 Asha 205                     | 47 (0.08%) | 93.62%       | 44 (0.11%) | 87.23%  | 1.23  | 00:00:33 | 0.00%  | 0 (0.00%) | \$0.00 (0.00%) |
| 133. | BlackBerry 9810 Torch 4G               | 46 (0.08%) | 86.96%       | 40 (0.10%) | 58.70%  | 3.41  | 00:02:36 | 0.00%  | 0 (0.00%) | \$0.00 (0.00%) |
| 134. | Samsung SM-N900T Galaxy Note 3         | 46 (0.08%) | 82.61%       | 38 (0.09%) | 67.39%  | 3.33  | 00:02:10 | 0.00%  | 0 (0.00%) | \$0.00 (0.00%) |
| 135. | Motorola XT919 RAZR D3                 | 45 (0.07%) | 73.33%       | 33 (0.08%) | 55.56%  | 3.07  | 00:02:48 | 0.00%  | 0 (0.00%) | \$0.00 (0.00%) |
| 136. | Samsung SGH-i520V                      | 44 (0.07%) | 100.00%      | 44 (0.11%) | 70.45%  | 1.43  | 00:00:49 | 0.00%  | 0 (0.00%) | \$0.00 (0.00%) |
| 137. | Sony ST21a Xperia Tipo                 | 44 (0.07%) | 45.45%       | 20 (0.05%) | 63.64%  | 3.07  | 00:03:36 | 0.00%  | 0 (0.00%) | \$0.00 (0.00%) |
| 138. | BlackBerry 9790 BlackBerry Bold 9790   | 43 (0.07%) | 93.02%       | 40 (0.10%) | 72.09%  | 2.07  | 00:00:52 | 0.00%  | 0 (0.00%) | \$0.00 (0.00%) |
| 139. | Sony LT30p Xperia T                    | 43 (0.07%) | 60.47%       | 26 (0.06%) | 74.42%  | 4.07  | 00:01:42 | 0.00%  | 0 (0.00%) | \$0.00 (0.00%) |
| 140. | Motorola XT295 Droid Razr HD           | 42 (0.07%) | 57.14%       | 24 (0.06%) | 52.38%  | 5.71  | 00:05:54 | 0.00%  | 0 (0.00%) | \$0.00 (0.00%) |
| 141. | Nokia Lumia 925                        | 42 (0.07%) | 35.71%       | 15 (0.04%) | 26.19%  | 10.12 | 00:11:41 | 0.00%  | 0 (0.00%) | \$0.00 (0.00%) |
| 142. | Samsung GT-E1282T                      | 42 (0.07%) | 54.76%       | 23 (0.06%) | 61.90%  | 2.29  | 00:01:52 | 0.00%  | 0 (0.00%) | \$0.00 (0.00%) |
| 143. | Samsung GT-S7500L Galaxy Ace Plus      | 42 (0.07%) | 61.90%       | 26 (0.06%) | 42.86%  | 6.79  | 00:09:49 | 0.00%  | 0 (0.00%) | \$0.00 (0.00%) |
| 144. | Samsung SGH-I727 Galaxy S II Skyrocket | 42 (0.07%) | 33.33%       | 14 (0.03%) | 83.33%  | 1.83  | 00:02:30 | 0.00%  | 0 (0.00%) | \$0.00 (0.00%) |
| 145. | Huawei Y300 Ascend Y 300               | 41 (0.07%) | 68.29%       | 28 (0.07%) | 56.10%  | 2.73  | 00:01:26 | 0.00%  | 0 (0.00%) | \$0.00 (0.00%) |
| 146. | Samsung SM-T210R Galaxy Tab 3 7.0      | 41 (0.07%) | 80.49%       | 33 (0.08%) | 65.85%  | 2.63  | 00:04:38 | 0.00%  | 0 (0.00%) | \$0.00 (0.00%) |
| 147. | Sony C2104 Xperia L                    | 41 (0.07%) | 73.17%       | 30 (0.07%) | 39.02%  | 5.22  | 00:04:52 | 0.00%  | 0 (0.00%) | \$0.00 (0.00%) |
| 148. | SonyEricsson ST25a Xperia U            | 41 (0.07%) | 53.66%       | 22 (0.05%) | 60.98%  | 3.15  | 00:03:14 | 0.00%  | 0 (0.00%) | \$0.00 (0.00%) |
| 149. | Alcatel OT-4030/ S-POP                 | 40 (0.07%) | 30.00%       | 12 (0.03%) | 40.00%  | 14.70 | 00:13:05 | 0.00%  | 0 (0.00%) | \$0.00 (0.00%) |
| 150. | Asus TF101 Eee Pad Transformer TF101   | 40 (0.07%) | 77.50%       | 31 (0.07%) | 70.00%  | 3.08  | 00:01:16 | 0.00%  | 0 (0.00%) | \$0.00 (0.00%) |
| 151. | Nokia 200 Nokia Asha 200               | 40 (0.07%) | 92.50%       | 37 (0.09%) | 60.00%  | 1.98  | 00:01:34 | 0.00%  | 0 (0.00%) | \$0.00 (0.00%) |
| 152. | Nokia 303 Asha                         | 40 (0.07%) | 95.00%       | 38 (0.09%) | 77.50%  | 1.30  | 00:00:12 | 0.00%  | 0 (0.00%) | \$0.00 (0.00%) |

| Rank | Model                                   | Score      | Percentage | Count      | Percentage | Score | Time     | Percentage | Count     | Percentage     |
|------|-----------------------------------------|------------|------------|------------|------------|-------|----------|------------|-----------|----------------|
| 152. | 303                                     | 40 (0.07%) | 55.00%     | 30 (0.09%) | 77.50%     | 1.30  | 00:00:12 | 0.00%      | 0 (0.00%) | \$0.00 (0.00%) |
| 153. | Samsung GT-S5570L                       | 40 (0.07%) | 67.50%     | 27 (0.06%) | 57.50%     | 4.90  | 00:03:43 | 0.00%      | 0 (0.00%) | \$0.00 (0.00%) |
| 154. | Sony SGPT12 Xperia Tablet S             | 40 (0.07%) | 40.00%     | 16 (0.04%) | 40.00%     | 8.15  | 00:06:54 | 0.00%      | 0 (0.00%) | \$0.00 (0.00%) |
| 155. | Huawei MediaPad 7 Lite                  | 39 (0.06%) | 46.15%     | 18 (0.04%) | 51.28%     | 6.00  | 00:06:02 | 0.00%      | 0 (0.00%) | \$0.00 (0.00%) |
| 156. | Nokia Asha 202 Asha 202                 | 39 (0.06%) | 94.87%     | 37 (0.09%) | 61.54%     | 1.82  | 00:01:12 | 0.00%      | 0 (0.00%) | \$0.00 (0.00%) |
| 157. | Samsung GT-S6810 Galaxy Fame            | 39 (0.06%) | 48.72%     | 19 (0.05%) | 53.85%     | 3.59  | 00:06:11 | 0.00%      | 0 (0.00%) | \$0.00 (0.00%) |
| 158. | Samsung GT-S7710 Galaxy Xcover 2        | 39 (0.06%) | 56.41%     | 22 (0.05%) | 46.15%     | 3.87  | 00:02:37 | 0.00%      | 0 (0.00%) | \$0.00 (0.00%) |
| 159. | Acer A1-810                             | 38 (0.06%) | 57.89%     | 22 (0.05%) | 52.63%     | 5.39  | 00:02:21 | 0.00%      | 0 (0.00%) | \$0.00 (0.00%) |
| 160. | Samsung SCH-I605 Galaxy Note II         | 38 (0.06%) | 57.89%     | 22 (0.05%) | 73.68%     | 2.32  | 00:01:38 | 0.00%      | 0 (0.00%) | \$0.00 (0.00%) |
| 161. | Google Nexus One HTC Nexus One          | 37 (0.06%) | 78.38%     | 29 (0.07%) | 54.05%     | 10.59 | 00:02:53 | 0.00%      | 0 (0.00%) | \$0.00 (0.00%) |
| 162. | HTC A510 Wildfire S                     | 37 (0.06%) | 54.05%     | 20 (0.05%) | 48.65%     | 2.54  | 00:02:41 | 0.00%      | 0 (0.00%) | \$0.00 (0.00%) |
| 163. | LG E610 Optimus L5                      | 37 (0.06%) | 59.46%     | 22 (0.05%) | 78.38%     | 1.38  | 00:01:33 | 0.00%      | 0 (0.00%) | \$0.00 (0.00%) |
| 164. | Samsung GT-I8552B Galaxy Grand Quattro  | 37 (0.06%) | 45.95%     | 17 (0.04%) | 54.05%     | 3.49  | 00:03:36 | 0.00%      | 0 (0.00%) | \$0.00 (0.00%) |
| 165. | Motorola XT907 DROID RAZR M 4G LTE      | 36 (0.06%) | 69.44%     | 25 (0.06%) | 77.78%     | 4.53  | 00:02:06 | 0.00%      | 0 (0.00%) | \$0.00 (0.00%) |
| 166. | RIM Z10                                 | 36 (0.06%) | 88.89%     | 32 (0.08%) | 61.11%     | 3.36  | 00:02:08 | 0.00%      | 0 (0.00%) | \$0.00 (0.00%) |
| 167. | Samsung GT-S5222R Star III Duos         | 36 (0.06%) | 69.44%     | 25 (0.06%) | 50.00%     | 4.53  | 00:03:05 | 0.00%      | 0 (0.00%) | \$0.00 (0.00%) |
| 168. | Samsung GT-S5310L Galaxy Pocket Neo     | 36 (0.06%) | 52.78%     | 19 (0.05%) | 41.67%     | 3.56  | 00:02:20 | 0.00%      | 0 (0.00%) | \$0.00 (0.00%) |
| 169. | Sony C6903 Xperia Z1                    | 36 (0.06%) | 97.22%     | 35 (0.08%) | 86.11%     | 2.94  | 00:02:16 | 0.00%      | 0 (0.00%) | \$0.00 (0.00%) |
| 170. | Amazon KFOT Kindle Fire 7               | 35 (0.06%) | 91.43%     | 32 (0.08%) | 68.57%     | 2.63  | 00:01:54 | 0.00%      | 0 (0.00%) | \$0.00 (0.00%) |
| 171. | Samsung GT-S6810L Galaxy Fame           | 35 (0.06%) | 57.14%     | 20 (0.05%) | 42.86%     | 8.49  | 00:08:53 | 0.00%      | 0 (0.00%) | \$0.00 (0.00%) |
| 172. | SonyEricsson ST25i Xperia U             | 35 (0.06%) | 94.29%     | 33 (0.08%) | 85.71%     | 1.77  | 00:00:37 | 0.00%      | 0 (0.00%) | \$0.00 (0.00%) |
| 173. | Alcatel OT-4010/ One Touch T'Pop 4010A  | 34 (0.06%) | 82.35%     | 28 (0.07%) | 70.59%     | 2.79  | 00:01:14 | 0.00%      | 0 (0.00%) | \$0.00 (0.00%) |
| 174. | Alcatel OT-5020/ One Touch M'Pop        | 34 (0.06%) | 73.53%     | 25 (0.06%) | 70.59%     | 3.94  | 00:02:43 | 0.00%      | 0 (0.00%) | \$0.00 (0.00%) |
| 175. | Amazon KFTHW/ Kindle Fire HDX 7 3rd Gen | 34 (0.06%) | 85.29%     | 29 (0.07%) | 70.59%     | 1.38  | 00:00:14 | 0.00%      | 0 (0.00%) | \$0.00 (0.00%) |
| 176. | BlackBerry 9220                         | 34 (0.06%) | 88.24%     | 30 (0.07%) | 64.71%     | 2.79  | 00:04:57 | 0.00%      | 0 (0.00%) | \$0.00 (0.00%) |
| 177. | LG P880 Optimus 4X HD                   | 34 (0.06%) | 52.94%     | 18 (0.04%) | 55.88%     | 3.76  | 00:03:46 | 0.00%      | 0 (0.00%) | \$0.00 (0.00%) |
| 178. | Nokia Lumia 720                         | 34 (0.06%) | 82.35%     | 28 (0.07%) | 50.00%     | 3.38  | 00:01:58 | 0.00%      | 0 (0.00%) | \$0.00 (0.00%) |
| 179. | Samsung SGH-I317 Galaxy Note            | 34 (0.06%) | 67.65%     | 23 (0.06%) | 88.24%     | 1.21  | 00:00:18 | 0.00%      | 0 (0.00%) | \$0.00 (0.00%) |

| Rank | Device                                   | Score      | Percentage | Count      | Percentage | Time | Score    | Percentage | Count     | Percentage     |
|------|------------------------------------------|------------|------------|------------|------------|------|----------|------------|-----------|----------------|
| 179. | Samsung Galaxy Note II                   | 34 (0.05%) | 97.93%     | 29 (0.05%) | 88.24%     | 1.21 | 00:00:15 | 0.00%      | 0 (0.00%) | \$0.00 (0.00%) |
| 180. | Acer A500 Picasso                        | 33 (0.05%) | 90.91%     | 30 (0.07%) | 51.52%     | 3.06 | 00:01:31 | 0.00%      | 0 (0.00%) | \$0.00 (0.00%) |
| 181. | Nokia 110                                | 33 (0.05%) | 100.00%    | 33 (0.08%) | 45.45%     | 2.52 | 00:02:52 | 0.00%      | 0 (0.00%) | \$0.00 (0.00%) |
| 182. | Samsung GT-P5200 Galaxy Tab 3 10.1 3G    | 33 (0.05%) | 75.76%     | 25 (0.06%) | 66.67%     | 3.79 | 00:04:50 | 0.00%      | 0 (0.00%) | \$0.00 (0.00%) |
| 183. | Sony ST26i Xperia J                      | 33 (0.05%) | 60.61%     | 20 (0.05%) | 63.64%     | 1.97 | 00:02:16 | 0.00%      | 0 (0.00%) | \$0.00 (0.00%) |
| 184. | HTC PJ401 One S                          | 32 (0.05%) | 78.12%     | 25 (0.06%) | 65.62%     | 3.41 | 00:01:53 | 0.00%      | 0 (0.00%) | \$0.00 (0.00%) |
| 185. | HTC T328E Desire X                       | 32 (0.05%) | 46.88%     | 15 (0.04%) | 75.00%     | 1.41 | 00:01:18 | 0.00%      | 0 (0.00%) | \$0.00 (0.00%) |
| 186. | LG P769 Optimus L9                       | 32 (0.05%) | 78.12%     | 25 (0.06%) | 71.88%     | 2.50 | 00:01:17 | 0.00%      | 0 (0.00%) | \$0.00 (0.00%) |
| 187. | Nokia Lumia 510                          | 32 (0.05%) | 71.88%     | 23 (0.06%) | 56.25%     | 2.12 | 00:03:45 | 0.00%      | 0 (0.00%) | \$0.00 (0.00%) |
| 188. | Samsung GT-I9082L Galaxy Grand Duos      | 32 (0.05%) | 65.62%     | 21 (0.05%) | 53.12%     | 2.50 | 00:01:57 | 0.00%      | 0 (0.00%) | \$0.00 (0.00%) |
| 189. | Samsung GT-N8013 Galaxy Note 10.1        | 32 (0.05%) | 78.12%     | 25 (0.06%) | 46.88%     | 3.72 | 00:02:38 | 0.00%      | 0 (0.00%) | \$0.00 (0.00%) |
| 190. | Samsung SGH-M919 Galaxy S IV             | 32 (0.05%) | 87.50%     | 28 (0.07%) | 78.12%     | 1.75 | 00:00:33 | 0.00%      | 0 (0.00%) | \$0.00 (0.00%) |
| 191. | LG E450g Optimus L5 II                   | 31 (0.05%) | 35.48%     | 11 (0.03%) | 32.26%     | 5.52 | 00:04:22 | 0.00%      | 0 (0.00%) | \$0.00 (0.00%) |
| 192. | Nokia C2-02                              | 31 (0.05%) | 77.42%     | 24 (0.06%) | 51.61%     | 3.74 | 00:08:05 | 0.00%      | 0 (0.00%) | \$0.00 (0.00%) |
| 193. | Sony C5303 Xperia SP                     | 31 (0.05%) | 70.97%     | 22 (0.05%) | 64.52%     | 1.90 | 00:01:54 | 0.00%      | 0 (0.00%) | \$0.00 (0.00%) |
| 194. | SonyEricsson ST27i                       | 31 (0.05%) | 87.10%     | 27 (0.06%) | 64.52%     | 2.90 | 00:03:19 | 0.00%      | 0 (0.00%) | \$0.00 (0.00%) |
| 195. | Barnes and Noble BNTV600 Nook HD+ Tablet | 30 (0.05%) | 73.33%     | 22 (0.05%) | 50.00%     | 4.83 | 00:03:48 | 0.00%      | 0 (0.00%) | \$0.00 (0.00%) |
| 196. | HP Slate 7                               | 30 (0.05%) | 60.00%     | 18 (0.04%) | 66.67%     | 2.30 | 00:02:03 | 0.00%      | 0 (0.00%) | \$0.00 (0.00%) |
| 197. | HTC ADR6300 Incredible                   | 30 (0.05%) | 20.00%     | 6 (0.01%)  | 43.33%     | 3.47 | 00:01:43 | 0.00%      | 0 (0.00%) | \$0.00 (0.00%) |
| 198. | LG E615f Optimus L5 Dual                 | 30 (0.05%) | 40.00%     | 12 (0.03%) | 40.00%     | 5.37 | 00:10:59 | 0.00%      | 0 (0.00%) | \$0.00 (0.00%) |
| 199. | Nokia C2-01                              | 30 (0.05%) | 93.33%     | 28 (0.07%) | 70.00%     | 1.60 | 00:01:37 | 0.00%      | 0 (0.00%) | \$0.00 (0.00%) |
| 200. | Samsung GT-I9080L Galaxy Grand           | 30 (0.05%) | 43.33%     | 13 (0.03%) | 70.00%     | 2.57 | 00:02:59 | 0.00%      | 0 (0.00%) | \$0.00 (0.00%) |
| 201. | HTC Desire HD                            | 29 (0.05%) | 51.72%     | 15 (0.04%) | 58.62%     | 2.41 | 00:01:02 | 0.00%      | 0 (0.00%) | \$0.00 (0.00%) |
| 202. | Nokia 112                                | 29 (0.05%) | 86.21%     | 25 (0.06%) | 79.31%     | 1.66 | 00:00:51 | 0.00%      | 0 (0.00%) | \$0.00 (0.00%) |
| 203. | Opera Mini 3                             | 29 (0.05%) | 96.55%     | 28 (0.07%) | 75.86%     | 1.62 | 00:00:24 | 0.00%      | 0 (0.00%) | \$0.00 (0.00%) |
| 204. | PiPO M1                                  | 29 (0.05%) | 96.55%     | 28 (0.07%) | 93.10%     | 1.10 | 00:00:08 | 0.00%      | 0 (0.00%) | \$0.00 (0.00%) |
| 205. | Samsung GT-S6310N Galaxy Young           | 29 (0.05%) | 51.72%     | 15 (0.04%) | 82.76%     | 2.24 | 00:03:46 | 0.00%      | 0 (0.00%) | \$0.00 (0.00%) |
| 206. | Samsung GT-S7560M Galaxy Ace II x        | 29 (0.05%) | 72.41%     | 21 (0.05%) | 79.31%     | 1.52 | 00:01:05 | 0.00%      | 0 (0.00%) | \$0.00 (0.00%) |
| 207. | Sony C2105 Xperia L                      | 29 (0.05%) | 79.31%     | 23 (0.06%) | 75.86%     | 1.90 | 00:00:22 | 0.00%      | 0 (0.00%) | \$0.00 (0.00%) |
| 208. | SonyEricsson R800i Xperia PLAY           | 29 (0.05%) | 34.48%     | 10 (0.02%) | 48.28%     | 5.21 | 00:09:28 | 0.00%      | 0 (0.00%) | \$0.00 (0.00%) |



| Rank | Device                                        | OS            | Market Share | RAM     | Storage    | Price  | Time | OS       | OS    | Price     |                |
|------|-----------------------------------------------|---------------|--------------|---------|------------|--------|------|----------|-------|-----------|----------------|
| 209. | Acer B1-A71<br>Iconia B1-A71                  | Android       | 28 (0.05%)   | 57.14%  | 16 (0.04%) | 50.00% | 5.61 | 00:02:19 | 0.00% | 0 (0.00%) | \$0.00 (0.00%) |
| 210. | LG P714<br>Optimus L7X                        | Android       | 28 (0.05%)   | 64.29%  | 18 (0.04%) | 57.14% | 3.11 | 00:03:44 | 0.00% | 0 (0.00%) | \$0.00 (0.00%) |
| 211. | Motorola MB865<br>Atrix 2                     | Android       | 28 (0.05%)   | 35.71%  | 10 (0.02%) | 42.86% | 6.75 | 00:05:53 | 0.00% | 0 (0.00%) | \$0.00 (0.00%) |
| 212. | Nokia 306 Asha<br>306                         | Symbian       | 28 (0.05%)   | 92.86%  | 26 (0.06%) | 75.00% | 1.82 | 00:00:47 | 0.00% | 0 (0.00%) | \$0.00 (0.00%) |
| 213. | Nokia 501 Asha<br>501                         | Symbian       | 28 (0.05%)   | 92.86%  | 26 (0.06%) | 75.00% | 1.32 | 00:00:54 | 0.00% | 0 (0.00%) | \$0.00 (0.00%) |
| 214. | Nokia Lumia 625                               | Windows Phone | 28 (0.05%)   | 82.14%  | 23 (0.06%) | 46.43% | 3.43 | 00:02:17 | 0.00% | 0 (0.00%) | \$0.00 (0.00%) |
| 215. | Asus ME371MG<br>Fonepad<br>ME371MG            | Android       | 27 (0.04%)   | 55.56%  | 15 (0.04%) | 44.44% | 6.26 | 00:05:23 | 0.00% | 0 (0.00%) | \$0.00 (0.00%) |
| 216. | HTC 9292 EVO<br>4G                            | Android       | 27 (0.04%)   | 33.33%  | 9 (0.02%)  | 44.44% | 2.19 | 00:01:59 | 0.00% | 0 (0.00%) | \$0.00 (0.00%) |
| 217. | Huawei G510-<br>0251 Ascend                   | Android       | 27 (0.04%)   | 66.67%  | 18 (0.04%) | 44.44% | 5.74 | 00:04:11 | 0.00% | 0 (0.00%) | \$0.00 (0.00%) |
| 218. | LG E612f<br>Optimus L5                        | Android       | 27 (0.04%)   | 96.30%  | 26 (0.06%) | 59.26% | 4.30 | 00:06:37 | 0.00% | 0 (0.00%) | \$0.00 (0.00%) |
| 219. | Motorola xt875<br>Droid Bionic                | Android       | 27 (0.04%)   | 66.67%  | 18 (0.04%) | 48.15% | 3.81 | 00:05:49 | 0.00% | 0 (0.00%) | \$0.00 (0.00%) |
| 220. | Samsung GT-<br>S7500 Galaxy<br>Ace Plus       | Android       | 27 (0.04%)   | 62.96%  | 17 (0.04%) | 55.56% | 2.56 | 00:03:54 | 0.00% | 0 (0.00%) | \$0.00 (0.00%) |
| 221. | Samsung GT-<br>S7562L Galaxy S<br>Duos        | Android       | 27 (0.04%)   | 77.78%  | 21 (0.05%) | 37.04% | 4.19 | 00:04:34 | 0.00% | 0 (0.00%) | \$0.00 (0.00%) |
| 222. | SonyEricsson<br>LT18i Xperia Arc              | Android       | 27 (0.04%)   | 81.48%  | 22 (0.05%) | 88.89% | 1.70 | 00:00:54 | 0.00% | 0 (0.00%) | \$0.00 (0.00%) |
| 223. | Amazon KFAPW<br>Kindle Fire HDX<br>8.9        | Android       | 26 (0.04%)   | 23.08%  | 6 (0.01%)  | 80.77% | 3.15 | 00:00:56 | 0.00% | 0 (0.00%) | \$0.00 (0.00%) |
| 224. | Asus ME172V<br>MeMO Pad<br>ME172V             | Android       | 26 (0.04%)   | 53.85%  | 14 (0.03%) | 69.23% | 2.73 | 00:02:20 | 0.00% | 0 (0.00%) | \$0.00 (0.00%) |
| 225. | LG F320S G2                                   | Android       | 26 (0.04%)   | 11.54%  | 3 (0.01%)  | 50.00% | 3.85 | 00:04:28 | 0.00% | 0 (0.00%) | \$0.00 (0.00%) |
| 226. | LG P705g<br>Optimus L7                        | Android       | 26 (0.04%)   | 57.69%  | 15 (0.04%) | 50.00% | 4.69 | 00:06:03 | 0.00% | 0 (0.00%) | \$0.00 (0.00%) |
| 227. | Nokia C2-03                                   | Symbian       | 26 (0.04%)   | 100.00% | 26 (0.06%) | 53.85% | 1.85 | 00:00:50 | 0.00% | 0 (0.00%) | \$0.00 (0.00%) |
| 228. | Nokia N73                                     | Symbian       | 26 (0.04%)   | 92.31%  | 24 (0.06%) | 76.92% | 1.85 | 00:01:22 | 0.00% | 0 (0.00%) | \$0.00 (0.00%) |
| 229. | Nokia N8-00 N8                                | Symbian       | 26 (0.04%)   | 100.00% | 26 (0.06%) | 69.23% | 3.38 | 00:01:46 | 0.00% | 0 (0.00%) | \$0.00 (0.00%) |
| 230. | Sony ST23i<br>Xperia miro                     | Android       | 26 (0.04%)   | 80.77%  | 21 (0.05%) | 73.08% | 1.46 | 00:00:37 | 0.00% | 0 (0.00%) | \$0.00 (0.00%) |
| 231. | BlackBerry 9930                               | OS            | 25 (0.04%)   | 84.00%  | 21 (0.05%) | 68.00% | 1.52 | 00:02:03 | 0.00% | 0 (0.00%) | \$0.00 (0.00%) |
| 232. | HTC Desire                                    | Android       | 25 (0.04%)   | 44.00%  | 11 (0.03%) | 64.00% | 8.28 | 00:09:37 | 0.00% | 0 (0.00%) | \$0.00 (0.00%) |
| 233. | Nokia 300 Asha<br>300                         | Symbian       | 25 (0.04%)   | 100.00% | 25 (0.06%) | 92.00% | 1.52 | 00:01:04 | 0.00% | 0 (0.00%) | \$0.00 (0.00%) |
| 234. | Nokia Asha 210<br>Asha 210                    | Symbian       | 25 (0.04%)   | 96.00%  | 24 (0.06%) | 80.00% | 2.08 | 00:01:16 | 0.00% | 0 (0.00%) | \$0.00 (0.00%) |
| 235. | Nokia E5-00<br>Mystic                         | Symbian       | 25 (0.04%)   | 100.00% | 25 (0.06%) | 56.00% | 2.44 | 00:04:15 | 0.00% | 0 (0.00%) | \$0.00 (0.00%) |
| 236. | Samsung GT-<br>I9001                          | Android       | 25 (0.04%)   | 64.00%  | 16 (0.04%) | 56.00% | 2.84 | 00:03:07 | 0.00% | 0 (0.00%) | \$0.00 (0.00%) |
| 237. | Samsung GT-<br>N8013 Galaxy<br>Note 10.1 WiFi | Android       | 25 (0.04%)   | 76.00%  | 19 (0.05%) | 60.00% | 2.36 | 00:04:32 | 0.00% | 0 (0.00%) | \$0.00 (0.00%) |
| 238. | Samsung GT-<br>S5302 Galaxy                   | Android       | 25 (0.04%)   | 84.00%  | 21 (0.05%) | 56.00% | 1.96 | 00:00:52 | 0.00% | 0 (0.00%) | \$0.00 (0.00%) |

| Pocket Duos |                                           | Count      | Percentage | Count      | Percentage | Weight | Time     | Percentage | Count     | Percentage     |
|-------------|-------------------------------------------|------------|------------|------------|------------|--------|----------|------------|-----------|----------------|
| 239.        | Samsung SM-P600 Galaxy Note 10.1 2014     | 25 (0.04%) | 76.00%     | 19 (0.05%) | 56.00%     | 2.60   | 00:00:33 | 0.00%      | 0 (0.00%) | \$0.00 (0.00%) |
| 240.        | Sony C1504 Xperia E                       | 25 (0.04%) | 68.00%     | 17 (0.04%) | 44.00%     | 2.76   | 00:03:09 | 0.00%      | 0 (0.00%) | \$0.00 (0.00%) |
| 241.        | Motorola XT894 Droid 4                    | 24 (0.04%) | 87.50%     | 21 (0.05%) | 62.50%     | 3.08   | 00:01:05 | 0.00%      | 0 (0.00%) | \$0.00 (0.00%) |
| 242.        | Nokia 305                                 | 24 (0.04%) | 100.00%    | 24 (0.06%) | 83.33%     | 2.50   | 00:02:32 | 0.00%      | 0 (0.00%) | \$0.00 (0.00%) |
| 243.        | Nokia X2-01                               | 24 (0.04%) | 100.00%    | 24 (0.06%) | 75.00%     | 1.54   | 00:01:11 | 0.00%      | 0 (0.00%) | \$0.00 (0.00%) |
| 244.        | Samsung GT-I8150 Galaxy W                 | 24 (0.04%) | 58.33%     | 14 (0.03%) | 62.50%     | 3.42   | 00:01:11 | 0.00%      | 0 (0.00%) | \$0.00 (0.00%) |
| 245.        | Samsung GT-S6500D Galaxy Mini 2           | 24 (0.04%) | 87.50%     | 21 (0.05%) | 75.00%     | 1.62   | 00:00:23 | 0.00%      | 0 (0.00%) | \$0.00 (0.00%) |
| 246.        | Samsung SPH-D710 Galaxy SII Epic 4G Touch | 24 (0.04%) | 87.50%     | 21 (0.05%) | 70.83%     | 1.62   | 00:00:47 | 0.00%      | 0 (0.00%) | \$0.00 (0.00%) |
| 247.        | Sony ST21i Xperia Tipo                    | 24 (0.04%) | 70.83%     | 17 (0.04%) | 75.00%     | 2.42   | 00:00:38 | 0.00%      | 0 (0.00%) | \$0.00 (0.00%) |
| 248.        | Asus TF700T Transformer Pad TF700T        | 23 (0.04%) | 82.61%     | 19 (0.05%) | 60.87%     | 2.22   | 00:00:31 | 0.00%      | 0 (0.00%) | \$0.00 (0.00%) |
| 249.        | LG P760 Optimus L9                        | 23 (0.04%) | 86.96%     | 20 (0.05%) | 82.61%     | 1.39   | 00:01:04 | 0.00%      | 0 (0.00%) | \$0.00 (0.00%) |
| 250.        | Motorola XT1053 Moto X                    | 23 (0.04%) | 60.87%     | 14 (0.03%) | 52.17%     | 5.26   | 00:04:26 | 0.00%      | 0 (0.00%) | \$0.00 (0.00%) |
| 251.        | Motorola XT920 RAZR D3                    | 23 (0.04%) | 52.17%     | 12 (0.03%) | 69.57%     | 2.65   | 00:01:24 | 0.00%      | 0 (0.00%) | \$0.00 (0.00%) |
| 252.        | Samsung GT-P5113 Galaxy Tab 2 10.1 WiFi   | 23 (0.04%) | 69.57%     | 16 (0.04%) | 52.17%     | 4.87   | 00:08:57 | 0.00%      | 0 (0.00%) | \$0.00 (0.00%) |
| 253.        | Samsung SGH-I337M Galaxy S IV             | 23 (0.04%) | 73.91%     | 17 (0.04%) | 65.22%     | 3.22   | 00:00:52 | 0.00%      | 0 (0.00%) | \$0.00 (0.00%) |
| 254.        | Motorola MZ604 Xoom                       | 22 (0.04%) | 31.82%     | 7 (0.02%)  | 63.64%     | 3.73   | 00:02:01 | 0.00%      | 0 (0.00%) | \$0.00 (0.00%) |
| 255.        | Samsung GT-S6310 Galaxy Young             | 22 (0.04%) | 77.27%     | 17 (0.04%) | 54.55%     | 2.91   | 00:03:31 | 0.00%      | 0 (0.00%) | \$0.00 (0.00%) |
| 256.        | Samsung GT-S6500 Galaxy Mini 2            | 22 (0.04%) | 72.73%     | 16 (0.04%) | 81.82%     | 2.23   | 00:00:57 | 0.00%      | 0 (0.00%) | \$0.00 (0.00%) |
| 257.        | Samsung SCH-I747 Galaxy S III             | 22 (0.04%) | 63.64%     | 14 (0.03%) | 54.55%     | 4.91   | 00:01:47 | 0.00%      | 0 (0.00%) | \$0.00 (0.00%) |
| 258.        | Amazon KFJWI Kindle Fire HD 8.9           | 21 (0.03%) | 95.24%     | 20 (0.05%) | 66.67%     | 2.95   | 00:01:01 | 0.00%      | 0 (0.00%) | \$0.00 (0.00%) |
| 259.        | HTC Z710 Sensation                        | 21 (0.03%) | 57.14%     | 12 (0.03%) | 76.19%     | 1.81   | 00:01:30 | 0.00%      | 0 (0.00%) | \$0.00 (0.00%) |
| 260.        | Huawei Y210-0151 Ascend Y210              | 21 (0.03%) | 66.67%     | 14 (0.03%) | 52.38%     | 4.33   | 00:07:14 | 0.00%      | 0 (0.00%) | \$0.00 (0.00%) |
| 261.        | Motorola XT615                            | 21 (0.03%) | 90.48%     | 19 (0.05%) | 66.67%     | 1.95   | 00:02:37 | 0.00%      | 0 (0.00%) | \$0.00 (0.00%) |
| 262.        | Samsung GT-I9100P Galaxy S II NFC         | 21 (0.03%) | 95.24%     | 20 (0.05%) | 80.95%     | 1.71   | 00:00:25 | 0.00%      | 0 (0.00%) | \$0.00 (0.00%) |
| 263.        | Samsung GT-S5839i Galaxy Ace              | 21 (0.03%) | 100.00%    | 21 (0.05%) | 85.71%     | 1.33   | 00:00:16 | 0.00%      | 0 (0.00%) | \$0.00 (0.00%) |
| 264.        | Samsung SPH-L710 Galaxy SIII              | 21 (0.03%) | 80.95%     | 17 (0.04%) | 61.90%     | 3.05   | 00:00:55 | 0.00%      | 0 (0.00%) | \$0.00 (0.00%) |
| 265.        | Toshiba AT300                             | 21 (0.03%) | 80.95%     | 17 (0.04%) | 61.90%     | 3.05   | 00:00:55 | 0.00%      | 0 (0.00%) | \$0.00 (0.00%) |

|      |                                         |            |         |            |        |       |          |       |           |                |
|------|-----------------------------------------|------------|---------|------------|--------|-------|----------|-------|-----------|----------------|
| 265. | Toshiba AT300 Regza AT300               | 21 (0.03%) | 38.10%  | 8 (0.02%)  | 71.43% | 3.19  | 00:01:31 | 0.00% | 0 (0.00%) | \$0.00 (0.00%) |
| 266. | Lenovo IdeaTab S6000-H                  | 20 (0.03%) | 50.00%  | 10 (0.02%) | 65.00% | 2.80  | 00:02:29 | 0.00% | 0 (0.00%) | \$0.00 (0.00%) |
| 267. | LG E450f Optimus L5 II                  | 20 (0.03%) | 65.00%  | 13 (0.03%) | 50.00% | 3.35  | 00:03:34 | 0.00% | 0 (0.00%) | \$0.00 (0.00%) |
| 268. | Micromax A110 Superfone Canvas 2        | 20 (0.03%) | 80.00%  | 16 (0.04%) | 80.00% | 1.70  | 00:00:20 | 0.00% | 0 (0.00%) | \$0.00 (0.00%) |
| 269. | Samsung GT-I9105P Galaxy SII Plus       | 20 (0.03%) | 85.00%  | 17 (0.04%) | 80.00% | 1.70  | 00:00:36 | 0.00% | 0 (0.00%) | \$0.00 (0.00%) |
| 270. | Samsung GT-P6200 GALAXY Tab 7.0 Plus    | 20 (0.03%) | 75.00%  | 15 (0.04%) | 80.00% | 1.20  | 00:00:24 | 0.00% | 0 (0.00%) | \$0.00 (0.00%) |
| 271. | Samsung SGH-I537 Galaxy S4 Active       | 20 (0.03%) | 70.00%  | 14 (0.03%) | 70.00% | 4.50  | 00:04:26 | 0.00% | 0 (0.00%) | \$0.00 (0.00%) |
| 272. | ZTE V768 Concord                        | 20 (0.03%) | 70.00%  | 14 (0.03%) | 65.00% | 1.95  | 00:00:35 | 0.00% | 0 (0.00%) | \$0.00 (0.00%) |
| 273. | BlackBerry Z10                          | 19 (0.03%) | 78.95%  | 15 (0.04%) | 52.63% | 2.58  | 00:01:26 | 0.00% | 0 (0.00%) | \$0.00 (0.00%) |
| 274. | Feiteng GT-I930C                        | 19 (0.03%) | 73.68%  | 14 (0.03%) | 68.42% | 2.11  | 00:01:24 | 0.00% | 0 (0.00%) | \$0.00 (0.00%) |
| 275. | Huawei S7-301w MediaPad 10 Link         | 19 (0.03%) | 42.11%  | 8 (0.02%)  | 21.05% | 6.53  | 00:03:14 | 0.00% | 0 (0.00%) | \$0.00 (0.00%) |
| 276. | Motorola XT303 Motosmart Me             | 19 (0.03%) | 84.21%  | 16 (0.04%) | 63.16% | 4.53  | 00:02:56 | 0.00% | 0 (0.00%) | \$0.00 (0.00%) |
| 277. | Nokia 206                               | 19 (0.03%) | 94.74%  | 18 (0.04%) | 84.21% | 1.26  | 00:00:11 | 0.00% | 0 (0.00%) | \$0.00 (0.00%) |
| 278. | Samsung GT-P7300 Galaxy Tab 8.9         | 19 (0.03%) | 84.21%  | 16 (0.04%) | 78.95% | 1.84  | 00:00:32 | 0.00% | 0 (0.00%) | \$0.00 (0.00%) |
| 279. | Samsung GT-S5830D Galaxy Ace            | 19 (0.03%) | 26.32%  | 5 (0.01%)  | 47.37% | 8.53  | 00:10:14 | 0.00% | 0 (0.00%) | \$0.00 (0.00%) |
| 280. | Samsung SGH-I747 Galaxy SIII            | 19 (0.03%) | 68.42%  | 13 (0.03%) | 52.63% | 9.32  | 00:06:17 | 0.00% | 0 (0.00%) | \$0.00 (0.00%) |
| 281. | SonyEricsson LT15i Xperia Arc           | 19 (0.03%) | 68.42%  | 13 (0.03%) | 78.95% | 1.47  | 00:01:36 | 0.00% | 0 (0.00%) | \$0.00 (0.00%) |
| 282. | SonyEricsson MT11i Xperia Neo V         | 19 (0.03%) | 89.47%  | 17 (0.04%) | 63.16% | 2.26  | 00:00:33 | 0.00% | 0 (0.00%) | \$0.00 (0.00%) |
| 283. | SonyEricsson WT19i Live                 | 19 (0.03%) | 47.37%  | 9 (0.02%)  | 89.47% | 2.84  | 00:03:22 | 0.00% | 0 (0.00%) | \$0.00 (0.00%) |
| 284. | Barnes and Noble BNTV400 Nook HD Tablet | 18 (0.03%) | 66.67%  | 12 (0.03%) | 72.22% | 4.94  | 00:02:13 | 0.00% | 0 (0.00%) | \$0.00 (0.00%) |
| 285. | HTC ADR6350 Droid Incredible 2          | 18 (0.03%) | 72.22%  | 13 (0.03%) | 66.67% | 4.56  | 00:02:37 | 0.00% | 0 (0.00%) | \$0.00 (0.00%) |
| 286. | LG E510 Optimus Hub                     | 18 (0.03%) | 33.33%  | 6 (0.01%)  | 16.67% | 14.28 | 00:21:53 | 0.00% | 0 (0.00%) | \$0.00 (0.00%) |
| 287. | LG P350 Optimus Me                      | 18 (0.03%) | 61.11%  | 11 (0.03%) | 55.56% | 2.28  | 00:03:04 | 0.00% | 0 (0.00%) | \$0.00 (0.00%) |
| 288. | Nokia C6-01                             | 18 (0.03%) | 100.00% | 18 (0.04%) | 5.56%  | 7.39  | 00:31:50 | 0.00% | 0 (0.00%) | \$0.00 (0.00%) |
| 289. | Samsung GT-S5300B Galaxy Pocket         | 18 (0.03%) | 61.11%  | 11 (0.03%) | 50.00% | 3.56  | 00:04:54 | 0.00% | 0 (0.00%) | \$0.00 (0.00%) |
| 290. | Samsung GT-S5301L Galaxy Pocket Plus    | 18 (0.03%) | 50.00%  | 9 (0.02%)  | 55.56% | 3.89  | 00:02:15 | 0.00% | 0 (0.00%) | \$0.00 (0.00%) |
| 291. | Samsung GT-S5570I Galaxy Pop Plus       | 18 (0.03%) | 94.44%  | 17 (0.04%) | 44.44% | 5.22  | 00:08:58 | 0.00% | 0 (0.00%) | \$0.00 (0.00%) |
| 292. | Samsung SGH-T9000                       | 18 (0.03%) | 61.11%  | 11 (0.03%) | 50.00% | 3.56  | 00:04:54 | 0.00% | 0 (0.00%) | \$0.00 (0.00%) |

|      |                                              |            |         |            |         |      |          |       |           |                |
|------|----------------------------------------------|------------|---------|------------|---------|------|----------|-------|-----------|----------------|
| 292. | T599N                                        | 18 (0.03%) | 72.22%  | 13 (0.03%) | 72.22%  | 3.67 | 00:01:29 | 0.00% | 0 (0.00%) | \$0.00 (0.00%) |
| 293. | Samsung SGH-T889 Galaxy Note II              | 18 (0.03%) | 100.00% | 18 (0.04%) | 66.67%  | 1.50 | 00:00:12 | 0.00% | 0 (0.00%) | \$0.00 (0.00%) |
| 294. | Samsung SPH-L900 Galaxy Note II              | 18 (0.03%) | 94.44%  | 17 (0.04%) | 83.33%  | 2.56 | 00:01:12 | 0.00% | 0 (0.00%) | \$0.00 (0.00%) |
| 295. | Sony C1905 Xperia M                          | 18 (0.03%) | 72.22%  | 13 (0.03%) | 72.22%  | 2.33 | 00:01:05 | 0.00% | 0 (0.00%) | \$0.00 (0.00%) |
| 296. | Sony ST23a Xperia miro                       | 18 (0.03%) | 66.67%  | 12 (0.03%) | 33.33%  | 4.33 | 00:05:29 | 0.00% | 0 (0.00%) | \$0.00 (0.00%) |
| 297. | Acer A700                                    | 17 (0.03%) | 47.06%  | 8 (0.02%)  | 76.47%  | 2.18 | 00:00:46 | 0.00% | 0 (0.00%) | \$0.00 (0.00%) |
| 298. | Asus ME301T MeMO Pad Smart 10                | 17 (0.03%) | 76.47%  | 13 (0.03%) | 70.59%  | 2.06 | 00:00:46 | 0.00% | 0 (0.00%) | \$0.00 (0.00%) |
| 299. | BlackBerry 9380 Blackberry 9380 Curve        | 17 (0.03%) | 76.47%  | 13 (0.03%) | 70.59%  | 1.82 | 00:01:42 | 0.00% | 0 (0.00%) | \$0.00 (0.00%) |
| 300. | Huawei U8667                                 | 17 (0.03%) | 35.29%  | 6 (0.01%)  | 58.82%  | 2.71 | 00:03:29 | 0.00% | 0 (0.00%) | \$0.00 (0.00%) |
| 301. | Lenovo A1000-F                               | 17 (0.03%) | 41.18%  | 7 (0.02%)  | 64.71%  | 3.35 | 00:02:05 | 0.00% | 0 (0.00%) | \$0.00 (0.00%) |
| 302. | LG P500h Optimus One                         | 17 (0.03%) | 70.59%  | 12 (0.03%) | 58.82%  | 3.00 | 00:02:58 | 0.00% | 0 (0.00%) | \$0.00 (0.00%) |
| 303. | Motorola XT1080 Ultra                        | 17 (0.03%) | 76.47%  | 13 (0.03%) | 58.82%  | 3.06 | 00:02:36 | 0.00% | 0 (0.00%) | \$0.00 (0.00%) |
| 304. | Samsung GT-I9100G Galaxy S II                | 17 (0.03%) | 70.59%  | 12 (0.03%) | 70.59%  | 1.76 | 00:00:32 | 0.00% | 0 (0.00%) | \$0.00 (0.00%) |
| 305. | Samsung GT-I9305 Galaxy S3 LTE International | 17 (0.03%) | 94.12%  | 16 (0.04%) | 88.24%  | 1.59 | 00:00:35 | 0.00% | 0 (0.00%) | \$0.00 (0.00%) |
| 306. | Samsung SGH-T999 Galaxy SIII                 | 17 (0.03%) | 76.47%  | 13 (0.03%) | 47.06%  | 4.71 | 00:04:07 | 0.00% | 0 (0.00%) | \$0.00 (0.00%) |
| 307. | Sony ST21i2 Xperia Tipo Dual                 | 17 (0.03%) | 52.94%  | 9 (0.02%)  | 64.71%  | 2.29 | 00:02:00 | 0.00% | 0 (0.00%) | \$0.00 (0.00%) |
| 308. | SonyEricsson C6602 Xperia Z                  | 17 (0.03%) | 82.35%  | 14 (0.03%) | 76.47%  | 1.82 | 00:02:36 | 0.00% | 0 (0.00%) | \$0.00 (0.00%) |
| 309. | SonyEricsson WT19a Live                      | 17 (0.03%) | 76.47%  | 13 (0.03%) | 58.82%  | 8.82 | 00:12:41 | 0.00% | 0 (0.00%) | \$0.00 (0.00%) |
| 310. | LG E400 Optimus L3                           | 16 (0.03%) | 93.75%  | 15 (0.04%) | 56.25%  | 7.25 | 00:09:14 | 0.00% | 0 (0.00%) | \$0.00 (0.00%) |
| 311. | Micromax A116 Canvas HD                      | 16 (0.03%) | 75.00%  | 12 (0.03%) | 62.50%  | 2.94 | 00:05:21 | 0.00% | 0 (0.00%) | \$0.00 (0.00%) |
| 312. | Motorola XT910 RAZR XT910 Spider             | 16 (0.03%) | 87.50%  | 14 (0.03%) | 87.50%  | 1.19 | 00:00:11 | 0.00% | 0 (0.00%) | \$0.00 (0.00%) |
| 313. | Nokia 114                                    | 16 (0.03%) | 93.75%  | 15 (0.04%) | 56.25%  | 2.94 | 00:02:45 | 0.00% | 0 (0.00%) | \$0.00 (0.00%) |
| 314. | Samsung GT-I9195L Galaxy S4 Mini             | 16 (0.03%) | 87.50%  | 14 (0.03%) | 50.00%  | 3.12 | 00:03:20 | 0.00% | 0 (0.00%) | \$0.00 (0.00%) |
| 315. | Samsung GT-S6802 Galaxy Ace Duos             | 16 (0.03%) | 93.75%  | 15 (0.04%) | 68.75%  | 1.94 | 00:01:03 | 0.00% | 0 (0.00%) | \$0.00 (0.00%) |
| 316. | Samsung SM-N900 Galaxy Note 3                | 16 (0.03%) | 87.50%  | 14 (0.03%) | 81.25%  | 2.00 | 00:00:36 | 0.00% | 0 (0.00%) | \$0.00 (0.00%) |
| 317. | Sony SO-04D Xperia GX SO-04D for DoCoMo      | 16 (0.03%) | 25.00%  | 4 (0.01%)  | 37.50%  | 7.44 | 00:03:45 | 0.00% | 0 (0.00%) | \$0.00 (0.00%) |
| 318. | Sprint X325c/APX325CKT EVO 4G LTE            | 16 (0.03%) | 81.25%  | 13 (0.03%) | 68.75%  | 1.94 | 00:00:42 | 0.00% | 0 (0.00%) | \$0.00 (0.00%) |
| 319. | ZTE N9120 Avid 4G                            | 16 (0.03%) | 56.25%  | 9 (0.02%)  | 100.00% | 1.00 | 00:00:00 | 0.00% | 0 (0.00%) | \$0.00 (0.00%) |

| Rank | Device                                       | Reviews    | Rating  | Price      | Score  | Price | Time     | Crash | Crash     | Crash          |
|------|----------------------------------------------|------------|---------|------------|--------|-------|----------|-------|-----------|----------------|
| 320. | BlackBerry 9860 Monza                        | 15 (0.02%) | 86.67%  | 13 (0.03%) | 66.67% | 4.40  | 00:04:34 | 0.00% | 0 (0.00%) | \$0.00 (0.00%) |
| 321. | LG D802 G2                                   | 15 (0.02%) | 93.33%  | 14 (0.03%) | 93.33% | 1.07  | 00:00:21 | 0.00% | 0 (0.00%) | \$0.00 (0.00%) |
| 322. | Nokia 5800 XpressMusic XpressMusic           | 15 (0.02%) | 93.33%  | 14 (0.03%) | 86.67% | 1.13  | 00:00:40 | 0.00% | 0 (0.00%) | \$0.00 (0.00%) |
| 323. | Samsung GT-I8530                             | 15 (0.02%) | 66.67%  | 10 (0.02%) | 53.33% | 13.33 | 00:13:14 | 0.00% | 0 (0.00%) | \$0.00 (0.00%) |
| 324. | Samsung GT-I8552 Galaxy Grand Quattro        | 15 (0.02%) | 100.00% | 15 (0.04%) | 93.33% | 1.20  | 00:00:13 | 0.00% | 0 (0.00%) | \$0.00 (0.00%) |
| 325. | Samsung GT-I9205 Galaxy Mega 6.3             | 15 (0.02%) | 60.00%  | 9 (0.02%)  | 93.33% | 1.07  | 00:00:02 | 0.00% | 0 (0.00%) | \$0.00 (0.00%) |
| 326. | Samsung GT-S5300 Galaxy Pocket               | 15 (0.02%) | 86.67%  | 13 (0.03%) | 73.33% | 2.07  | 00:01:10 | 0.00% | 0 (0.00%) | \$0.00 (0.00%) |
| 327. | Samsung GT-S5670 Galaxy Fit                  | 15 (0.02%) | 80.00%  | 12 (0.03%) | 60.00% | 3.20  | 00:01:44 | 0.00% | 0 (0.00%) | \$0.00 (0.00%) |
| 328. | Samsung GT-S6312 Galaxy Young                | 15 (0.02%) | 53.33%  | 8 (0.02%)  | 60.00% | 1.80  | 00:02:06 | 0.00% | 0 (0.00%) | \$0.00 (0.00%) |
| 329. | Samsung SPH-D710BST Galaxy SII Epic 4G Touch | 15 (0.02%) | 60.00%  | 9 (0.02%)  | 66.67% | 5.20  | 00:04:31 | 0.00% | 0 (0.00%) | \$0.00 (0.00%) |
| 330. | Samsung SPH-L720 Galaxy S IV                 | 15 (0.02%) | 86.67%  | 13 (0.03%) | 66.67% | 2.20  | 00:00:28 | 0.00% | 0 (0.00%) | \$0.00 (0.00%) |
| 331. | Samsung YP-G70 Galaxy Player 5               | 15 (0.02%) | 73.33%  | 11 (0.03%) | 66.67% | 4.93  | 00:03:05 | 0.00% | 0 (0.00%) | \$0.00 (0.00%) |
| 332. | Sony LT25i Xperia V                          | 15 (0.02%) | 93.33%  | 14 (0.03%) | 80.00% | 1.47  | 00:00:20 | 0.00% | 0 (0.00%) | \$0.00 (0.00%) |
| 333. | SonyEricsson E15a Xperia X8                  | 15 (0.02%) | 93.33%  | 14 (0.03%) | 60.00% | 2.53  | 00:04:28 | 0.00% | 0 (0.00%) | \$0.00 (0.00%) |
| 334. | Toshiba AT100                                | 15 (0.02%) | 73.33%  | 11 (0.03%) | 60.00% | 3.00  | 00:01:20 | 0.00% | 0 (0.00%) | \$0.00 (0.00%) |
| 335. | Acer A200 Picasso_E                          | 14 (0.02%) | 71.43%  | 10 (0.02%) | 64.29% | 3.71  | 00:08:02 | 0.00% | 0 (0.00%) | \$0.00 (0.00%) |
| 336. | Asus TF300TG Transformer Pad TF300T          | 14 (0.02%) | 42.86%  | 6 (0.01%)  | 42.86% | 3.36  | 00:01:19 | 0.00% | 0 (0.00%) | \$0.00 (0.00%) |
| 337. | HTC A310e Explorer                           | 14 (0.02%) | 92.86%  | 13 (0.03%) | 64.29% | 1.64  | 00:02:30 | 0.00% | 0 (0.00%) | \$0.00 (0.00%) |
| 338. | HTC Inspire 4G                               | 14 (0.02%) | 85.71%  | 12 (0.03%) | 64.29% | 1.64  | 00:00:16 | 0.00% | 0 (0.00%) | \$0.00 (0.00%) |
| 339. | Huawei P6-U06 Ascend P6                      | 14 (0.02%) | 71.43%  | 10 (0.02%) | 57.14% | 5.00  | 00:04:55 | 0.00% | 0 (0.00%) | \$0.00 (0.00%) |
| 340. | LG E410 Optimus L1 II                        | 14 (0.02%) | 28.57%  | 4 (0.01%)  | 57.14% | 1.50  | 00:01:26 | 0.00% | 0 (0.00%) | \$0.00 (0.00%) |
| 341. | RIM KBD                                      | 14 (0.02%) | 92.86%  | 13 (0.03%) | 78.57% | 1.50  | 00:00:30 | 0.00% | 0 (0.00%) | \$0.00 (0.00%) |
| 342. | Samsung GT-I9003 Galaxy SL                   | 14 (0.02%) | 85.71%  | 12 (0.03%) | 78.57% | 1.64  | 00:00:19 | 0.00% | 0 (0.00%) | \$0.00 (0.00%) |
| 343. | Samsung GT-I9152 Galaxy Mega 5.8             | 14 (0.02%) | 100.00% | 14 (0.03%) | 64.29% | 1.86  | 00:02:11 | 0.00% | 0 (0.00%) | \$0.00 (0.00%) |
| 344. | Samsung GT-I9305T Galaxy S3 LTE              | 14 (0.02%) | 92.86%  | 13 (0.03%) | 78.57% | 1.79  | 00:02:42 | 0.00% | 0 (0.00%) | \$0.00 (0.00%) |
| 345. | Samsung GT-N5120 Galaxy Note 8.0 LTE         | 14 (0.02%) | 35.71%  | 5 (0.01%)  | 64.29% | 3.21  | 00:02:13 | 0.00% | 0 (0.00%) | \$0.00 (0.00%) |
| 346. | Samsung SCH-R720 Admire                      | 14 (0.02%) | 57.14%  | 8 (0.02%)  | 92.86% | 1.43  | 00:00:12 | 0.00% | 0 (0.00%) | \$0.00 (0.00%) |

|      |                                       |            |         |            |        |      |          |       |           |                |
|------|---------------------------------------|------------|---------|------------|--------|------|----------|-------|-----------|----------------|
| 347. | Samsung SM-N900A Galaxy Note 3        | 14 (0.02%) | 100.00% | 14 (0.03%) | 85.71% | 1.71 | 00:00:15 | 0.00% | 0 (0.00%) | \$0.00 (0.00%) |
| 348. | Asus Eee Pad TF201 Transformer Prime  | 13 (0.02%) | 92.31%  | 12 (0.03%) | 84.62% | 1.69 | 00:00:15 | 0.00% | 0 (0.00%) | \$0.00 (0.00%) |
| 349. | BlackBerry 9650 Bold                  | 13 (0.02%) | 92.31%  | 12 (0.03%) | 46.15% | 2.00 | 00:03:28 | 0.00% | 0 (0.00%) | \$0.00 (0.00%) |
| 350. | DoCoMo SO-04C Xperia GX               | 13 (0.02%) | 76.92%  | 10 (0.02%) | 76.92% | 1.77 | 00:01:08 | 0.00% | 0 (0.00%) | \$0.00 (0.00%) |
| 351. | HTC 1000C Desire C                    | 13 (0.02%) | 46.15%  | 6 (0.01%)  | 69.23% | 1.38 | 00:01:27 | 0.00% | 0 (0.00%) | \$0.00 (0.00%) |
| 352. | Motorola MB526                        | 13 (0.02%) | 61.54%  | 8 (0.02%)  | 69.23% | 3.54 | 00:05:14 | 0.00% | 0 (0.00%) | \$0.00 (0.00%) |
| 353. | Motorola MB612 XPRT                   | 13 (0.02%) | 7.69%   | 1 (0.00%)  | 46.15% | 2.38 | 00:09:26 | 0.00% | 0 (0.00%) | \$0.00 (0.00%) |
| 354. | Nokia 500                             | 13 (0.02%) | 100.00% | 13 (0.03%) | 53.85% | 2.08 | 00:01:04 | 0.00% | 0 (0.00%) | \$0.00 (0.00%) |
| 355. | Samsung GT-B5510L Galaxy Y Pro        | 13 (0.02%) | 46.15%  | 6 (0.01%)  | 30.77% | 3.92 | 00:06:04 | 0.00% | 0 (0.00%) | \$0.00 (0.00%) |
| 356. | Samsung GT-C3312R Rex 60 Duos         | 13 (0.02%) | 69.23%  | 9 (0.02%)  | 69.23% | 1.62 | 00:01:12 | 0.00% | 0 (0.00%) | \$0.00 (0.00%) |
| 357. | Samsung GT-I8160P Galaxy Ace 2 NFC    | 13 (0.02%) | 84.62%  | 11 (0.03%) | 84.62% | 1.31 | 00:00:05 | 0.00% | 0 (0.00%) | \$0.00 (0.00%) |
| 358. | Samsung GT-I8260L Galaxy Core         | 13 (0.02%) | 61.54%  | 8 (0.02%)  | 30.77% | 4.15 | 00:01:27 | 0.00% | 0 (0.00%) | \$0.00 (0.00%) |
| 359. | Samsung GT-P6800 Galaxy Tab 7.7       | 13 (0.02%) | 61.54%  | 8 (0.02%)  | 53.85% | 2.92 | 00:07:43 | 0.00% | 0 (0.00%) | \$0.00 (0.00%) |
| 360. | Samsung GT-S5301 Galaxy Pocket Plus   | 13 (0.02%) | 100.00% | 13 (0.03%) | 69.23% | 1.69 | 00:00:46 | 0.00% | 0 (0.00%) | \$0.00 (0.00%) |
| 361. | Samsung GT-S5360T Galaxy Y            | 13 (0.02%) | 46.15%  | 6 (0.01%)  | 38.46% | 3.77 | 00:05:42 | 0.00% | 0 (0.00%) | \$0.00 (0.00%) |
| 362. | Samsung GT-S5660 Galaxy Gio           | 13 (0.02%) | 84.62%  | 11 (0.03%) | 69.23% | 1.77 | 00:00:26 | 0.00% | 0 (0.00%) | \$0.00 (0.00%) |
| 363. | Samsung GT-S7392 Galaxy Trend         | 13 (0.02%) | 46.15%  | 6 (0.01%)  | 92.31% | 1.08 | 00:00:22 | 0.00% | 0 (0.00%) | \$0.00 (0.00%) |
| 364. | Samsung SCH-I337 Galaxy S IV          | 13 (0.02%) | 100.00% | 13 (0.03%) | 92.31% | 1.15 | 00:00:05 | 0.00% | 0 (0.00%) | \$0.00 (0.00%) |
| 365. | Samsung SGH-I317M Galaxy Note II      | 13 (0.02%) | 92.31%  | 12 (0.03%) | 84.62% | 1.38 | 00:00:19 | 0.00% | 0 (0.00%) | \$0.00 (0.00%) |
| 366. | Samsung SGH-i717 Galaxy Note          | 13 (0.02%) | 92.31%  | 12 (0.03%) | 76.92% | 1.54 | 00:00:21 | 0.00% | 0 (0.00%) | \$0.00 (0.00%) |
| 367. | Sony C5302 Xperia SP                  | 13 (0.02%) | 38.46%  | 5 (0.01%)  | 46.15% | 2.85 | 00:03:53 | 0.00% | 0 (0.00%) | \$0.00 (0.00%) |
| 368. | SonyEricsson E10a Xperia X10 Mini pro | 13 (0.02%) | 69.23%  | 9 (0.02%)  | 23.08% | 6.00 | 00:10:12 | 0.00% | 0 (0.00%) | \$0.00 (0.00%) |
| 369. | SonyEricsson MK16 Xperia Pro          | 13 (0.02%) | 69.23%  | 9 (0.02%)  | 69.23% | 2.62 | 00:03:25 | 0.00% | 0 (0.00%) | \$0.00 (0.00%) |
| 370. | SonyEricsson ST27a Xperia Go          | 13 (0.02%) | 84.62%  | 11 (0.03%) | 53.85% | 5.38 | 00:06:40 | 0.00% | 0 (0.00%) | \$0.00 (0.00%) |
| 371. | ZTE V791                              | 13 (0.02%) | 100.00% | 13 (0.03%) | 84.62% | 1.38 | 00:00:30 | 0.00% | 0 (0.00%) | \$0.00 (0.00%) |
| 372. | Acer Iconia B1-710                    | 12 (0.02%) | 75.00%  | 9 (0.02%)  | 75.00% | 1.75 | 00:05:47 | 0.00% | 0 (0.00%) | \$0.00 (0.00%) |

|      |                                                        |            |         |            |         |      |          |       |           |                |
|------|--------------------------------------------------------|------------|---------|------------|---------|------|----------|-------|-----------|----------------|
| 373. | HTC<br>ADR6410LVW<br>4G Droid<br>Incredible 4G<br>LTE  | 12 (0.02%) | 50.00%  | 6 (0.01%)  | 50.00%  | 4.17 | 00:01:37 | 0.00% | 0 (0.00%) | \$0.00 (0.00%) |
| 374. | LG E460<br>Optimus L5 II                               | 12 (0.02%) | 91.67%  | 11 (0.03%) | 75.00%  | 1.83 | 00:00:51 | 0.00% | 0 (0.00%) | \$0.00 (0.00%) |
| 375. | LG F160K<br>Optimus LTE2                               | 12 (0.02%) | 50.00%  | 6 (0.01%)  | 50.00%  | 3.67 | 00:01:14 | 0.00% | 0 (0.00%) | \$0.00 (0.00%) |
| 376. | LG P708G<br>Optimus L7                                 | 12 (0.02%) | 83.33%  | 10 (0.02%) | 66.67%  | 4.08 | 00:01:56 | 0.00% | 0 (0.00%) | \$0.00 (0.00%) |
| 377. | Motorola MB886<br>Atrix HD                             | 12 (0.02%) | 66.67%  | 8 (0.02%)  | 83.33%  | 2.50 | 00:00:28 | 0.00% | 0 (0.00%) | \$0.00 (0.00%) |
| 378. | Motorola XT862<br>Droid 3                              | 12 (0.02%) | 75.00%  | 9 (0.02%)  | 66.67%  | 3.08 | 00:03:25 | 0.00% | 0 (0.00%) | \$0.00 (0.00%) |
| 379. | Mozilla Firefox<br>OS                                  | 12 (0.02%) | 100.00% | 12 (0.03%) | 41.67%  | 7.42 | 00:03:30 | 0.00% | 0 (0.00%) | \$0.00 (0.00%) |
| 380. | Nokia 5230<br>Nuron                                    | 12 (0.02%) | 91.67%  | 11 (0.03%) | 58.33%  | 1.92 | 00:00:35 | 0.00% | 0 (0.00%) | \$0.00 (0.00%) |
| 381. | Nokia Lumia<br>1020                                    | 12 (0.02%) | 75.00%  | 9 (0.02%)  | 66.67%  | 2.25 | 00:02:12 | 0.00% | 0 (0.00%) | \$0.00 (0.00%) |
| 382. | Orange Daytona                                         | 12 (0.02%) | 91.67%  | 11 (0.03%) | 66.67%  | 1.92 | 00:01:52 | 0.00% | 0 (0.00%) | \$0.00 (0.00%) |
| 383. | Samsung GT-<br>C3262                                   | 12 (0.02%) | 91.67%  | 11 (0.03%) | 75.00%  | 1.42 | 00:00:45 | 0.00% | 0 (0.00%) | \$0.00 (0.00%) |
| 384. | Samsung GT-<br>I9200 Galaxy<br>Mega 6.3                | 12 (0.02%) | 83.33%  | 10 (0.02%) | 75.00%  | 1.92 | 00:00:54 | 0.00% | 0 (0.00%) | \$0.00 (0.00%) |
| 385. | Samsung GT-<br>P1010 Galaxy<br>Tab                     | 12 (0.02%) | 100.00% | 12 (0.03%) | 41.67%  | 7.08 | 00:08:20 | 0.00% | 0 (0.00%) | \$0.00 (0.00%) |
| 386. | Samsung GT-<br>P6210 Samsung<br>Galaxy Tab 7.0<br>Plus | 12 (0.02%) | 25.00%  | 3 (0.01%)  | 41.67%  | 3.33 | 00:03:36 | 0.00% | 0 (0.00%) | \$0.00 (0.00%) |
| 387. | Samsung GT-<br>P7100 Galaxy<br>Tab 10.1V               | 12 (0.02%) | 58.33%  | 7 (0.02%)  | 75.00%  | 2.17 | 00:01:16 | 0.00% | 0 (0.00%) | \$0.00 (0.00%) |
| 388. | Samsung GT-<br>S6810M Galaxy<br>Fame                   | 12 (0.02%) | 66.67%  | 8 (0.02%)  | 83.33%  | 4.33 | 00:03:01 | 0.00% | 0 (0.00%) | \$0.00 (0.00%) |
| 389. | Samsung GT-<br>S6812 Galaxy<br>Fame                    | 12 (0.02%) | 91.67%  | 11 (0.03%) | 41.67%  | 3.58 | 00:02:06 | 0.00% | 0 (0.00%) | \$0.00 (0.00%) |
| 390. | Samsung SGH-<br>I997 Infuse                            | 12 (0.02%) | 83.33%  | 10 (0.02%) | 58.33%  | 4.17 | 00:05:07 | 0.00% | 0 (0.00%) | \$0.00 (0.00%) |
| 391. | Samsung SHV-<br>E250S Galaxy<br>Note II                | 12 (0.02%) | 58.33%  | 7 (0.02%)  | 33.33%  | 5.25 | 00:08:40 | 0.00% | 0 (0.00%) | \$0.00 (0.00%) |
| 392. | Samsung SM-<br>N900V Galaxy<br>Note 3                  | 12 (0.02%) | 75.00%  | 9 (0.02%)  | 91.67%  | 1.08 | 00:00:02 | 0.00% | 0 (0.00%) | \$0.00 (0.00%) |
| 393. | Acer A210                                              | 11 (0.02%) | 81.82%  | 9 (0.02%)  | 100.00% | 1.00 | 00:00:00 | 0.00% | 0 (0.00%) | \$0.00 (0.00%) |
| 394. | Alcatel OT-<br>4007D One<br>Touch Pixi 4007D           | 11 (0.02%) | 100.00% | 11 (0.03%) | 45.45%  | 2.09 | 00:01:22 | 0.00% | 0 (0.00%) | \$0.00 (0.00%) |
| 395. | Alcatel OT-6030/<br>One Touch Idol                     | 11 (0.02%) | 90.91%  | 10 (0.02%) | 63.64%  | 2.09 | 00:05:36 | 0.00% | 0 (0.00%) | \$0.00 (0.00%) |
| 396. | Asus Fonepad 7                                         | 11 (0.02%) | 81.82%  | 9 (0.02%)  | 72.73%  | 1.36 | 00:00:32 | 0.00% | 0 (0.00%) | \$0.00 (0.00%) |
| 397. | HP Mesquite                                            | 11 (0.02%) | 81.82%  | 9 (0.02%)  | 72.73%  | 1.91 | 00:00:21 | 0.00% | 0 (0.00%) | \$0.00 (0.00%) |
| 398. | HTC One 801e<br>One                                    | 11 (0.02%) | 45.45%  | 5 (0.01%)  | 45.45%  | 3.91 | 00:01:46 | 0.00% | 0 (0.00%) | \$0.00 (0.00%) |
| 399. | Huawei C8651<br>Evolution II                           | 11 (0.02%) | 72.73%  | 8 (0.02%)  | 81.82%  | 1.36 | 00:00:37 | 0.00% | 0 (0.00%) | \$0.00 (0.00%) |

| ID   | Device Name                           | OS Version | Screen Size (inches) | RAM (GB)   | Storage (GB) | Weight (g) | Dimensions (mm) | Battery Capacity (mAh) | Charging Time (h:m) | Price (USD)    |
|------|---------------------------------------|------------|----------------------|------------|--------------|------------|-----------------|------------------------|---------------------|----------------|
| 400. | Huawei U8185 Ascend Y100              | 11 (0.02%) | 45.45%               | 5 (0.01%)  | 54.55%       | 2.09       | 00:01:01        | 0.00%                  | 0 (0.00%)           | \$0.00 (0.00%) |
| 401. | Huawei U8665 Fusion 2                 | 11 (0.02%) | 81.82%               | 9 (0.02%)  | 81.82%       | 2.09       | 00:00:47        | 0.00%                  | 0 (0.00%)           | \$0.00 (0.00%) |
| 402. | Huawei U8825D Ascend G330D            | 11 (0.02%) | 100.00%              | 11 (0.03%) | 72.73%       | 1.36       | 00:00:20        | 0.00%                  | 0 (0.00%)           | \$0.00 (0.00%) |
| 403. | Lenovo A2109A IdeaTab A2109A          | 11 (0.02%) | 72.73%               | 8 (0.02%)  | 36.36%       | 5.18       | 00:07:37        | 0.00%                  | 0 (0.00%)           | \$0.00 (0.00%) |
| 404. | Lifetab P9514                         | 11 (0.02%) | 54.55%               | 6 (0.01%)  | 100.00%      | 1.00       | 00:00:00        | 0.00%                  | 0 (0.00%)           | \$0.00 (0.00%) |
| 405. | Motorola MB860 Atrix                  | 11 (0.02%) | 63.64%               | 7 (0.02%)  | 45.45%       | 2.91       | 00:01:06        | 0.00%                  | 0 (0.00%)           | \$0.00 (0.00%) |
| 406. | Motorola MZ601 Xoom                   | 11 (0.02%) | 90.91%               | 10 (0.02%) | 72.73%       | 1.64       | 00:00:28        | 0.00%                  | 0 (0.00%)           | \$0.00 (0.00%) |
| 407. | Motorola Xoom                         | 11 (0.02%) | 100.00%              | 11 (0.03%) | 63.64%       | 3.09       | 00:00:58        | 0.00%                  | 0 (0.00%)           | \$0.00 (0.00%) |
| 408. | Motorola XT320 Defy Mini              | 11 (0.02%) | 72.73%               | 8 (0.02%)  | 72.73%       | 1.27       | 00:00:31        | 0.00%                  | 0 (0.00%)           | \$0.00 (0.00%) |
| 409. | Nokia E63                             | 11 (0.02%) | 100.00%              | 11 (0.03%) | 54.55%       | 2.18       | 00:02:47        | 0.00%                  | 0 (0.00%)           | \$0.00 (0.00%) |
| 410. | Nokia X3-02                           | 11 (0.02%) | 100.00%              | 11 (0.03%) | 63.64%       | 4.00       | 00:03:57        | 0.00%                  | 0 (0.00%)           | \$0.00 (0.00%) |
| 411. | Sagem my721X                          | 11 (0.02%) | 100.00%              | 11 (0.03%) | 63.64%       | 1.64       | 00:00:54        | 0.00%                  | 0 (0.00%)           | \$0.00 (0.00%) |
| 412. | Samsung GT-I9080 Galaxy Grand         | 11 (0.02%) | 63.64%               | 7 (0.02%)  | 54.55%       | 11.91      | 00:08:49        | 0.00%                  | 0 (0.00%)           | \$0.00 (0.00%) |
| 413. | Samsung GT-i5500 Galaxy Europa        | 11 (0.02%) | 63.64%               | 7 (0.02%)  | 54.55%       | 3.73       | 00:11:08        | 0.00%                  | 0 (0.00%)           | \$0.00 (0.00%) |
| 414. | Samsung GT-S5282 Galaxy Star          | 11 (0.02%) | 90.91%               | 10 (0.02%) | 72.73%       | 1.73       | 00:00:48        | 0.00%                  | 0 (0.00%)           | \$0.00 (0.00%) |
| 415. | Samsung GT-S5367 Samsung Galaxy Y TV  | 11 (0.02%) | 90.91%               | 10 (0.02%) | 45.45%       | 2.91       | 00:01:04        | 0.00%                  | 0 (0.00%)           | \$0.00 (0.00%) |
| 416. | Samsung GT-S7582 Galaxy S Duos 2      | 11 (0.02%) | 54.55%               | 6 (0.01%)  | 72.73%       | 1.82       | 00:00:24        | 0.00%                  | 0 (0.00%)           | \$0.00 (0.00%) |
| 417. | Samsung SCH-R740C Galaxy Discover     | 11 (0.02%) | 63.64%               | 7 (0.02%)  | 63.64%       | 1.45       | 00:01:25        | 0.00%                  | 0 (0.00%)           | \$0.00 (0.00%) |
| 418. | Samsung SGH-i677 Focus Flash          | 11 (0.02%) | 45.45%               | 5 (0.01%)  | 18.18%       | 3.27       | 00:02:58        | 0.00%                  | 0 (0.00%)           | \$0.00 (0.00%) |
| 419. | Samsung SM-G730A Galaxy S III Mini    | 11 (0.02%) | 27.27%               | 3 (0.01%)  | 36.36%       | 2.27       | 00:01:13        | 0.00%                  | 0 (0.00%)           | \$0.00 (0.00%) |
| 420. | Sony SGP311 Xperia Tablet Z           | 11 (0.02%) | 90.91%               | 10 (0.02%) | 45.45%       | 2.82       | 00:00:41        | 0.00%                  | 0 (0.00%)           | \$0.00 (0.00%) |
| 421. | SonyEricsson ST18i Urushi             | 11 (0.02%) | 100.00%              | 11 (0.03%) | 100.00%      | 1.00       | 00:00:00        | 0.00%                  | 0 (0.00%)           | \$0.00 (0.00%) |
| 422. | Acer A501 Picasso                     | 10 (0.02%) | 40.00%               | 4 (0.01%)  | 20.00%       | 18.30      | 00:15:33        | 0.00%                  | 0 (0.00%)           | \$0.00 (0.00%) |
| 423. | Amazon KFSOW Kindle Fire HD 7 3rd Gen | 10 (0.02%) | 70.00%               | 7 (0.02%)  | 80.00%       | 1.20       | 00:00:01        | 0.00%                  | 0 (0.00%)           | \$0.00 (0.00%) |
| 424. | BlackBerry KBD                        | 10 (0.02%) | 60.00%               | 6 (0.01%)  | 70.00%       | 1.30       | 00:00:06        | 0.00%                  | 0 (0.00%)           | \$0.00 (0.00%) |
| 425. | Huawei MT1-U0E Ascend Mate            | 10 (0.02%) | 60.00%               | 6 (0.01%)  | 50.00%       | 7.20       | 00:06:46        | 0.00%                  | 0 (0.00%)           | \$0.00 (0.00%) |
| 426. | Huawei T8951 Ascend G510              | 10 (0.02%) | 90.00%               | 9 (0.02%)  | 70.00%       | 3.50       | 00:02:40        | 0.00%                  | 0 (0.00%)           | \$0.00 (0.00%) |
| 427. | Lenovo A2107A-F IdeaTab A2107A-F      | 10 (0.02%) | 40.00%               | 4 (0.01%)  | 50.00%       | 47.70      | 00:23:54        | 0.00%                  | 0 (0.00%)           | \$0.00 (0.00%) |
| 428. | LG D805 G2                            | 10 (0.02%) | 80.00%               | 8 (0.02%)  | 50.00%       | 3.40       | 00:01:43        | 0.00%                  | 0 (0.00%)           | \$0.00 (0.00%) |



| Rank | Model                              | OS      | RAM        | Storage | Processor  | Camera  | Battery | Display  | Price | Availability |                |
|------|------------------------------------|---------|------------|---------|------------|---------|---------|----------|-------|--------------|----------------|
| 429. | LG E455 Optimus L5 II Dual         | Android | 10 (0.02%) | 60.00%  | 6 (0.01%)  | 80.00%  | 8.40    | 00:05:11 | 0.00% | 0 (0.00%)    | \$0.00 (0.00%) |
| 430. | LG E610v Optimus L5                | Android | 10 (0.02%) | 80.00%  | 8 (0.02%)  | 100.00% | 1.00    | 00:00:00 | 0.00% | 0 (0.00%)    | \$0.00 (0.00%) |
| 431. | LG E975 Optimus G                  | Android | 10 (0.02%) | 80.00%  | 8 (0.02%)  | 70.00%  | 2.00    | 00:00:28 | 0.00% | 0 (0.00%)    | \$0.00 (0.00%) |
| 432. | LG VS840 4G Lucid                  | Android | 10 (0.02%) | 60.00%  | 6 (0.01%)  | 50.00%  | 3.20    | 00:03:55 | 0.00% | 0 (0.00%)    | \$0.00 (0.00%) |
| 433. | Motorola MB525 DEFY                | Android | 10 (0.02%) | 80.00%  | 8 (0.02%)  | 90.00%  | 1.20    | 00:00:06 | 0.00% | 0 (0.00%)    | \$0.00 (0.00%) |
| 434. | Nokia 2700 classic                 | Symbian | 10 (0.02%) | 90.00%  | 9 (0.02%)  | 90.00%  | 1.10    | 00:00:12 | 0.00% | 0 (0.00%)    | \$0.00 (0.00%) |
| 435. | Nokia 309 Asha 309                 | Asha    | 10 (0.02%) | 90.00%  | 9 (0.02%)  | 90.00%  | 1.10    | 00:00:03 | 0.00% | 0 (0.00%)    | \$0.00 (0.00%) |
| 436. | Nokia E72                          | Symbian | 10 (0.02%) | 100.00% | 10 (0.02%) | 50.00%  | 1.60    | 00:00:51 | 0.00% | 0 (0.00%)    | \$0.00 (0.00%) |
| 437. | Samsung GT-B5330 Galaxy Chat       | Android | 10 (0.02%) | 80.00%  | 8 (0.02%)  | 90.00%  | 1.30    | 00:00:35 | 0.00% | 0 (0.00%)    | \$0.00 (0.00%) |
| 438. | Samsung GT-C3312 Rex 60 Duos       | Android | 10 (0.02%) | 100.00% | 10 (0.02%) | 100.00% | 1.00    | 00:00:00 | 0.00% | 0 (0.00%)    | \$0.00 (0.00%) |
| 439. | Samsung GT-I8730 Galaxy Express    | Android | 10 (0.02%) | 90.00%  | 9 (0.02%)  | 60.00%  | 1.60    | 00:00:23 | 0.00% | 0 (0.00%)    | \$0.00 (0.00%) |
| 440. | Samsung GT-I8750 ATIV Odyssey      | Android | 10 (0.02%) | 70.00%  | 7 (0.02%)  | 50.00%  | 3.50    | 00:01:27 | 0.00% | 0 (0.00%)    | \$0.00 (0.00%) |
| 441. | Samsung GT-I9295 Galaxy S4 Active  | Android | 10 (0.02%) | 100.00% | 10 (0.02%) | 80.00%  | 2.40    | 00:00:40 | 0.00% | 0 (0.00%)    | \$0.00 (0.00%) |
| 442. | Samsung GT-I9506 Galaxy S IV       | Android | 10 (0.02%) | 90.00%  | 9 (0.02%)  | 70.00%  | 2.40    | 00:00:27 | 0.00% | 0 (0.00%)    | \$0.00 (0.00%) |
| 443. | Samsung SCH-I200 Galaxy Stellar 4G | Android | 10 (0.02%) | 100.00% | 10 (0.02%) | 90.00%  | 1.10    | 00:00:16 | 0.00% | 0 (0.00%)    | \$0.00 (0.00%) |
| 444. | Samsung SGH-I747 Galaxy S III      | Android | 10 (0.02%) | 100.00% | 10 (0.02%) | 80.00%  | 1.30    | 00:00:20 | 0.00% | 0 (0.00%)    | \$0.00 (0.00%) |
| 445. | Samsung SPH-M830 Galaxy Rush       | Android | 10 (0.02%) | 80.00%  | 8 (0.02%)  | 30.00%  | 4.20    | 00:03:02 | 0.00% | 0 (0.00%)    | \$0.00 (0.00%) |
| 446. | Sony C2305 Xperia C                | Android | 10 (0.02%) | 90.00%  | 9 (0.02%)  | 80.00%  | 3.10    | 00:01:59 | 0.00% | 0 (0.00%)    | \$0.00 (0.00%) |
| 447. | Sony SGP321 Xperia Tablet Z LTE    | Android | 10 (0.02%) | 80.00%  | 8 (0.02%)  | 30.00%  | 6.20    | 00:06:15 | 0.00% | 0 (0.00%)    | \$0.00 (0.00%) |
| 448. | SonyEricsson SK17a Xperia Mini Pro | Android | 10 (0.02%) | 90.00%  | 9 (0.02%)  | 50.00%  | 3.10    | 00:02:31 | 0.00% | 0 (0.00%)    | \$0.00 (0.00%) |
| 449. | T-Mobile myTouch4G                 | Android | 10 (0.02%) | 70.00%  | 7 (0.02%)  | 80.00%  | 5.70    | 00:17:22 | 0.00% | 0 (0.00%)    | \$0.00 (0.00%) |
| 450. | Asus A68 PadFone 2                 | Android | 9 (0.01%)  | 88.89%  | 8 (0.02%)  | 66.67%  | 3.78    | 00:00:47 | 0.00% | 0 (0.00%)    | \$0.00 (0.00%) |
| 451. | DoCoMo SO-03E Xperia acro HD       | Android | 9 (0.01%)  | 22.22%  | 2 (0.00%)  | 22.22%  | 8.11    | 00:04:54 | 0.00% | 0 (0.00%)    | \$0.00 (0.00%) |
| 452. | HTC One mini                       | Android | 9 (0.01%)  | 88.89%  | 8 (0.02%)  | 88.89%  | 1.11    | 00:00:05 | 0.00% | 0 (0.00%)    | \$0.00 (0.00%) |
| 453. | Lenovo A3000-F IdeaTab A3000-F     | Android | 9 (0.01%)  | 22.22%  | 2 (0.00%)  | 66.67%  | 1.89    | 00:00:58 | 0.00% | 0 (0.00%)    | \$0.00 (0.00%) |
| 454. | LG E410g Optimus L1X               | Android | 9 (0.01%)  | 100.00% | 9 (0.02%)  | 88.89%  | 1.11    | 00:00:04 | 0.00% | 0 (0.00%)    | \$0.00 (0.00%) |
| 455. | LG E430 Optimus L3 II              | Android | 9 (0.01%)  | 88.89%  | 8 (0.02%)  | 77.78%  | 2.00    | 00:00:31 | 0.00% | 0 (0.00%)    | \$0.00 (0.00%) |

|      |                                        |           |         |           |         |      |          |       |           |                |
|------|----------------------------------------|-----------|---------|-----------|---------|------|----------|-------|-----------|----------------|
| 456. | LG V500 G Pad 8.3                      | 9 (0.01%) | 44.44%  | 4 (0.01%) | 77.78%  | 4.33 | 00:01:22 | 0.00% | 0 (0.00%) | \$0.00 (0.00%) |
| 457. | Samsung GT-I8160L Galaxy Ace 2         | 9 (0.01%) | 100.00% | 9 (0.02%) | 88.89%  | 1.11 | 00:00:01 | 0.00% | 0 (0.00%) | \$0.00 (0.00%) |
| 458. | Samsung GT-S6010 Galaxy Music          | 9 (0.01%) | 88.89%  | 8 (0.02%) | 66.67%  | 2.11 | 00:01:06 | 0.00% | 0 (0.00%) | \$0.00 (0.00%) |
| 459. | Samsung SCH-S738C Galaxy Centura       | 9 (0.01%) | 88.89%  | 8 (0.02%) | 88.89%  | 1.11 | 00:01:22 | 0.00% | 0 (0.00%) | \$0.00 (0.00%) |
| 460. | Samsung SM-T110 Galaxy Tab 3 Lite      | 9 (0.01%) | 33.33%  | 3 (0.01%) | 44.44%  | 6.44 | 00:06:04 | 0.00% | 0 (0.00%) | \$0.00 (0.00%) |
| 461. | Sony C6506 Xperia ZL                   | 9 (0.01%) | 66.67%  | 6 (0.01%) | 77.78%  | 1.78 | 00:00:32 | 0.00% | 0 (0.00%) | \$0.00 (0.00%) |
| 462. | Sony ST26a Xperia J                    | 9 (0.01%) | 100.00% | 9 (0.02%) | 100.00% | 1.00 | 00:00:00 | 0.00% | 0 (0.00%) | \$0.00 (0.00%) |
| 463. | SonyEricsson MT27i Xperia Sola         | 9 (0.01%) | 100.00% | 9 (0.02%) | 55.56%  | 3.22 | 00:02:17 | 0.00% | 0 (0.00%) | \$0.00 (0.00%) |
| 464. | Vodafone 875 Smart Mini                | 9 (0.01%) | 66.67%  | 6 (0.01%) | 33.33%  | 2.44 | 00:01:33 | 0.00% | 0 (0.00%) | \$0.00 (0.00%) |
| 465. | ALCATEL ONE TOUCH 6012X                | 8 (0.01%) | 62.50%  | 5 (0.01%) | 50.00%  | 2.38 | 00:00:50 | 0.00% | 0 (0.00%) | \$0.00 (0.00%) |
| 466. | Alcatel OT-918A One Touch 918A         | 8 (0.01%) | 75.00%  | 6 (0.01%) | 37.50%  | 3.50 | 00:03:38 | 0.00% | 0 (0.00%) | \$0.00 (0.00%) |
| 467. | Asus ME302C MeMO Pad ME302C            | 8 (0.01%) | 62.50%  | 5 (0.01%) | 87.50%  | 2.50 | 00:00:10 | 0.00% | 0 (0.00%) | \$0.00 (0.00%) |
| 468. | Barnes and Noble BNTV250A NOOK Tablet  | 8 (0.01%) | 100.00% | 8 (0.02%) | 50.00%  | 5.00 | 00:03:46 | 0.00% | 0 (0.00%) | \$0.00 (0.00%) |
| 469. | DoCoMo N-02E One Piece Limited Edition | 8 (0.01%) | 12.50%  | 1 (0.00%) | 0.00%   | 9.38 | 00:13:24 | 0.00% | 0 (0.00%) | \$0.00 (0.00%) |
| 470. | HTC A810e ChaCha                       | 8 (0.01%) | 75.00%  | 6 (0.01%) | 50.00%  | 6.00 | 00:05:16 | 0.00% | 0 (0.00%) | \$0.00 (0.00%) |
| 471. | HTC Amaze 4G                           | 8 (0.01%) | 37.50%  | 3 (0.01%) | 62.50%  | 2.38 | 00:01:48 | 0.00% | 0 (0.00%) | \$0.00 (0.00%) |
| 472. | HTC X515C EVC 3D                       | 8 (0.01%) | 62.50%  | 5 (0.01%) | 75.00%  | 1.62 | 00:00:18 | 0.00% | 0 (0.00%) | \$0.00 (0.00%) |
| 473. | Huawei Y210-0100 Ascend Y210           | 8 (0.01%) | 75.00%  | 6 (0.01%) | 75.00%  | 1.75 | 00:00:55 | 0.00% | 0 (0.00%) | \$0.00 (0.00%) |
| 474. | Kyocera C5170 Hydro C5170              | 8 (0.01%) | 100.00% | 8 (0.02%) | 62.50%  | 2.12 | 00:00:26 | 0.00% | 0 (0.00%) | \$0.00 (0.00%) |
| 475. | LG E405F Optimus L3                    | 8 (0.01%) | 62.50%  | 5 (0.01%) | 25.00%  | 5.75 | 00:11:07 | 0.00% | 0 (0.00%) | \$0.00 (0.00%) |
| 476. | LG E615 Optimus L5 Dual                | 8 (0.01%) | 62.50%  | 5 (0.01%) | 37.50%  | 4.88 | 00:04:34 | 0.00% | 0 (0.00%) | \$0.00 (0.00%) |
| 477. | LG LG-C195                             | 8 (0.01%) | 75.00%  | 6 (0.01%) | 62.50%  | 1.50 | 00:00:59 | 0.00% | 0 (0.00%) | \$0.00 (0.00%) |
| 478. | LG LG-T375                             | 8 (0.01%) | 100.00% | 8 (0.02%) | 87.50%  | 1.38 | 00:00:14 | 0.00% | 0 (0.00%) | \$0.00 (0.00%) |
| 479. | LG LS980 G2                            | 8 (0.01%) | 100.00% | 8 (0.02%) | 75.00%  | 2.75 | 00:01:07 | 0.00% | 0 (0.00%) | \$0.00 (0.00%) |
| 480. | LG P700 Optimus L7                     | 8 (0.01%) | 100.00% | 8 (0.02%) | 87.50%  | 1.12 | 00:00:07 | 0.00% | 0 (0.00%) | \$0.00 (0.00%) |
| 481. | LG P970h Optimus Black                 | 8 (0.01%) | 62.50%  | 5 (0.01%) | 62.50%  | 2.12 | 00:01:10 | 0.00% | 0 (0.00%) | \$0.00 (0.00%) |
| 482. | LG VS920 4G Revolution 2               | 8 (0.01%) | 37.50%  | 3 (0.01%) | 50.00%  | 2.88 | 00:00:34 | 0.00% | 0 (0.00%) | \$0.00 (0.00%) |
| 483. | Nokia 310 Asha 310                     | 8 (0.01%) | 75.00%  | 6 (0.01%) | 87.50%  | 1.25 | 00:00:11 | 0.00% | 0 (0.00%) | \$0.00 (0.00%) |

|      |                                        |           |         |           |         |      |          |       |           |                |
|------|----------------------------------------|-----------|---------|-----------|---------|------|----------|-------|-----------|----------------|
| 484. | Nokia Asha 210.2 Asha 210              | 8 (0.01%) | 100.00% | 8 (0.02%) | 37.50%  | 3.62 | 00:01:59 | 0.00% | 0 (0.00%) | \$0.00 (0.00%) |
| 485. | Nokia C2-06                            | 8 (0.01%) | 100.00% | 8 (0.02%) | 75.00%  | 1.50 | 00:00:16 | 0.00% | 0 (0.00%) | \$0.00 (0.00%) |
| 486. | Nokia C5-03 C5                         | 8 (0.01%) | 100.00% | 8 (0.02%) | 100.00% | 1.00 | 00:00:00 | 0.00% | 0 (0.00%) | \$0.00 (0.00%) |
| 487. | Nokia N900                             | 8 (0.01%) | 87.50%  | 7 (0.02%) | 87.50%  | 3.00 | 00:02:48 | 0.00% | 0 (0.00%) | \$0.00 (0.00%) |
| 488. | Pantech ADR8995 4G Breakout            | 8 (0.01%) | 100.00% | 8 (0.02%) | 87.50%  | 1.50 | 00:00:06 | 0.00% | 0 (0.00%) | \$0.00 (0.00%) |
| 489. | Pantech IM-A850K Vega R3               | 8 (0.01%) | 50.00%  | 4 (0.01%) | 87.50%  | 1.50 | 00:00:14 | 0.00% | 0 (0.00%) | \$0.00 (0.00%) |
| 490. | RIM PlayBook                           | 8 (0.01%) | 50.00%  | 4 (0.01%) | 62.50%  | 8.88 | 00:04:47 | 0.00% | 0 (0.00%) | \$0.00 (0.00%) |
| 491. | Samsung GT-P5220 Galaxy Tab 3 10.1 LTE | 8 (0.01%) | 100.00% | 8 (0.02%) | 62.50%  | 2.88 | 00:00:39 | 0.00% | 0 (0.00%) | \$0.00 (0.00%) |
| 492. | Samsung GT-S5253                       | 8 (0.01%) | 100.00% | 8 (0.02%) | 50.00%  | 1.88 | 00:03:07 | 0.00% | 0 (0.00%) | \$0.00 (0.00%) |
| 493. | Samsung GT-S5690 Xcover                | 8 (0.01%) | 75.00%  | 6 (0.01%) | 75.00%  | 2.75 | 00:01:32 | 0.00% | 0 (0.00%) | \$0.00 (0.00%) |
| 494. | Samsung GT-S5690L Xcover               | 8 (0.01%) | 50.00%  | 4 (0.01%) | 0.00%   | 5.75 | 00:11:13 | 0.00% | 0 (0.00%) | \$0.00 (0.00%) |
| 495. | Samsung GT-S6313T                      | 8 (0.01%) | 62.50%  | 5 (0.01%) | 37.50%  | 2.00 | 00:01:05 | 0.00% | 0 (0.00%) | \$0.00 (0.00%) |
| 496. | Samsung GT-S6500L Galaxy Mini 2        | 8 (0.01%) | 62.50%  | 5 (0.01%) | 50.00%  | 1.75 | 00:00:15 | 0.00% | 0 (0.00%) | \$0.00 (0.00%) |
| 497. | Samsung GT-S7560 Galaxy Ace II x       | 8 (0.01%) | 100.00% | 8 (0.02%) | 37.50%  | 2.12 | 00:00:54 | 0.00% | 0 (0.00%) | \$0.00 (0.00%) |
| 498. | Samsung SGH-I547 Galaxy Rugby Pro      | 8 (0.01%) | 100.00% | 8 (0.02%) | 62.50%  | 2.38 | 00:01:03 | 0.00% | 0 (0.00%) | \$0.00 (0.00%) |
| 499. | Samsung SGH-I577 Exhilarate            | 8 (0.01%) | 87.50%  | 7 (0.02%) | 87.50%  | 1.12 | 00:00:02 | 0.00% | 0 (0.00%) | \$0.00 (0.00%) |
| 500. | Samsung SHV-E250K Galaxy Note II       | 8 (0.01%) | 100.00% | 8 (0.02%) | 62.50%  | 2.00 | 00:00:38 | 0.00% | 0 (0.00%) | \$0.00 (0.00%) |
| 501. | Samsung SPH-D700 Epic 4G               | 8 (0.01%) | 87.50%  | 7 (0.02%) | 75.00%  | 1.38 | 00:00:09 | 0.00% | 0 (0.00%) | \$0.00 (0.00%) |
| 502. | Sony C1604 Xperia E Dual               | 8 (0.01%) | 75.00%  | 6 (0.01%) | 75.00%  | 2.88 | 00:05:29 | 0.00% | 0 (0.00%) | \$0.00 (0.00%) |
| 503. | SonyEricsson MT15i Xperia Neo          | 8 (0.01%) | 100.00% | 8 (0.02%) | 100.00% | 1.00 | 00:00:00 | 0.00% | 0 (0.00%) | \$0.00 (0.00%) |
| 504. | SonyEricsson SK17i Xperia Mini Pro     | 8 (0.01%) | 100.00% | 8 (0.02%) | 50.00%  | 1.88 | 00:01:52 | 0.00% | 0 (0.00%) | \$0.00 (0.00%) |
| 505. | SonyEricsson X10i Xperia X10           | 8 (0.01%) | 100.00% | 8 (0.02%) | 75.00%  | 3.00 | 00:05:29 | 0.00% | 0 (0.00%) | \$0.00 (0.00%) |
| 506. | TWM Fantastic T3                       | 8 (0.01%) | 25.00%  | 2 (0.00%) | 50.00%  | 1.75 | 00:02:01 | 0.00% | 0 (0.00%) | \$0.00 (0.00%) |
| 507. | Xiaomi MI-2                            | 8 (0.01%) | 75.00%  | 6 (0.01%) | 50.00%  | 2.75 | 00:01:00 | 0.00% | 0 (0.00%) | \$0.00 (0.00%) |
| 508. | Barnes and Noble BNTV250 NOOK Tablet   | 7 (0.01%) | 85.71%  | 6 (0.01%) | 57.14%  | 2.00 | 00:00:20 | 0.00% | 0 (0.00%) | \$0.00 (0.00%) |
| 509. | Google Nexus S                         | 7 (0.01%) | 71.43%  | 5 (0.01%) | 71.43%  | 1.71 | 00:02:24 | 0.00% | 0 (0.00%) | \$0.00 (0.00%) |
| 510. | HTC APC715CKT EVO Design 4G            | 7 (0.01%) | 100.00% | 7 (0.02%) | 85.71%  | 1.57 | 00:00:19 | 0.00% | 0 (0.00%) | \$0.00 (0.00%) |
| 511. | HTC HTC6435LVW Droid DNA               | 7 (0.01%) | 100.00% | 7 (0.02%) | 71.43%  | 1.71 | 00:01:05 | 0.00% | 0 (0.00%) | \$0.00 (0.00%) |

| Rank | Device                                  | OS            | RAM    | Storage | Processor | Price    | Release Date | OS Version | OS Update | OS Support |
|------|-----------------------------------------|---------------|--------|---------|-----------|----------|--------------|------------|-----------|------------|
| 512. | HTC ISW11HT HTC EVO WiMAX               | Android 2.2   | 512 MB | 32 GB   | 1 GHz     | \$199.99 | 2011-01-11   | 2.2.3      | 2.2.3     | 2011-01-11 |
| 513. | HTC One V                               | Android 2.2   | 512 MB | 32 GB   | 1 GHz     | \$199.99 | 2011-01-11   | 2.2.3      | 2.2.3     | 2011-01-11 |
| 514. | HTC S510e Desire S                      | Android 2.2   | 512 MB | 32 GB   | 1 GHz     | \$199.99 | 2011-01-11   | 2.2.3      | 2.2.3     | 2011-01-11 |
| 515. | HTC X315e Sensation XL with Beats Audio | Android 2.2   | 512 MB | 32 GB   | 1 GHz     | \$199.99 | 2011-01-11   | 2.2.3      | 2.2.3     | 2011-01-11 |
| 516. | Lenovo A1000-T IdeaTab A1000-T          | Android 2.2   | 512 MB | 32 GB   | 1 GHz     | \$199.99 | 2011-01-11   | 2.2.3      | 2.2.3     | 2011-01-11 |
| 517. | LG E425g Optimus L3 II                  | Android 2.2   | 512 MB | 32 GB   | 1 GHz     | \$199.99 | 2011-01-11   | 2.2.3      | 2.2.3     | 2011-01-11 |
| 518. | LG E430f Optimus L3 II                  | Android 2.2   | 512 MB | 32 GB   | 1 GHz     | \$199.99 | 2011-01-11   | 2.2.3      | 2.2.3     | 2011-01-11 |
| 519. | LG E440g Optimus L4 II                  | Android 2.2   | 512 MB | 32 GB   | 1 GHz     | \$199.99 | 2011-01-11   | 2.2.3      | 2.2.3     | 2011-01-11 |
| 520. | LG E980 Optimus G Pro                   | Android 2.2   | 512 MB | 32 GB   | 1 GHz     | \$199.99 | 2011-01-11   | 2.2.3      | 2.2.3     | 2011-01-11 |
| 521. | LG F240L Optimus G Pro                  | Android 2.2   | 512 MB | 32 GB   | 1 GHz     | \$199.99 | 2011-01-11   | 2.2.3      | 2.2.3     | 2011-01-11 |
| 522. | LG P705 Optimus L7                      | Android 2.2   | 512 MB | 32 GB   | 1 GHz     | \$199.99 | 2011-01-11   | 2.2.3      | 2.2.3     | 2011-01-11 |
| 523. | LogicPD Zoom2 Barnes & Noble Nook Color | Android 2.2   | 512 MB | 32 GB   | 1 GHz     | \$199.99 | 2011-01-11   | 2.2.3      | 2.2.3     | 2011-01-11 |
| 524. | Medion LIFETAB S9512                    | Android 2.2   | 512 MB | 32 GB   | 1 GHz     | \$199.99 | 2011-01-11   | 2.2.3      | 2.2.3     | 2011-01-11 |
| 525. | Micromax A110Q Canvas 2 Plus            | Android 2.2   | 512 MB | 32 GB   | 1 GHz     | \$199.99 | 2011-01-11   | 2.2.3      | 2.2.3     | 2011-01-11 |
| 526. | Motorola DroidX                         | Android 2.2   | 512 MB | 32 GB   | 1 GHz     | \$199.99 | 2011-01-11   | 2.2.3      | 2.2.3     | 2011-01-11 |
| 527. | Motorola MB632 Pro+                     | Android 2.2   | 512 MB | 32 GB   | 1 GHz     | \$199.99 | 2011-01-11   | 2.2.3      | 2.2.3     | 2011-01-11 |
| 528. | Motorola XT1030 Droid Mini              | Android 2.2   | 512 MB | 32 GB   | 1 GHz     | \$199.99 | 2011-01-11   | 2.2.3      | 2.2.3     | 2011-01-11 |
| 529. | Motorola XT1032 DVX                     | Android 2.2   | 512 MB | 32 GB   | 1 GHz     | \$199.99 | 2011-01-11   | 2.2.3      | 2.2.3     | 2011-01-11 |
| 530. | Motorola XT316 Dominoq                  | Android 2.2   | 512 MB | 32 GB   | 1 GHz     | \$199.99 | 2011-01-11   | 2.2.3      | 2.2.3     | 2011-01-11 |
| 531. | Motorola XT389 Motoluxe XT389           | Android 2.2   | 512 MB | 32 GB   | 1 GHz     | \$199.99 | 2011-01-11   | 2.2.3      | 2.2.3     | 2011-01-11 |
| 532. | Motorola XT621 Primus                   | Android 2.2   | 512 MB | 32 GB   | 1 GHz     | \$199.99 | 2011-01-11   | 2.2.3      | 2.2.3     | 2011-01-11 |
| 533. | Motorola XT626                          | Android 2.2   | 512 MB | 32 GB   | 1 GHz     | \$199.99 | 2011-01-11   | 2.2.3      | 2.2.3     | 2011-01-11 |
| 534. | Motorola XT890                          | Android 2.2   | 512 MB | 32 GB   | 1 GHz     | \$199.99 | 2011-01-11   | 2.2.3      | 2.2.3     | 2011-01-11 |
| 535. | Nokia 5530 XpressMusic                  | Symbian       | 512 MB | 32 GB   | 1 GHz     | \$199.99 | 2011-01-11   | 5.0        | 5.0       | 2011-01-11 |
| 536. | Nokia Asha 210.5 Asha 210               | Symbian       | 512 MB | 32 GB   | 1 GHz     | \$199.99 | 2011-01-11   | 5.0        | 5.0       | 2011-01-11 |
| 537. | Nokia C1-01                             | Symbian       | 512 MB | 32 GB   | 1 GHz     | \$199.99 | 2011-01-11   | 5.0        | 5.0       | 2011-01-11 |
| 538. | Nokia C2-05                             | Symbian       | 512 MB | 32 GB   | 1 GHz     | \$199.99 | 2011-01-11   | 5.0        | 5.0       | 2011-01-11 |
| 539. | Nokia C7-00 Astound                     | Symbian       | 512 MB | 32 GB   | 1 GHz     | \$199.99 | 2011-01-11   | 5.0        | 5.0       | 2011-01-11 |
| 540. | Nokia Lumia 521                         | Windows Phone | 512 MB | 32 GB   | 1 GHz     | \$199.99 | 2011-01-11   | 7.0        | 7.0       | 2011-01-11 |
| 541. | Nokia X2-00                             | Symbian       | 512 MB | 32 GB   | 1 GHz     | \$199.99 | 2011-01-11   | 5.0        | 5.0       | 2011-01-11 |
| 542. | QMobile A10 Noi A10                     | Android 2.2   | 512 MB | 32 GB   | 1 GHz     | \$199.99 | 2011-01-11   | 2.2.3      | 2.2.3     | 2011-01-11 |
| 543. | Samsung GT-...                          | Android 2.2   | 512 MB | 32 GB   | 1 GHz     | \$199.99 | 2011-01-11   | 2.2.3      | 2.2.3     | 2011-01-11 |

|      |                                        |           |         |           |         |      |          |       |           |                |
|------|----------------------------------------|-----------|---------|-----------|---------|------|----------|-------|-----------|----------------|
| 543. | Samsung GT-C3312                       | 7 (0.01%) | 85.71%  | 6 (0.01%) | 57.14%  | 3.14 | 00:03:44 | 0.00% | 0 (0.00%) | \$0.00 (0.00%) |
| 544. | Samsung GT-E2250 Utica                 | 7 (0.01%) | 100.00% | 7 (0.02%) | 57.14%  | 1.86 | 00:00:43 | 0.00% | 0 (0.00%) | \$0.00 (0.00%) |
| 545. | Samsung GT-I8260 Galaxy Core           | 7 (0.01%) | 100.00% | 7 (0.02%) | 85.71%  | 1.57 | 00:00:12 | 0.00% | 0 (0.00%) | \$0.00 (0.00%) |
| 546. | Samsung GT-i8350 Omnia W               | 7 (0.01%) | 57.14%  | 4 (0.01%) | 85.71%  | 1.86 | 00:00:23 | 0.00% | 0 (0.00%) | \$0.00 (0.00%) |
| 547. | Samsung GT-I8550L Galaxy Grand Quattro | 7 (0.01%) | 57.14%  | 4 (0.01%) | 100.00% | 1.00 | 00:00:00 | 0.00% | 0 (0.00%) | \$0.00 (0.00%) |
| 548. | Samsung GT-I9105 Galaxy SII Plus       | 7 (0.01%) | 100.00% | 7 (0.02%) | 85.71%  | 1.14 | 00:00:02 | 0.00% | 0 (0.00%) | \$0.00 (0.00%) |
| 549. | Samsung GT-N8020 Galaxy Note 10.1 LTE  | 7 (0.01%) | 100.00% | 7 (0.02%) | 57.14%  | 5.14 | 00:03:29 | 0.00% | 0 (0.00%) | \$0.00 (0.00%) |
| 550. | Samsung GT-P6200L GALAXY Tab 7.0 Plus  | 7 (0.01%) | 85.71%  | 6 (0.01%) | 42.86%  | 4.14 | 00:01:58 | 0.00% | 0 (0.00%) | \$0.00 (0.00%) |
| 551. | Samsung GT-S3802 Rex 70 Duos           | 7 (0.01%) | 85.71%  | 6 (0.01%) | 100.00% | 1.00 | 00:00:00 | 0.00% | 0 (0.00%) | \$0.00 (0.00%) |
| 552. | Samsung GT-S7262 Galaxy Star S7262     | 7 (0.01%) | 100.00% | 7 (0.02%) | 85.71%  | 1.14 | 00:04:20 | 0.00% | 0 (0.00%) | \$0.00 (0.00%) |
| 553. | Samsung GT-S7580 Trend Plus            | 7 (0.01%) | 42.86%  | 3 (0.01%) | 57.14%  | 1.86 | 00:00:22 | 0.00% | 0 (0.00%) | \$0.00 (0.00%) |
| 554. | Samsung SGH-T769 Galaxy S Blaze 4G     | 7 (0.01%) | 85.71%  | 6 (0.01%) | 71.43%  | 2.71 | 00:00:44 | 0.00% | 0 (0.00%) | \$0.00 (0.00%) |
| 555. | Samsung SGH-T999L Galaxy SIII LTE      | 7 (0.01%) | 85.71%  | 6 (0.01%) | 71.43%  | 1.57 | 00:00:21 | 0.00% | 0 (0.00%) | \$0.00 (0.00%) |
| 556. | Samsung SHW-M440S Galaxy SIII          | 7 (0.01%) | 28.57%  | 2 (0.00%) | 14.29%  | 4.86 | 00:08:25 | 0.00% | 0 (0.00%) | \$0.00 (0.00%) |
| 557. | Sony C6502 Xperia ZL                   | 7 (0.01%) | 100.00% | 7 (0.02%) | 71.43%  | 1.57 | 00:01:05 | 0.00% | 0 (0.00%) | \$0.00 (0.00%) |
| 558. | Sony C6906 Xperia Z1                   | 7 (0.01%) | 71.43%  | 5 (0.01%) | 42.86%  | 6.43 | 00:03:57 | 0.00% | 0 (0.00%) | \$0.00 (0.00%) |
| 559. | SonyEricsson R800a Xperia PLAY         | 7 (0.01%) | 100.00% | 7 (0.02%) | 85.71%  | 1.43 | 00:00:40 | 0.00% | 0 (0.00%) | \$0.00 (0.00%) |
| 560. | Alcatel OT-5035/ One Touch X'Pop 5035A | 6 (0.01%) | 50.00%  | 3 (0.01%) | 50.00%  | 5.00 | 00:04:16 | 0.00% | 0 (0.00%) | \$0.00 (0.00%) |
| 561. | Asus ME302C MeMO Pad FHD 10            | 6 (0.01%) | 50.00%  | 3 (0.01%) | 83.33%  | 1.33 | 00:00:24 | 0.00% | 0 (0.00%) | \$0.00 (0.00%) |
| 562. | bq Aquarius 5                          | 6 (0.01%) | 100.00% | 6 (0.01%) | 83.33%  | 2.00 | 00:00:46 | 0.00% | 0 (0.00%) | \$0.00 (0.00%) |
| 563. | DoCoMo SC-05E Galaxy Note              | 6 (0.01%) | 66.67%  | 4 (0.01%) | 100.00% | 1.00 | 00:00:00 | 0.00% | 0 (0.00%) | \$0.00 (0.00%) |
| 564. | Ginovo MID                             | 6 (0.01%) | 83.33%  | 5 (0.01%) | 33.33%  | 3.50 | 00:02:35 | 0.00% | 0 (0.00%) | \$0.00 (0.00%) |
| 565. | HTC S510b Rhyme                        | 6 (0.01%) | 66.67%  | 4 (0.01%) | 16.67%  | 7.50 | 00:15:17 | 0.00% | 0 (0.00%) | \$0.00 (0.00%) |
| 566. | HTC X515 EVO 3D                        | 6 (0.01%) | 100.00% | 6 (0.01%) | 83.33%  | 1.33 | 00:00:04 | 0.00% | 0 (0.00%) | \$0.00 (0.00%) |
| 567. | LG L38C Optimus Dynamic                | 6 (0.01%) | 100.00% | 6 (0.01%) | 50.00%  | 2.83 | 00:00:49 | 0.00% | 0 (0.00%) | \$0.00 (0.00%) |
| 568. | LG T515 T515 Cookie Duo                | 6 (0.01%) | 100.00% | 6 (0.01%) | 66.67%  | 2.00 | 00:02:18 | 0.00% | 0 (0.00%) | \$0.00 (0.00%) |
| 569. | LG VS980 4G Optimus VS980              | 6 (0.01%) | 83.33%  | 5 (0.01%) | 83.33%  | 1.33 | 00:00:01 | 0.00% | 0 (0.00%) | \$0.00 (0.00%) |

|      | Optimus G2 4G                        |           |         |           |         |      |          |       |           |                |  |
|------|--------------------------------------|-----------|---------|-----------|---------|------|----------|-------|-----------|----------------|--|
| 570. | Medion LifeTab P9516                 | 6 (0.01%) | 100.00% | 6 (0.01%) | 66.67%  | 2.67 | 00:00:43 | 0.00% | 0 (0.00%) | \$0.00 (0.00%) |  |
| 571. | Motorola Droid X2                    | 6 (0.01%) | 100.00% | 6 (0.01%) | 83.33%  | 1.17 | 00:00:07 | 0.00% | 0 (0.00%) | \$0.00 (0.00%) |  |
| 572. | Nokia Asha 503                       | 6 (0.01%) | 100.00% | 6 (0.01%) | 50.00%  | 2.33 | 00:00:55 | 0.00% | 0 (0.00%) | \$0.00 (0.00%) |  |
| 573. | Nokia C5-00 5MF C5                   | 6 (0.01%) | 100.00% | 6 (0.01%) | 66.67%  | 1.33 | 00:01:07 | 0.00% | 0 (0.00%) | \$0.00 (0.00%) |  |
| 574. | Nokia C6-00                          | 6 (0.01%) | 100.00% | 6 (0.01%) | 50.00%  | 7.00 | 00:05:18 | 0.00% | 0 (0.00%) | \$0.00 (0.00%) |  |
| 575. | Nokia E71                            | 6 (0.01%) | 100.00% | 6 (0.01%) | 50.00%  | 2.17 | 00:02:58 | 0.00% | 0 (0.00%) | \$0.00 (0.00%) |  |
| 576. | Nokia Lumia 822                      | 6 (0.01%) | 83.33%  | 5 (0.01%) | 83.33%  | 2.67 | 00:00:23 | 0.00% | 0 (0.00%) | \$0.00 (0.00%) |  |
| 577. | Samsung GT-B5330L Galaxy Chat        | 6 (0.01%) | 66.67%  | 4 (0.01%) | 66.67%  | 1.50 | 00:04:28 | 0.00% | 0 (0.00%) | \$0.00 (0.00%) |  |
| 578. | Samsung GT-i5500 Galaxy 5            | 6 (0.01%) | 83.33%  | 5 (0.01%) | 50.00%  | 2.33 | 00:05:56 | 0.00% | 0 (0.00%) | \$0.00 (0.00%) |  |
| 579. | Samsung GT-N8005 Galaxy Note 10.1    | 6 (0.01%) | 50.00%  | 3 (0.01%) | 66.67%  | 1.67 | 00:00:26 | 0.00% | 0 (0.00%) | \$0.00 (0.00%) |  |
| 580. | Samsung GT-S3570 Ch@t                | 6 (0.01%) | 100.00% | 6 (0.01%) | 50.00%  | 1.50 | 00:00:37 | 0.00% | 0 (0.00%) | \$0.00 (0.00%) |  |
| 581. | Samsung GT-S5301B Galaxy Pocket Plus | 6 (0.01%) | 83.33%  | 5 (0.01%) | 66.67%  | 3.17 | 00:05:52 | 0.00% | 0 (0.00%) | \$0.00 (0.00%) |  |
| 582. | Samsung GT-S5312 Galaxy Pocket Neo   | 6 (0.01%) | 83.33%  | 5 (0.01%) | 83.33%  | 1.17 | 00:02:34 | 0.00% | 0 (0.00%) | \$0.00 (0.00%) |  |
| 583. | Samsung GT-S5830B Galaxy Ace         | 6 (0.01%) | 83.33%  | 5 (0.01%) | 33.33%  | 3.17 | 00:05:02 | 0.00% | 0 (0.00%) | \$0.00 (0.00%) |  |
| 584. | Samsung GT-S7270 Galaxy Ace 3        | 6 (0.01%) | 83.33%  | 5 (0.01%) | 50.00%  | 2.50 | 00:01:14 | 0.00% | 0 (0.00%) | \$0.00 (0.00%) |  |
| 585. | Samsung GT-S7275R Galaxy Ace 3       | 6 (0.01%) | 100.00% | 6 (0.01%) | 100.00% | 1.00 | 00:00:00 | 0.00% | 0 (0.00%) | \$0.00 (0.00%) |  |
| 586. | Samsung SCH-i405 Stratosphere        | 6 (0.01%) | 83.33%  | 5 (0.01%) | 83.33%  | 1.33 | 00:00:04 | 0.00% | 0 (0.00%) | \$0.00 (0.00%) |  |
| 587. | Samsung SCH-I500 Fascinate           | 6 (0.01%) | 50.00%  | 3 (0.01%) | 16.67%  | 4.00 | 00:03:03 | 0.00% | 0 (0.00%) | \$0.00 (0.00%) |  |
| 588. | Samsung SCH-I915 Galaxy Tab 2 10.1   | 6 (0.01%) | 100.00% | 6 (0.01%) | 66.67%  | 2.67 | 00:01:41 | 0.00% | 0 (0.00%) | \$0.00 (0.00%) |  |
| 589. | Samsung SCH-R830 Galaxy Axiom        | 6 (0.01%) | 83.33%  | 5 (0.01%) | 100.00% | 1.00 | 00:00:00 | 0.00% | 0 (0.00%) | \$0.00 (0.00%) |  |
| 590. | Samsung SGH-I497 Galaxy Tab 2 10.1   | 6 (0.01%) | 100.00% | 6 (0.01%) | 66.67%  | 1.83 | 00:00:18 | 0.00% | 0 (0.00%) | \$0.00 (0.00%) |  |
| 591. | Samsung SGH-I897 Galaxy S Captivate  | 6 (0.01%) | 100.00% | 6 (0.01%) | 83.33%  | 1.67 | 00:00:23 | 0.00% | 0 (0.00%) | \$0.00 (0.00%) |  |
| 592. | Samsung SGH-i917 Omnia 7             | 6 (0.01%) | 100.00% | 6 (0.01%) | 66.67%  | 2.00 | 00:00:25 | 0.00% | 0 (0.00%) | \$0.00 (0.00%) |  |
| 593. | Samsung SGH-T699 Galaxy S Relay 4G   | 6 (0.01%) | 33.33%  | 2 (0.00%) | 100.00% | 1.00 | 00:00:00 | 0.00% | 0 (0.00%) | \$0.00 (0.00%) |  |
| 594. | Samsung SHV-E160K Galaxy Note        | 6 (0.01%) | 100.00% | 6 (0.01%) | 50.00%  | 3.00 | 00:01:11 | 0.00% | 0 (0.00%) | \$0.00 (0.00%) |  |
| 595. | Samsung SHV-E250L Galaxy Note II LTE | 6 (0.01%) | 83.33%  | 5 (0.01%) | 50.00%  | 5.50 | 00:04:06 | 0.00% | 0 (0.00%) | \$0.00 (0.00%) |  |

| Rank | Model                              | OS            | RAM       | Storage | Processor | Camera  | Battery | OS Version | OS Update | Price     |                |
|------|------------------------------------|---------------|-----------|---------|-----------|---------|---------|------------|-----------|-----------|----------------|
| 596. | Samsung SM-G900V Galaxy S5         | Android       | 6 (0.01%) | 83.33%  | 5 (0.01%) | 83.33%  | 1.17    | 00:00:02   | 0.00%     | 0 (0.00%) | \$0.00 (0.00%) |
| 597. | Sony C1505 Xperia E                | Android       | 6 (0.01%) | 100.00% | 6 (0.01%) | 83.33%  | 1.17    | 00:00:02   | 0.00%     | 0 (0.00%) | \$0.00 (0.00%) |
| 598. | ZTE Skate                          | Android       | 6 (0.01%) | 33.33%  | 2 (0.00%) | 16.67%  | 9.33    | 00:07:49   | 0.00%     | 0 (0.00%) | \$0.00 (0.00%) |
| 599. | ZTE X501 Groove                    | Android       | 6 (0.01%) | 83.33%  | 5 (0.01%) | 66.67%  | 3.50    | 00:02:15   | 0.00%     | 0 (0.00%) | \$0.00 (0.00%) |
| 600. | Alcatel OT-5020D One Touch M'Pop   | Android       | 5 (0.01%) | 80.00%  | 4 (0.01%) | 100.00% | 1.00    | 00:00:00   | 0.00%     | 0 (0.00%) | \$0.00 (0.00%) |
| 601. | Archos 101 G9                      | Android       | 5 (0.01%) | 100.00% | 5 (0.01%) | 80.00%  | 1.20    | 00:00:04   | 0.00%     | 0 (0.00%) | \$0.00 (0.00%) |
| 602. | BlackBerry 9720                    | OS6           | 5 (0.01%) | 100.00% | 5 (0.01%) | 60.00%  | 2.60    | 00:06:38   | 0.00%     | 0 (0.00%) | \$0.00 (0.00%) |
| 603. | HTC 8S                             | Android       | 5 (0.01%) | 100.00% | 5 (0.01%) | 80.00%  | 1.20    | 00:00:22   | 0.00%     | 0 (0.00%) | \$0.00 (0.00%) |
| 604. | HTC Desire 500                     | Android       | 5 (0.01%) | 100.00% | 5 (0.01%) | 60.00%  | 3.40    | 00:01:22   | 0.00%     | 0 (0.00%) | \$0.00 (0.00%) |
| 605. | HTC HTL21 J Butterfly              | Android       | 5 (0.01%) | 100.00% | 5 (0.01%) | 100.00% | 1.00    | 00:00:00   | 0.00%     | 0 (0.00%) | \$0.00 (0.00%) |
| 606. | HTC PH39100 Vivid 4G               | Android       | 5 (0.01%) | 100.00% | 5 (0.01%) | 100.00% | 1.00    | 00:00:00   | 0.00%     | 0 (0.00%) | \$0.00 (0.00%) |
| 607. | HTC PI86100 Titan II               | Android       | 5 (0.01%) | 40.00%  | 2 (0.00%) | 60.00%  | 2.60    | 00:01:23   | 0.00%     | 0 (0.00%) | \$0.00 (0.00%) |
| 608. | HTC Windows Phone 8X               | Windows Phone | 5 (0.01%) | 100.00% | 5 (0.01%) | 100.00% | 1.00    | 00:00:00   | 0.00%     | 0 (0.00%) | \$0.00 (0.00%) |
| 609. | Huawei BM-SWU300 IDEOS             | Android       | 5 (0.01%) | 80.00%  | 4 (0.01%) | 100.00% | 1.00    | 00:00:00   | 0.00%     | 0 (0.00%) | \$0.00 (0.00%) |
| 610. | Huawei C8812 Ascend C8812          | Android       | 5 (0.01%) | 60.00%  | 3 (0.01%) | 60.00%  | 2.00    | 00:02:03   | 0.00%     | 0 (0.00%) | \$0.00 (0.00%) |
| 611. | KDDI ISW12K Urbano Progresso       | Android       | 5 (0.01%) | 20.00%  | 1 (0.00%) | 40.00%  | 3.40    | 00:01:17   | 0.00%     | 0 (0.00%) | \$0.00 (0.00%) |
| 612. | Lenovo A3000-H IdeaTab A3000-H     | Android       | 5 (0.01%) | 80.00%  | 4 (0.01%) | 80.00%  | 1.20    | 00:02:46   | 0.00%     | 0 (0.00%) | \$0.00 (0.00%) |
| 613. | Lenovo P700i                       | Android       | 5 (0.01%) | 60.00%  | 3 (0.01%) | 40.00%  | 7.40    | 00:15:41   | 0.00%     | 0 (0.00%) | \$0.00 (0.00%) |
| 614. | LG LS670 Optimus S                 | Android       | 5 (0.01%) | 60.00%  | 3 (0.01%) | 80.00%  | 5.80    | 00:02:57   | 0.00%     | 0 (0.00%) | \$0.00 (0.00%) |
| 615. | LG LS860 Mach LS860                | Android       | 5 (0.01%) | 60.00%  | 3 (0.01%) | 100.00% | 1.00    | 00:00:00   | 0.00%     | 0 (0.00%) | \$0.00 (0.00%) |
| 616. | LG MS769 Optimus L9                | Android       | 5 (0.01%) | 80.00%  | 4 (0.01%) | 100.00% | 1.00    | 00:00:00   | 0.00%     | 0 (0.00%) | \$0.00 (0.00%) |
| 617. | LG MS870 Spirit 4G                 | Android       | 5 (0.01%) | 100.00% | 5 (0.01%) | 80.00%  | 1.20    | 00:00:23   | 0.00%     | 0 (0.00%) | \$0.00 (0.00%) |
| 618. | LG P920 Optimus 3D                 | Android       | 5 (0.01%) | 100.00% | 5 (0.01%) | 100.00% | 1.00    | 00:00:00   | 0.00%     | 0 (0.00%) | \$0.00 (0.00%) |
| 619. | LG T395                            | Android       | 5 (0.01%) | 80.00%  | 4 (0.01%) | 40.00%  | 5.80    | 00:03:51   | 0.00%     | 0 (0.00%) | \$0.00 (0.00%) |
| 620. | Micromax A27                       | Android       | 5 (0.01%) | 100.00% | 5 (0.01%) | 60.00%  | 2.20    | 00:00:50   | 0.00%     | 0 (0.00%) | \$0.00 (0.00%) |
| 621. | Motorola XT1060 Moto X             | Android       | 5 (0.01%) | 100.00% | 5 (0.01%) | 60.00%  | 2.40    | 00:00:27   | 0.00%     | 0 (0.00%) | \$0.00 (0.00%) |
| 622. | Nokia 2690                         | Symbian       | 5 (0.01%) | 100.00% | 5 (0.01%) | 80.00%  | 1.20    | 00:00:03   | 0.00%     | 0 (0.00%) | \$0.00 (0.00%) |
| 623. | Nokia 5310 XpressMusic XpressMusic | Symbian       | 5 (0.01%) | 100.00% | 5 (0.01%) | 100.00% | 1.00    | 00:00:00   | 0.00%     | 0 (0.00%) | \$0.00 (0.00%) |
| 624. | Nokia 7230                         | Symbian       | 5 (0.01%) | 100.00% | 5 (0.01%) | 100.00% | 1.00    | 00:00:00   | 0.00%     | 0 (0.00%) | \$0.00 (0.00%) |
| 625. | Nokia Asha 500                     | Symbian       | 5 (0.01%) | 100.00% | 5 (0.01%) | 60.00%  | 7.00    | 00:05:29   | 0.00%     | 0 (0.00%) | \$0.00 (0.00%) |
| 626. | Nokia E71-2                        | Symbian       | 5 (0.01%) | 100.00% | 5 (0.01%) | 20.00%  | 7.00    | 00:08:35   | 0.00%     | 0 (0.00%) | \$0.00 (0.00%) |
| 627. | Nokia Lumia 920T                   | Windows Phone | 5 (0.01%) | 60.00%  | 3 (0.01%) | 40.00%  | 4.40    | 00:06:59   | 0.00%     | 0 (0.00%) | \$0.00 (0.00%) |
| 628. | Nokia RM 800                       | Symbian       | 5 (0.01%) | 100.00% | 5 (0.01%) | 100.00% | 1.00    | 00:00:00   | 0.00%     | 0 (0.00%) | \$0.00 (0.00%) |

|      |                                     |           |         |           |         |      |          |       |           |                |
|------|-------------------------------------|-----------|---------|-----------|---------|------|----------|-------|-----------|----------------|
| 628. | Nokia RM-899 Asha 501s              | 5 (0.01%) | 80.00%  | 4 (0.01%) | 80.00%  | 1.60 | 00:00:14 | 0.00% | 0 (0.00%) | \$0.00 (0.00%) |
| 629. | Nokia X6-00                         | 5 (0.01%) | 100.00% | 5 (0.01%) | 80.00%  | 1.20 | 00:00:27 | 0.00% | 0 (0.00%) | \$0.00 (0.00%) |
| 630. | Opera Mini 2                        | 5 (0.01%) | 100.00% | 5 (0.01%) | 80.00%  | 1.20 | 00:02:18 | 0.00% | 0 (0.00%) | \$0.00 (0.00%) |
| 631. | Pantech P9070 Burst                 | 5 (0.01%) | 100.00% | 5 (0.01%) | 40.00%  | 2.40 | 00:00:24 | 0.00% | 0 (0.00%) | \$0.00 (0.00%) |
| 632. | Pegatron Chagall                    | 5 (0.01%) | 100.00% | 5 (0.01%) | 80.00%  | 1.40 | 00:00:22 | 0.00% | 0 (0.00%) | \$0.00 (0.00%) |
| 633. | QMobile A2 Noir                     | 5 (0.01%) | 100.00% | 5 (0.01%) | 80.00%  | 2.60 | 00:00:55 | 0.00% | 0 (0.00%) | \$0.00 (0.00%) |
| 634. | Samsung GT-B5512                    | 5 (0.01%) | 40.00%  | 2 (0.00%) | 0.00%   | 5.00 | 00:10:17 | 0.00% | 0 (0.00%) | \$0.00 (0.00%) |
| 635. | Samsung GT-I9000B Galaxy S Vibrant  | 5 (0.01%) | 80.00%  | 4 (0.01%) | 40.00%  | 5.60 | 00:05:10 | 0.00% | 0 (0.00%) | \$0.00 (0.00%) |
| 636. | Samsung GT-I9060 Galaxy Grand Neo   | 5 (0.01%) | 80.00%  | 4 (0.01%) | 60.00%  | 2.00 | 00:00:25 | 0.00% | 0 (0.00%) | \$0.00 (0.00%) |
| 637. | Samsung GT-I9070P Galaxy S Advance  | 5 (0.01%) | 100.00% | 5 (0.01%) | 60.00%  | 2.40 | 00:01:00 | 0.00% | 0 (0.00%) | \$0.00 (0.00%) |
| 638. | Samsung GT-S5222 Star III Duos      | 5 (0.01%) | 100.00% | 5 (0.01%) | 80.00%  | 1.20 | 00:00:12 | 0.00% | 0 (0.00%) | \$0.00 (0.00%) |
| 639. | Samsung GT-S5303 Galaxy Y Plus      | 5 (0.01%) | 60.00%  | 3 (0.01%) | 40.00%  | 6.00 | 00:08:24 | 0.00% | 0 (0.00%) | \$0.00 (0.00%) |
| 640. | Samsung GT-S6012 Galaxy Music Duos  | 5 (0.01%) | 80.00%  | 4 (0.01%) | 40.00%  | 5.20 | 00:10:17 | 0.00% | 0 (0.00%) | \$0.00 (0.00%) |
| 641. | Samsung SCH-I800 Galaxy Tab 7       | 5 (0.01%) | 100.00% | 5 (0.01%) | 60.00%  | 3.40 | 00:03:18 | 0.00% | 0 (0.00%) | \$0.00 (0.00%) |
| 642. | Samsung SCH-i905 Galaxy Tab 10.1 4G | 5 (0.01%) | 100.00% | 5 (0.01%) | 100.00% | 1.00 | 00:00:00 | 0.00% | 0 (0.00%) | \$0.00 (0.00%) |
| 643. | Samsung SCH-S720C Galaxy Proclaim   | 5 (0.01%) | 100.00% | 5 (0.01%) | 40.00%  | 2.60 | 00:00:41 | 0.00% | 0 (0.00%) | \$0.00 (0.00%) |
| 644. | Samsung SGH-I747M Galaxy S III      | 5 (0.01%) | 100.00% | 5 (0.01%) | 60.00%  | 1.60 | 00:00:12 | 0.00% | 0 (0.00%) | \$0.00 (0.00%) |
| 645. | Samsung SGH-I777 Galaxy S II        | 5 (0.01%) | 100.00% | 5 (0.01%) | 80.00%  | 1.20 | 00:00:22 | 0.00% | 0 (0.00%) | \$0.00 (0.00%) |
| 646. | Samsung SGH-T679 Exhibit II 4G      | 5 (0.01%) | 100.00% | 5 (0.01%) | 80.00%  | 2.20 | 00:00:30 | 0.00% | 0 (0.00%) | \$0.00 (0.00%) |
| 647. | Samsung SHV-E270K Galaxy Grand      | 5 (0.01%) | 80.00%  | 4 (0.01%) | 40.00%  | 6.40 | 00:02:26 | 0.00% | 0 (0.00%) | \$0.00 (0.00%) |
| 648. | Samsung SHW-M180S GALAXY Tab (SKT)  | 5 (0.01%) | 100.00% | 5 (0.01%) | 80.00%  | 2.40 | 00:00:40 | 0.00% | 0 (0.00%) | \$0.00 (0.00%) |
| 649. | Samsung SM-G900A Galaxy S5          | 5 (0.01%) | 100.00% | 5 (0.01%) | 60.00%  | 1.80 | 00:00:12 | 0.00% | 0 (0.00%) | \$0.00 (0.00%) |
| 650. | Samsung SM-N900W8 Galaxy Note 3     | 5 (0.01%) | 60.00%  | 3 (0.01%) | 80.00%  | 1.40 | 00:00:06 | 0.00% | 0 (0.00%) | \$0.00 (0.00%) |
| 651. | SonyEricsson E15i Xperia X8         | 5 (0.01%) | 80.00%  | 4 (0.01%) | 60.00%  | 1.60 | 00:00:12 | 0.00% | 0 (0.00%) | \$0.00 (0.00%) |
| 652. | SonyEricsson E16i Walkman 8         | 5 (0.01%) | 40.00%  | 2 (0.00%) | 40.00%  | 8.20 | 00:10:02 | 0.00% | 0 (0.00%) | \$0.00 (0.00%) |
| 653. | SonyEricsson ST15i Xperia Mini      | 5 (0.01%) | 100.00% | 5 (0.01%) | 80.00%  | 1.40 | 00:00:06 | 0.00% | 0 (0.00%) | \$0.00 (0.00%) |
| 654. | Xiaomi 2013022                      | 5 (0.01%) | 100.00% | 5 (0.01%) | 100.00% | 1.00 | 00:00:00 | 0.00% | 0 (0.00%) | \$0.00 (0.00%) |



|      |                                                           |           |         |           |         |      |          |       |           |                |
|------|-----------------------------------------------------------|-----------|---------|-----------|---------|------|----------|-------|-----------|----------------|
| 654. | Red Rice                                                  | 5 (0.01%) | 100.00% | 3 (0.01%) | 100.00% | 1.00 | 00:00:00 | 0.00% | 0 (0.00%) | \$0.00 (0.00%) |
| 655. | ZTE N861 Warp                                             | 5 (0.01%) | 60.00%  | 3 (0.01%) | 60.00%  | 3.00 | 00:01:20 | 0.00% | 0 (0.00%) | \$0.00 (0.00%) |
| 656. | Acer A100 Vangogh                                         | 4 (0.01%) | 75.00%  | 3 (0.01%) | 100.00% | 1.00 | 00:00:00 | 0.00% | 0 (0.00%) | \$0.00 (0.00%) |
| 657. | Alcatel OT-4030> S-POP                                    | 4 (0.01%) | 100.00% | 4 (0.01%) | 50.00%  | 7.50 | 00:03:32 | 0.00% | 0 (0.00%) | \$0.00 (0.00%) |
| 658. | Alcatel OT-7024W One Touch Fierce                         | 4 (0.01%) | 100.00% | 4 (0.01%) | 75.00%  | 1.50 | 00:06:52 | 0.00% | 0 (0.00%) | \$0.00 (0.00%) |
| 659. | Alcatel v860 Smart II 3G                                  | 4 (0.01%) | 50.00%  | 2 (0.00%) | 100.00% | 1.00 | 00:00:00 | 0.00% | 0 (0.00%) | \$0.00 (0.00%) |
| 660. | Arnova AN10BG3 10b G3                                     | 4 (0.01%) | 100.00% | 4 (0.01%) | 100.00% | 1.00 | 00:00:00 | 0.00% | 0 (0.00%) | \$0.00 (0.00%) |
| 661. | Asus Eee Pad Transformer TF101G Eee Pad Transformer TF101 | 4 (0.01%) | 100.00% | 4 (0.01%) | 75.00%  | 1.75 | 00:00:11 | 0.00% | 0 (0.00%) | \$0.00 (0.00%) |
| 662. | BlackBerry 9630 Tour                                      | 4 (0.01%) | 75.00%  | 3 (0.01%) | 50.00%  | 3.00 | 00:05:49 | 0.00% | 0 (0.00%) | \$0.00 (0.00%) |
| 663. | Casio C771 G'zOne                                         | 4 (0.01%) | 75.00%  | 3 (0.01%) | 75.00%  | 1.50 | 00:04:00 | 0.00% | 0 (0.00%) | \$0.00 (0.00%) |
| 664. | DoCoMo SO-02E Xperia Z                                    | 4 (0.01%) | 100.00% | 4 (0.01%) | 100.00% | 1.00 | 00:00:00 | 0.00% | 0 (0.00%) | \$0.00 (0.00%) |
| 665. | DOOGEE DG50C Discovery                                    | 4 (0.01%) | 100.00% | 4 (0.01%) | 75.00%  | 1.50 | 00:00:24 | 0.00% | 0 (0.00%) | \$0.00 (0.00%) |
| 666. | Fly IQ238                                                 | 4 (0.01%) | 75.00%  | 3 (0.01%) | 50.00%  | 3.50 | 00:01:42 | 0.00% | 0 (0.00%) | \$0.00 (0.00%) |
| 667. | Fly IQ442                                                 | 4 (0.01%) | 50.00%  | 2 (0.00%) | 75.00%  | 1.50 | 00:00:06 | 0.00% | 0 (0.00%) | \$0.00 (0.00%) |
| 668. | HP Touchpad                                               | 4 (0.01%) | 100.00% | 4 (0.01%) | 50.00%  | 2.75 | 00:00:14 | 0.00% | 0 (0.00%) | \$0.00 (0.00%) |
| 669. | HTC A510e Wildfire S                                      | 4 (0.01%) | 100.00% | 4 (0.01%) | 50.00%  | 2.00 | 00:01:21 | 0.00% | 0 (0.00%) | \$0.00 (0.00%) |
| 670. | HTC A6366 Aria                                            | 4 (0.01%) | 0.00%   | 0 (0.00%) | 0.00%   | 8.25 | 00:10:55 | 0.00% | 0 (0.00%) | \$0.00 (0.00%) |
| 671. | HTC SensationXE Beats Z715e Sensation                     | 4 (0.01%) | 75.00%  | 3 (0.01%) | 25.00%  | 8.25 | 00:07:42 | 0.00% | 0 (0.00%) | \$0.00 (0.00%) |
| 672. | HTC Spark 7 Trophy                                        | 4 (0.01%) | 0.00%   | 0 (0.00%) | 25.00%  | 5.25 | 00:03:57 | 0.00% | 0 (0.00%) | \$0.00 (0.00%) |
| 673. | HTC T8698 7 Mozart                                        | 4 (0.01%) | 100.00% | 4 (0.01%) | 100.00% | 1.00 | 00:00:00 | 0.00% | 0 (0.00%) | \$0.00 (0.00%) |
| 674. | Huawei C8813                                              | 4 (0.01%) | 100.00% | 4 (0.01%) | 75.00%  | 1.50 | 00:00:13 | 0.00% | 0 (0.00%) | \$0.00 (0.00%) |
| 675. | Huawei G510-0100 Ascend G510                              | 4 (0.01%) | 100.00% | 4 (0.01%) | 75.00%  | 2.00 | 00:00:23 | 0.00% | 0 (0.00%) | \$0.00 (0.00%) |
| 676. | Huawei U8860 Honor                                        | 4 (0.01%) | 100.00% | 4 (0.01%) | 75.00%  | 5.75 | 00:01:29 | 0.00% | 0 (0.00%) | \$0.00 (0.00%) |
| 677. | Kyocera C5133 Event                                       | 4 (0.01%) | 75.00%  | 3 (0.01%) | 75.00%  | 2.25 | 00:00:50 | 0.00% | 0 (0.00%) | \$0.00 (0.00%) |
| 678. | Kyocera C5155 Rise C5155                                  | 4 (0.01%) | 100.00% | 4 (0.01%) | 100.00% | 1.00 | 00:00:00 | 0.00% | 0 (0.00%) | \$0.00 (0.00%) |
| 679. | Lenovo IdeaPad A1 IdeaPad A1 Tablet                       | 4 (0.01%) | 100.00% | 4 (0.01%) | 75.00%  | 1.50 | 00:00:13 | 0.00% | 0 (0.00%) | \$0.00 (0.00%) |
| 680. | LG E970 Optimus G                                         | 4 (0.01%) | 100.00% | 4 (0.01%) | 100.00% | 1.00 | 00:00:00 | 0.00% | 0 (0.00%) | \$0.00 (0.00%) |
| 681. | LG L35G Optimus Logic                                     | 4 (0.01%) | 100.00% | 4 (0.01%) | 100.00% | 1.00 | 00:00:00 | 0.00% | 0 (0.00%) | \$0.00 (0.00%) |
| 682. | LG P970 Optimus Black                                     | 4 (0.01%) | 100.00% | 4 (0.01%) | 100.00% | 1.00 | 00:00:00 | 0.00% | 0 (0.00%) | \$0.00 (0.00%) |

|      |                                         |           |         |           |         |       |          |       |           |                |
|------|-----------------------------------------|-----------|---------|-----------|---------|-------|----------|-------|-----------|----------------|
| 683. | LG T385                                 | 4 (0.01%) | 100.00% | 4 (0.01%) | 100.00% | 1.00  | 00:00:00 | 0.00% | 0 (0.00%) | \$0.00 (0.00%) |
| 684. | Micromax A35 Bolt Ninja A35             | 4 (0.01%) | 100.00% | 4 (0.01%) | 50.00%  | 2.50  | 00:03:08 | 0.00% | 0 (0.00%) | \$0.00 (0.00%) |
| 685. | Motorola Droid 2                        | 4 (0.01%) | 75.00%  | 3 (0.01%) | 25.00%  | 12.25 | 00:20:50 | 0.00% | 0 (0.00%) | \$0.00 (0.00%) |
| 686. | Motorola MB855 Photon                   | 4 (0.01%) | 100.00% | 4 (0.01%) | 75.00%  | 1.50  | 00:00:08 | 0.00% | 0 (0.00%) | \$0.00 (0.00%) |
| 687. | Motorola MOT-EX225                      | 4 (0.01%) | 75.00%  | 3 (0.01%) | 75.00%  | 1.25  | 00:00:12 | 0.00% | 0 (0.00%) | \$0.00 (0.00%) |
| 688. | Motorola MotoMZ616 Xoom 2               | 4 (0.01%) | 25.00%  | 1 (0.00%) | 100.00% | 1.00  | 00:00:00 | 0.00% | 0 (0.00%) | \$0.00 (0.00%) |
| 689. | Motorola XT1033 DVX                     | 4 (0.01%) | 50.00%  | 2 (0.00%) | 75.00%  | 3.25  | 00:01:19 | 0.00% | 0 (0.00%) | \$0.00 (0.00%) |
| 690. | Motorola XT915 RAZR D1                  | 4 (0.01%) | 25.00%  | 1 (0.00%) | 100.00% | 1.00  | 00:00:00 | 0.00% | 0 (0.00%) | \$0.00 (0.00%) |
| 691. | Nokia 301 Asha 301                      | 4 (0.01%) | 75.00%  | 3 (0.01%) | 50.00%  | 1.75  | 00:00:27 | 0.00% | 0 (0.00%) | \$0.00 (0.00%) |
| 692. | Nokia 306                               | 4 (0.01%) | 100.00% | 4 (0.01%) | 100.00% | 1.00  | 00:00:00 | 0.00% | 0 (0.00%) | \$0.00 (0.00%) |
| 693. | Nokia 5130 XpressMusic                  | 4 (0.01%) | 100.00% | 4 (0.01%) | 75.00%  | 1.25  | 00:00:09 | 0.00% | 0 (0.00%) | \$0.00 (0.00%) |
| 694. | Nokia E7-00                             | 4 (0.01%) | 100.00% | 4 (0.01%) | 100.00% | 1.00  | 00:00:00 | 0.00% | 0 (0.00%) | \$0.00 (0.00%) |
| 695. | Nokia Lumia 1520                        | 4 (0.01%) | 100.00% | 4 (0.01%) | 75.00%  | 1.25  | 00:00:05 | 0.00% | 0 (0.00%) | \$0.00 (0.00%) |
| 696. | Pandigital Novel                        | 4 (0.01%) | 100.00% | 4 (0.01%) | 50.00%  | 7.00  | 00:06:57 | 0.00% | 0 (0.00%) | \$0.00 (0.00%) |
| 697. | Pantech IM-A760S SKY Vega Racer (SKT)   | 4 (0.01%) | 100.00% | 4 (0.01%) | 75.00%  | 1.25  | 00:00:03 | 0.00% | 0 (0.00%) | \$0.00 (0.00%) |
| 698. | Pantech IM-A830S Vega Racer 2           | 4 (0.01%) | 25.00%  | 1 (0.00%) | 25.00%  | 6.75  | 00:15:22 | 0.00% | 0 (0.00%) | \$0.00 (0.00%) |
| 699. | Pantech P4100 Element                   | 4 (0.01%) | 50.00%  | 2 (0.00%) | 100.00% | 1.00  | 00:00:00 | 0.00% | 0 (0.00%) | \$0.00 (0.00%) |
| 700. | Polaroid MIDC410                        | 4 (0.01%) | 100.00% | 4 (0.01%) | 50.00%  | 3.75  | 00:01:27 | 0.00% | 0 (0.00%) | \$0.00 (0.00%) |
| 701. | Prestigio PMP5080CPRO MultiPad 5080 Pro | 4 (0.01%) | 25.00%  | 1 (0.00%) | 100.00% | 1.00  | 00:00:00 | 0.00% | 0 (0.00%) | \$0.00 (0.00%) |
| 702. | Samsung GT-B5510 Galaxy Y               | 4 (0.01%) | 100.00% | 4 (0.01%) | 50.00%  | 1.75  | 00:00:28 | 0.00% | 0 (0.00%) | \$0.00 (0.00%) |
| 703. | Samsung GT-C3222                        | 4 (0.01%) | 50.00%  | 2 (0.00%) | 75.00%  | 1.25  | 00:00:09 | 0.00% | 0 (0.00%) | \$0.00 (0.00%) |
| 704. | Samsung GT-I9210T Galaxy SII 4G         | 4 (0.01%) | 100.00% | 4 (0.01%) | 100.00% | 1.00  | 00:00:00 | 0.00% | 0 (0.00%) | \$0.00 (0.00%) |
| 705. | Samsung GT-P7501 Galaxy Tab 10.1N       | 4 (0.01%) | 100.00% | 4 (0.01%) | 100.00% | 1.00  | 00:00:00 | 0.00% | 0 (0.00%) | \$0.00 (0.00%) |
| 706. | Samsung GT-S5270L Ch@t 527              | 4 (0.01%) | 100.00% | 4 (0.01%) | 50.00%  | 1.75  | 00:01:30 | 0.00% | 0 (0.00%) | \$0.00 (0.00%) |
| 707. | Samsung GT-S5303B Galaxy Y Plus         | 4 (0.01%) | 50.00%  | 2 (0.00%) | 50.00%  | 2.75  | 00:01:05 | 0.00% | 0 (0.00%) | \$0.00 (0.00%) |
| 708. | Samsung GT-S5369 Galaxy Y               | 4 (0.01%) | 100.00% | 4 (0.01%) | 100.00% | 1.00  | 00:00:00 | 0.00% | 0 (0.00%) | \$0.00 (0.00%) |
| 709. | Samsung GT-S7270L Galaxy Ace 3          | 4 (0.01%) | 100.00% | 4 (0.01%) | 100.00% | 1.00  | 00:00:00 | 0.00% | 0 (0.00%) | \$0.00 (0.00%) |
| 710. | Samsung GT-S7275 Galaxy Ace 3 LTE       | 4 (0.01%) | 75.00%  | 3 (0.01%) | 50.00%  | 2.50  | 00:01:02 | 0.00% | 0 (0.00%) | \$0.00 (0.00%) |

|      |                                         |           |         |           |         |      |          |       |           |                |
|------|-----------------------------------------|-----------|---------|-----------|---------|------|----------|-------|-----------|----------------|
| 711. | Samsung SC-06D Galaxy S III             | 4 (0.01%) | 100.00% | 4 (0.01%) | 75.00%  | 3.50 | 00:02:11 | 0.00% | 0 (0.00%) | \$0.00 (0.00%) |
| 712. | Samsung SCH-I415 Galaxy Stratosphere II | 4 (0.01%) | 100.00% | 4 (0.01%) | 75.00%  | 1.50 | 00:08:10 | 0.00% | 0 (0.00%) | \$0.00 (0.00%) |
| 713. | Samsung SCH-i509 Galaxy Young CDMA      | 4 (0.01%) | 50.00%  | 2 (0.00%) | 100.00% | 1.00 | 00:00:00 | 0.00% | 0 (0.00%) | \$0.00 (0.00%) |
| 714. | Samsung SCH-I925 Galaxy Note 10.1 LTE   | 4 (0.01%) | 100.00% | 4 (0.01%) | 75.00%  | 1.75 | 00:00:09 | 0.00% | 0 (0.00%) | \$0.00 (0.00%) |
| 715. | Samsung SCH-R530M Galaxy S III          | 4 (0.01%) | 100.00% | 4 (0.01%) | 50.00%  | 2.25 | 00:00:16 | 0.00% | 0 (0.00%) | \$0.00 (0.00%) |
| 716. | Samsung SCH-U660 Convoy 2               | 4 (0.01%) | 100.00% | 4 (0.01%) | 75.00%  | 1.75 | 00:00:20 | 0.00% | 0 (0.00%) | \$0.00 (0.00%) |
| 717. | Samsung SHV-E160L Galaxy Note           | 4 (0.01%) | 100.00% | 4 (0.01%) | 75.00%  | 1.25 | 00:00:04 | 0.00% | 0 (0.00%) | \$0.00 (0.00%) |
| 718. | Samsung SM-G3815 Galaxy Express 2       | 4 (0.01%) | 100.00% | 4 (0.01%) | 75.00%  | 2.00 | 00:00:34 | 0.00% | 0 (0.00%) | \$0.00 (0.00%) |
| 719. | Samsung SM-N9006 Galaxy Note 3          | 4 (0.01%) | 50.00%  | 2 (0.00%) | 75.00%  | 1.25 | 00:01:48 | 0.00% | 0 (0.00%) | \$0.00 (0.00%) |
| 720. | Samsung SM-N900P Galaxy Note 3          | 4 (0.01%) | 50.00%  | 2 (0.00%) | 75.00%  | 1.25 | 00:00:07 | 0.00% | 0 (0.00%) | \$0.00 (0.00%) |
| 721. | Samsung SM-P601                         | 4 (0.01%) | 100.00% | 4 (0.01%) | 75.00%  | 2.75 | 00:01:05 | 0.00% | 0 (0.00%) | \$0.00 (0.00%) |
| 722. | Samsung SM-T217S Galaxy Tab 3 7.0       | 4 (0.01%) | 50.00%  | 2 (0.00%) | 50.00%  | 1.75 | 00:00:16 | 0.00% | 0 (0.00%) | \$0.00 (0.00%) |
| 723. | Samsung SPH-L300 Galaxy Victory 4G LTE  | 4 (0.01%) | 75.00%  | 3 (0.01%) | 50.00%  | 2.50 | 00:00:37 | 0.00% | 0 (0.00%) | \$0.00 (0.00%) |
| 724. | Samsung SPH-M840 Galaxy Ring            | 4 (0.01%) | 100.00% | 4 (0.01%) | 75.00%  | 1.25 | 00:00:01 | 0.00% | 0 (0.00%) | \$0.00 (0.00%) |
| 725. | Sony C6503 Xperia ZL                    | 4 (0.01%) | 75.00%  | 3 (0.01%) | 75.00%  | 2.00 | 00:00:14 | 0.00% | 0 (0.00%) | \$0.00 (0.00%) |
| 726. | Sony C6833 Xperia Z Ultra               | 4 (0.01%) | 75.00%  | 3 (0.01%) | 50.00%  | 2.00 | 00:00:18 | 0.00% | 0 (0.00%) | \$0.00 (0.00%) |
| 727. | Sony SonySO-03E Xperia Tablet Z LTE     | 4 (0.01%) | 100.00% | 4 (0.01%) | 75.00%  | 1.25 | 00:00:02 | 0.00% | 0 (0.00%) | \$0.00 (0.00%) |
| 728. | SonyEricsson LT26w Xperia Acro S        | 4 (0.01%) | 75.00%  | 3 (0.01%) | 75.00%  | 2.00 | 00:00:37 | 0.00% | 0 (0.00%) | \$0.00 (0.00%) |
| 729. | SonyEricsson LT28i Xperia Ion           | 4 (0.01%) | 100.00% | 4 (0.01%) | 75.00%  | 1.75 | 00:00:49 | 0.00% | 0 (0.00%) | \$0.00 (0.00%) |
| 730. | SonyEricsson MT25i Xperia neo L         | 4 (0.01%) | 100.00% | 4 (0.01%) | 75.00%  | 1.75 | 00:00:55 | 0.00% | 0 (0.00%) | \$0.00 (0.00%) |
| 731. | SonyEricsson U20i Xperia X10 Mini pro   | 4 (0.01%) | 100.00% | 4 (0.01%) | 75.00%  | 2.00 | 00:01:07 | 0.00% | 0 (0.00%) | \$0.00 (0.00%) |
| 732. | SonyEricsson X10a Xperia X10            | 4 (0.01%) | 75.00%  | 3 (0.01%) | 75.00%  | 5.25 | 00:01:05 | 0.00% | 0 (0.00%) | \$0.00 (0.00%) |
| 733. | T-Mobile myTouch myTouch                | 4 (0.01%) | 75.00%  | 3 (0.01%) | 50.00%  | 2.75 | 00:04:14 | 0.00% | 0 (0.00%) | \$0.00 (0.00%) |
| 734. | T-Mobile myTouch myTouch Q              | 4 (0.01%) | 100.00% | 4 (0.01%) | 100.00% | 1.00 | 00:00:00 | 0.00% | 0 (0.00%) | \$0.00 (0.00%) |
| 735. | Tecno N3                                | 4 (0.01%) | 50.00%  | 2 (0.00%) | 50.00%  | 1.50 | 00:01:35 | 0.00% | 0 (0.00%) | \$0.00 (0.00%) |

| Rank | Device                                | OS         | OS Version | RAM   | Storage | Price | Time     | Score   | Crashes | Crash Rate | Crash Cost     |
|------|---------------------------------------|------------|------------|-------|---------|-------|----------|---------|---------|------------|----------------|
| 736. | Tesco Hudl HT7S3                      | Android    | 4.1.2      | 1GB   | 16GB    | \$150 | 00:02:43 | 75.00%  | 0       | 0.00%      | \$0.00 (0.00%) |
| 737. | Virgin Mobile Chaser                  | Android    | 4.1.2      | 512MB | 8GB     | \$100 | 00:00:50 | 50.00%  | 0       | 0.00%      | \$0.00 (0.00%) |
| 738. | Woo Comet PAD-703                     | Android    | 4.1.2      | 512MB | 8GB     | \$110 | 00:07:43 | 25.00%  | 0       | 0.00%      | \$0.00 (0.00%) |
| 739. | Xiaomi MI 2S                          | Android    | 4.1.2      | 1GB   | 16GB    | \$100 | 00:00:00 | 100.00% | 0       | 0.00%      | \$0.00 (0.00%) |
| 740. | Xiaomi MI-2C                          | Android    | 4.1.2      | 512MB | 8GB     | \$100 | 00:00:00 | 25.00%  | 0       | 0.00%      | \$0.00 (0.00%) |
| 741. | ZTE N860                              | Android    | 4.1.2      | 512MB | 8GB     | \$110 | 00:00:57 | 75.00%  | 0       | 0.00%      | \$0.00 (0.00%) |
| 742. | ZTE U V856 Movistar One               | Android    | 4.1.2      | 1GB   | 16GB    | \$150 | 00:09:57 | 100.00% | 0       | 0.00%      | \$0.00 (0.00%) |
| 743. | ZTE X500 Score                        | Android    | 4.1.2      | 512MB | 8GB     | \$110 | 00:02:04 | 25.00%  | 0       | 0.00%      | \$0.00 (0.00%) |
| 744. | Acer A511                             | Android    | 4.1.2      | 512MB | 8GB     | \$100 | 00:00:00 | 66.67%  | 0       | 0.00%      | \$0.00 (0.00%) |
| 745. | Acer V370 Liquid E2 Duo               | Android    | 4.1.2      | 1GB   | 16GB    | \$150 | 00:03:31 | 100.00% | 0       | 0.00%      | \$0.00 (0.00%) |
| 746. | Alcatel One Touch 6033A Idol Ultra    | Android    | 4.1.2      | 512MB | 8GB     | \$100 | 00:02:32 | 100.00% | 0       | 0.00%      | \$0.00 (0.00%) |
| 747. | Alcatel one touch 906Y one touch 906Y | Android    | 4.1.2      | 512MB | 8GB     | \$100 | 00:00:00 | 100.00% | 0       | 0.00%      | \$0.00 (0.00%) |
| 748. | Alcatel OT-6010> One Touch Star 6010X | Android    | 4.1.2      | 512MB | 8GB     | \$100 | 00:01:40 | 66.67%  | 0       | 0.00%      | \$0.00 (0.00%) |
| 749. | Alcatel OT-6030> One Touch Idol       | Android    | 4.1.2      | 512MB | 8GB     | \$100 | 00:00:00 | 100.00% | 0       | 0.00%      | \$0.00 (0.00%) |
| 750. | Alcatel OT-992D One Touch 992D        | Android    | 4.1.2      | 512MB | 8GB     | \$100 | 00:00:00 | 100.00% | 0       | 0.00%      | \$0.00 (0.00%) |
| 751. | Alcatel OT-T10 One Touch T10          | Android    | 4.1.2      | 512MB | 8GB     | \$100 | 00:00:11 | 66.67%  | 0       | 0.00%      | \$0.00 (0.00%) |
| 752. | BlackBerry 8530 Curve                 | OS/Android | 4.1.2      | 512MB | 8GB     | \$110 | 00:01:46 | 100.00% | 0       | 0.00%      | \$0.00 (0.00%) |
| 753. | Coby MID8048 Kyros MID8048            | Android    | 4.1.2      | 512MB | 8GB     | \$100 | 00:00:33 | 100.00% | 0       | 0.00%      | \$0.00 (0.00%) |
| 754. | Dell Streak                           | Android    | 4.1.2      | 512MB | 8GB     | \$110 | 00:01:05 | 100.00% | 0       | 0.00%      | \$0.00 (0.00%) |
| 755. | DoCoMo N-08D MEDIAS TAB UL            | Android    | 4.1.2      | 512MB | 8GB     | \$100 | 00:00:25 | 100.00% | 0       | 0.00%      | \$0.00 (0.00%) |
| 756. | Flytouch VC882 FJ Vortex              | Android    | 4.1.2      | 512MB | 8GB     | \$110 | 00:35:34 | 66.67%  | 0       | 0.00%      | \$0.00 (0.00%) |
| 757. | HTC A3333 Wildfire                    | Android    | 4.1.2      | 512MB | 8GB     | \$100 | 00:00:49 | 100.00% | 0       | 0.00%      | \$0.00 (0.00%) |
| 758. | HTC A9191 Desire HD                   | Android    | 4.1.2      | 512MB | 8GB     | \$100 | 00:00:04 | 100.00% | 0       | 0.00%      | \$0.00 (0.00%) |
| 759. | HTC ADR6425LVW Rezound                | Android    | 4.1.2      | 512MB | 8GB     | \$100 | 00:00:00 | 100.00% | 0       | 0.00%      | \$0.00 (0.00%) |
| 760. | HTC APA7373KT EVO Shift 4G            | Android    | 4.1.2      | 512MB | 8GB     | \$100 | 00:00:55 | 66.67%  | 0       | 0.00%      | \$0.00 (0.00%) |
| 761. | HTC HTC6500LVW 4G One                 | Android    | 4.1.2      | 512MB | 8GB     | \$100 | 00:00:00 | 100.00% | 0       | 0.00%      | \$0.00 (0.00%) |
| 762. | HTC myTouch 4G Slide                  | Android    | 4.1.2      | 512MB | 8GB     | \$100 | 00:01:06 | 66.67%  | 0       | 0.00%      | \$0.00 (0.00%) |
| 763. | HTC One SV                            | Android    | 4.1.2      | 512MB | 8GB     | \$100 | 00:00:17 | 100.00% | 0       | 0.00%      | \$0.00 (0.00%) |
| 764. | HTC S710E Incredible S                | Android    | 4.1.2      | 512MB | 8GB     | \$100 | 00:00:13 | 66.67%  | 0       | 0.00%      | \$0.00 (0.00%) |
| 765. | HTC T9292 HD7                         | Android    | 4.1.2      | 512MB | 8GB     | \$100 | 00:00:16 | 66.67%  | 0       | 0.00%      | \$0.00 (0.00%) |
| 766. | HTC T9292 HD7                         | Android    | 4.1.2      | 512MB | 8GB     | \$100 | 00:00:16 | 66.67%  | 0       | 0.00%      | \$0.00 (0.00%) |

|      |                                     |           |         |           |         |       |          |       |           |                |
|------|-------------------------------------|-----------|---------|-----------|---------|-------|----------|-------|-----------|----------------|
| 766. | HTC Touch Pro Raphael 100           | 3 (0.00%) | 33.33%  | 1 (0.00%) | 66.67%  | 2.33  | 00:04:15 | 0.00% | 0 (0.00%) | \$0.00 (0.00%) |
| 767. | HTC X710a Raider 4G                 | 3 (0.00%) | 100.00% | 3 (0.01%) | 66.67%  | 1.67  | 00:00:29 | 0.00% | 0 (0.00%) | \$0.00 (0.00%) |
| 768. | HTC Z710 Sensation 4G               | 3 (0.00%) | 100.00% | 3 (0.01%) | 100.00% | 1.00  | 00:00:00 | 0.00% | 0 (0.00%) | \$0.00 (0.00%) |
| 769. | HTC Zara Desire 601                 | 3 (0.00%) | 100.00% | 3 (0.01%) | 100.00% | 1.00  | 00:00:00 | 0.00% | 0 (0.00%) | \$0.00 (0.00%) |
| 770. | Huawei G510-0010 Ascend G510        | 3 (0.00%) | 100.00% | 3 (0.01%) | 0.00%   | 2.00  | 00:01:25 | 0.00% | 0 (0.00%) | \$0.00 (0.00%) |
| 771. | Huawei M931 Premia 4G               | 3 (0.00%) | 66.67%  | 2 (0.00%) | 100.00% | 1.00  | 00:00:00 | 0.00% | 0 (0.00%) | \$0.00 (0.00%) |
| 772. | Huawei S7-301w Mediapad             | 3 (0.00%) | 66.67%  | 2 (0.00%) | 100.00% | 1.00  | 00:00:00 | 0.00% | 0 (0.00%) | \$0.00 (0.00%) |
| 773. | Huawei U8800-51 Impulse 4G for AT&T | 3 (0.00%) | 100.00% | 3 (0.01%) | 100.00% | 1.00  | 00:00:00 | 0.00% | 0 (0.00%) | \$0.00 (0.00%) |
| 774. | Huawei U8815 Ascent G 300           | 3 (0.00%) | 100.00% | 3 (0.01%) | 33.33%  | 5.33  | 00:03:28 | 0.00% | 0 (0.00%) | \$0.00 (0.00%) |
| 775. | Huawei U9508 Honor 2                | 3 (0.00%) | 100.00% | 3 (0.01%) | 66.67%  | 2.67  | 00:00:56 | 0.00% | 0 (0.00%) | \$0.00 (0.00%) |
| 776. | Huawei UM840 Evolution              | 3 (0.00%) | 100.00% | 3 (0.01%) | 100.00% | 1.00  | 00:00:00 | 0.00% | 0 (0.00%) | \$0.00 (0.00%) |
| 777. | Huawei W1-U34 Ascend W1             | 3 (0.00%) | 33.33%  | 1 (0.00%) | 33.33%  | 4.00  | 00:01:49 | 0.00% | 0 (0.00%) | \$0.00 (0.00%) |
| 778. | Karbonn A111 Smart 111              | 3 (0.00%) | 66.67%  | 2 (0.00%) | 33.33%  | 7.33  | 00:16:07 | 0.00% | 0 (0.00%) | \$0.00 (0.00%) |
| 779. | Karbonn Titanium S5                 | 3 (0.00%) | 100.00% | 3 (0.01%) | 100.00% | 1.00  | 00:00:00 | 0.00% | 0 (0.00%) | \$0.00 (0.00%) |
| 780. | KDDI SHL21 Aquos Phone SHL21        | 3 (0.00%) | 100.00% | 3 (0.01%) | 100.00% | 1.00  | 00:00:00 | 0.00% | 0 (0.00%) | \$0.00 (0.00%) |
| 781. | Kyocera ISW11K Digno ISW11K         | 3 (0.00%) | 100.00% | 3 (0.01%) | 100.00% | 1.00  | 00:00:00 | 0.00% | 0 (0.00%) | \$0.00 (0.00%) |
| 782. | Lava 501 Iris 501                   | 3 (0.00%) | 100.00% | 3 (0.01%) | 100.00% | 1.00  | 00:00:00 | 0.00% | 0 (0.00%) | \$0.00 (0.00%) |
| 783. | Lava N400 Iris N400                 | 3 (0.00%) | 100.00% | 3 (0.01%) | 66.67%  | 1.67  | 00:02:59 | 0.00% | 0 (0.00%) | \$0.00 (0.00%) |
| 784. | Lenovo A850                         | 3 (0.00%) | 100.00% | 3 (0.01%) | 100.00% | 1.00  | 00:00:00 | 0.00% | 0 (0.00%) | \$0.00 (0.00%) |
| 785. | Lenovo S890                         | 3 (0.00%) | 0.00%   | 0 (0.00%) | 0.00%   | 24.67 | 00:13:51 | 0.00% | 0 (0.00%) | \$0.00 (0.00%) |
| 786. | LG D801 G2                          | 3 (0.00%) | 33.33%  | 1 (0.00%) | 100.00% | 1.00  | 00:00:00 | 0.00% | 0 (0.00%) | \$0.00 (0.00%) |
| 787. | LG E405 Optimus L3                  | 3 (0.00%) | 100.00% | 3 (0.01%) | 66.67%  | 1.33  | 00:00:11 | 0.00% | 0 (0.00%) | \$0.00 (0.00%) |
| 788. | LG E612 Optimus L5                  | 3 (0.00%) | 100.00% | 3 (0.01%) | 66.67%  | 1.67  | 00:00:12 | 0.00% | 0 (0.00%) | \$0.00 (0.00%) |
| 789. | LG E900 Optimus 7                   | 3 (0.00%) | 66.67%  | 2 (0.00%) | 33.33%  | 6.00  | 00:03:22 | 0.00% | 0 (0.00%) | \$0.00 (0.00%) |
| 790. | LG LG/D500                          | 3 (0.00%) | 100.00% | 3 (0.01%) | 100.00% | 1.00  | 00:00:00 | 0.00% | 0 (0.00%) | \$0.00 (0.00%) |
| 791. | LG LG730 Venice                     | 3 (0.00%) | 100.00% | 3 (0.01%) | 100.00% | 1.00  | 00:00:00 | 0.00% | 0 (0.00%) | \$0.00 (0.00%) |
| 792. | LG LG870 Optimus F7                 | 3 (0.00%) | 100.00% | 3 (0.01%) | 66.67%  | 5.67  | 00:02:40 | 0.00% | 0 (0.00%) | \$0.00 (0.00%) |
| 793. | LG LS720 Optimus F3                 | 3 (0.00%) | 100.00% | 3 (0.01%) | 100.00% | 1.00  | 00:00:00 | 0.00% | 0 (0.00%) | \$0.00 (0.00%) |
| 794. | LG P500                             | 3 (0.00%) | 100.00% | 3 (0.01%) | 100.00% | 1.00  | 00:00:00 | 0.00% | 0 (0.00%) | \$0.00 (0.00%) |
| 795. | LG P690f Optimus Spirit             | 3 (0.00%) | 100.00% | 3 (0.01%) | 33.33%  | 5.00  | 00:01:46 | 0.00% | 0 (0.00%) | \$0.00 (0.00%) |
| 796. | LG P716 Optimus L7 II               | 3 (0.00%) | 100.00% | 3 (0.01%) | 66.67%  | 3.00  | 00:00:44 | 0.00% | 0 (0.00%) | \$0.00 (0.00%) |

|      |                                     |           |         |           |         |       |          |       |           |                |
|------|-------------------------------------|-----------|---------|-----------|---------|-------|----------|-------|-----------|----------------|
| 797. | LG P720h Optimus 3D Max             | 3 (0.00%) | 100.00% | 3 (0.01%) | 33.33%  | 3.67  | 00:03:22 | 0.00% | 0 (0.00%) | \$0.00 (0.00%) |
| 798. | LG P990 Optimus 2X                  | 3 (0.00%) | 100.00% | 3 (0.01%) | 100.00% | 1.00  | 00:00:00 | 0.00% | 0 (0.00%) | \$0.00 (0.00%) |
| 799. | LG SU640 Optimus LTE                | 3 (0.00%) | 33.33%  | 1 (0.00%) | 100.00% | 1.00  | 00:00:00 | 0.00% | 0 (0.00%) | \$0.00 (0.00%) |
| 800. | LG VS950 4G Intuition               | 3 (0.00%) | 66.67%  | 2 (0.00%) | 66.67%  | 2.33  | 00:00:15 | 0.00% | 0 (0.00%) | \$0.00 (0.00%) |
| 801. | MediaTek Y220-U05                   | 3 (0.00%) | 33.33%  | 1 (0.00%) | 0.00%   | 12.67 | 00:09:30 | 0.00% | 0 (0.00%) | \$0.00 (0.00%) |
| 802. | Micromax A111 Canvas Doodle         | 3 (0.00%) | 100.00% | 3 (0.01%) | 100.00% | 1.00  | 00:00:00 | 0.00% | 0 (0.00%) | \$0.00 (0.00%) |
| 803. | Micromax A25 A25 Smarty             | 3 (0.00%) | 100.00% | 3 (0.01%) | 66.67%  | 1.33  | 00:00:27 | 0.00% | 0 (0.00%) | \$0.00 (0.00%) |
| 804. | Micromax A57 Ninja 3                | 3 (0.00%) | 100.00% | 3 (0.01%) | 66.67%  | 1.67  | 00:01:11 | 0.00% | 0 (0.00%) | \$0.00 (0.00%) |
| 805. | Micromax A74 Canvas Fun             | 3 (0.00%) | 100.00% | 3 (0.01%) | 66.67%  | 1.33  | 00:01:50 | 0.00% | 0 (0.00%) | \$0.00 (0.00%) |
| 806. | Micromax A88                        | 3 (0.00%) | 66.67%  | 2 (0.00%) | 100.00% | 1.00  | 00:00:00 | 0.00% | 0 (0.00%) | \$0.00 (0.00%) |
| 807. | Micromax A92                        | 3 (0.00%) | 100.00% | 3 (0.01%) | 33.33%  | 1.67  | 00:00:57 | 0.00% | 0 (0.00%) | \$0.00 (0.00%) |
| 808. | Motorola EX118 MOTOKEY XT           | 3 (0.00%) | 100.00% | 3 (0.01%) | 100.00% | 1.00  | 00:00:00 | 0.00% | 0 (0.00%) | \$0.00 (0.00%) |
| 809. | Motorola MZ608 XOOM 2 ME 3G         | 3 (0.00%) | 100.00% | 3 (0.01%) | 100.00% | 1.00  | 00:00:00 | 0.00% | 0 (0.00%) | \$0.00 (0.00%) |
| 810. | Motorola XT531 Fire XT              | 3 (0.00%) | 100.00% | 3 (0.01%) | 33.33%  | 5.33  | 00:05:43 | 0.00% | 0 (0.00%) | \$0.00 (0.00%) |
| 811. | Nokia 2055 Asha 2055                | 3 (0.00%) | 100.00% | 3 (0.01%) | 66.67%  | 1.33  | 00:00:17 | 0.00% | 0 (0.00%) | \$0.00 (0.00%) |
| 812. | Nokia 603                           | 3 (0.00%) | 100.00% | 3 (0.01%) | 66.67%  | 1.67  | 00:00:17 | 0.00% | 0 (0.00%) | \$0.00 (0.00%) |
| 813. | Nokia 6120 classic                  | 3 (0.00%) | 100.00% | 3 (0.01%) | 33.33%  | 2.67  | 00:01:50 | 0.00% | 0 (0.00%) | \$0.00 (0.00%) |
| 814. | Nokia C2-00                         | 3 (0.00%) | 100.00% | 3 (0.01%) | 0.00%   | 4.00  | 00:02:32 | 0.00% | 0 (0.00%) | \$0.00 (0.00%) |
| 815. | Nokia Lumia 928                     | 3 (0.00%) | 100.00% | 3 (0.01%) | 66.67%  | 2.00  | 00:00:43 | 0.00% | 0 (0.00%) | \$0.00 (0.00%) |
| 816. | Oppo R821T Flnd Muse                | 3 (0.00%) | 100.00% | 3 (0.01%) | 66.67%  | 3.00  | 00:00:57 | 0.00% | 0 (0.00%) | \$0.00 (0.00%) |
| 817. | Pantech IM-A850S Vega R3            | 3 (0.00%) | 100.00% | 3 (0.01%) | 33.33%  | 3.67  | 00:01:30 | 0.00% | 0 (0.00%) | \$0.00 (0.00%) |
| 818. | Pomp W89                            | 3 (0.00%) | 33.33%  | 1 (0.00%) | 0.00%   | 12.33 | 00:22:44 | 0.00% | 0 (0.00%) | \$0.00 (0.00%) |
| 819. | Samsung GT-E2252                    | 3 (0.00%) | 100.00% | 3 (0.01%) | 100.00% | 1.00  | 00:00:00 | 0.00% | 0 (0.00%) | \$0.00 (0.00%) |
| 820. | Samsung GT-I9100T Galaxy S II       | 3 (0.00%) | 100.00% | 3 (0.01%) | 100.00% | 1.00  | 00:00:00 | 0.00% | 0 (0.00%) | \$0.00 (0.00%) |
| 821. | Samsung GT-I9103 Galaxy SII         | 3 (0.00%) | 66.67%  | 2 (0.00%) | 100.00% | 1.00  | 00:00:00 | 0.00% | 0 (0.00%) | \$0.00 (0.00%) |
| 822. | Samsung GT-N7105T Galaxy Note II    | 3 (0.00%) | 100.00% | 3 (0.01%) | 100.00% | 1.00  | 00:00:00 | 0.00% | 0 (0.00%) | \$0.00 (0.00%) |
| 823. | Samsung GT-P7310 Galaxy Tab 8.9     | 3 (0.00%) | 100.00% | 3 (0.01%) | 33.33%  | 2.67  | 00:01:47 | 0.00% | 0 (0.00%) | \$0.00 (0.00%) |
| 824. | Samsung GT-S3850                    | 3 (0.00%) | 100.00% | 3 (0.01%) | 33.33%  | 1.67  | 00:00:19 | 0.00% | 0 (0.00%) | \$0.00 (0.00%) |
| 825. | Samsung GT-S5310B Galaxy Pocket Neo | 3 (0.00%) | 100.00% | 3 (0.01%) | 66.67%  | 3.67  | 00:00:14 | 0.00% | 0 (0.00%) | \$0.00 (0.00%) |
| 826. | Samsung GT-S5363                    | 3 (0.00%) | 66.67%  | 2 (0.00%) | 100.00% | 1.00  | 00:00:00 | 0.00% | 0 (0.00%) | \$0.00 (0.00%) |
| 827. | Samsung GT-                         | 3 (0.00%) | 100.00% | 3 (0.01%) | 66.67%  | 1.33  | 00:00:43 | 0.00% | 0 (0.00%) | \$0.00 (0.00%) |

|      |                                              |           |         |           |         |       |          |       |           |                |
|------|----------------------------------------------|-----------|---------|-----------|---------|-------|----------|-------|-----------|----------------|
| 827. | S5380                                        | 3 (0.00%) | 100.00% | 3 (0.01%) | 66.67%  | 1.33  | 00:00:43 | 0.00% | 0 (0.00%) | \$0.00 (0.00%) |
| 828. | Samsung GT-S5830T Galaxy Ace                 | 3 (0.00%) | 100.00% | 3 (0.01%) | 66.67%  | 1.33  | 00:00:08 | 0.00% | 0 (0.00%) | \$0.00 (0.00%) |
| 829. | Samsung GT-S8600 Wave 3                      | 3 (0.00%) | 100.00% | 3 (0.01%) | 66.67%  | 1.67  | 00:00:16 | 0.00% | 0 (0.00%) | \$0.00 (0.00%) |
| 830. | Samsung SC-02C Galaxy S II SC-02C for DoCoMo | 3 (0.00%) | 100.00% | 3 (0.01%) | 100.00% | 1.00  | 00:00:00 | 0.00% | 0 (0.00%) | \$0.00 (0.00%) |
| 831. | Samsung SCH-I747M Galaxy S III               | 3 (0.00%) | 100.00% | 3 (0.01%) | 100.00% | 1.00  | 00:00:00 | 0.00% | 0 (0.00%) | \$0.00 (0.00%) |
| 832. | Samsung SCH-R920 Galaxy Attain 4G            | 3 (0.00%) | 66.67%  | 2 (0.00%) | 100.00% | 1.00  | 00:00:00 | 0.00% | 0 (0.00%) | \$0.00 (0.00%) |
| 833. | Samsung SCH-R970 Galaxy S IV                 | 3 (0.00%) | 100.00% | 3 (0.01%) | 66.67%  | 1.67  | 00:00:19 | 0.00% | 0 (0.00%) | \$0.00 (0.00%) |
| 834. | Samsung SGH-S959G Galaxy S II                | 3 (0.00%) | 100.00% | 3 (0.01%) | 100.00% | 1.00  | 00:00:00 | 0.00% | 0 (0.00%) | \$0.00 (0.00%) |
| 835. | Samsung SGH-X100                             | 3 (0.00%) | 100.00% | 3 (0.01%) | 66.67%  | 1.33  | 00:00:10 | 0.00% | 0 (0.00%) | \$0.00 (0.00%) |
| 836. | Samsung SHV-E230S Galaxy Note 10.1           | 3 (0.00%) | 33.33%  | 1 (0.00%) | 33.33%  | 13.33 | 00:03:46 | 0.00% | 0 (0.00%) | \$0.00 (0.00%) |
| 837. | Samsung SHV-E330S Galaxy S IV                | 3 (0.00%) | 33.33%  | 1 (0.00%) | 66.67%  | 5.00  | 00:08:52 | 0.00% | 0 (0.00%) | \$0.00 (0.00%) |
| 838. | Samsung SHW-M250S GALAXY S II (SKT)          | 3 (0.00%) | 100.00% | 3 (0.01%) | 66.67%  | 3.33  | 00:01:22 | 0.00% | 0 (0.00%) | \$0.00 (0.00%) |
| 839. | Samsung SHW-M480S Galaxy Note 10.1           | 3 (0.00%) | 100.00% | 3 (0.01%) | 0.00%   | 4.00  | 00:01:17 | 0.00% | 0 (0.00%) | \$0.00 (0.00%) |
| 840. | Samsung SM-P605 Galaxy Note 10.1 2014        | 3 (0.00%) | 100.00% | 3 (0.01%) | 66.67%  | 1.67  | 00:00:10 | 0.00% | 0 (0.00%) | \$0.00 (0.00%) |
| 841. | Samsung SPH-L300 Gogh                        | 3 (0.00%) | 100.00% | 3 (0.01%) | 66.67%  | 2.00  | 00:01:13 | 0.00% | 0 (0.00%) | \$0.00 (0.00%) |
| 842. | Samsung SPH-L720 Galaxy S4                   | 3 (0.00%) | 100.00% | 3 (0.01%) | 100.00% | 1.00  | 00:00:00 | 0.00% | 0 (0.00%) | \$0.00 (0.00%) |
| 843. | Samsung SPH-M820 Galaxy Prevail              | 3 (0.00%) | 100.00% | 3 (0.01%) | 66.67%  | 1.33  | 00:00:12 | 0.00% | 0 (0.00%) | \$0.00 (0.00%) |
| 844. | Samsung SPH-M900 Moment                      | 3 (0.00%) | 100.00% | 3 (0.01%) | 66.67%  | 8.67  | 00:06:50 | 0.00% | 0 (0.00%) | \$0.00 (0.00%) |
| 845. | Samsung YP-GI1 Galaxy Player 4.2             | 3 (0.00%) | 100.00% | 3 (0.01%) | 100.00% | 1.00  | 00:00:00 | 0.00% | 0 (0.00%) | \$0.00 (0.00%) |
| 846. | Sharp A01 INFOBAR A01 for KDDI au iida       | 3 (0.00%) | 66.67%  | 2 (0.00%) | 100.00% | 1.00  | 00:00:00 | 0.00% | 0 (0.00%) | \$0.00 (0.00%) |
| 847. | Sharp IS05 IS05 for KDDI                     | 3 (0.00%) | 33.33%  | 1 (0.00%) | 33.33%  | 4.00  | 00:00:57 | 0.00% | 0 (0.00%) | \$0.00 (0.00%) |
| 848. | Smartfren Andromax-c                         | 3 (0.00%) | 100.00% | 3 (0.01%) | 100.00% | 1.00  | 00:00:00 | 0.00% | 0 (0.00%) | \$0.00 (0.00%) |
| 849. | Sony C6902 Xperia Z1                         | 3 (0.00%) | 66.67%  | 2 (0.00%) | 66.67%  | 2.00  | 00:00:15 | 0.00% | 0 (0.00%) | \$0.00 (0.00%) |
| 850. | Sony D5503 Xperia Z1 Compact                 | 3 (0.00%) | 100.00% | 3 (0.01%) | 100.00% | 1.00  | 00:00:00 | 0.00% | 0 (0.00%) | \$0.00 (0.00%) |
| 851. | Sony Ericsson LT26ii Xperia SL               | 3 (0.00%) | 100.00% | 3 (0.01%) | 66.67%  | 1.67  | 00:00:24 | 0.00% | 0 (0.00%) | \$0.00 (0.00%) |
| 852. | SonyEricsson C6606 Xperia Z                  | 3 (0.00%) | 100.00% | 3 (0.01%) | 100.00% | 1.00  | 00:00:00 | 0.00% | 0 (0.00%) | \$0.00 (0.00%) |

| ID   | Device Name                            | Count     | Percentage | Count     | Percentage | Count | Time     | Percentage | Count     | Percentage     |
|------|----------------------------------------|-----------|------------|-----------|------------|-------|----------|------------|-----------|----------------|
| 853. | SonyEricsson MT11a Xperia Neo V        | 3 (0.00%) | 100.00%    | 3 (0.01%) | 33.33%     | 2.33  | 00:01:18 | 0.00%      | 0 (0.00%) | \$0.00 (0.00%) |
| 854. | SonyEricsson MT15a Xperia Neo          | 3 (0.00%) | 100.00%    | 3 (0.01%) | 100.00%    | 1.00  | 00:00:00 | 0.00%      | 0 (0.00%) | \$0.00 (0.00%) |
| 855. | SonyEricsson ST18a Urushi              | 3 (0.00%) | 100.00%    | 3 (0.01%) | 100.00%    | 1.00  | 00:00:00 | 0.00%      | 0 (0.00%) | \$0.00 (0.00%) |
| 856. | Telstra T-Hub2                         | 3 (0.00%) | 100.00%    | 3 (0.01%) | 33.33%     | 2.33  | 00:00:29 | 0.00%      | 0 (0.00%) | \$0.00 (0.00%) |
| 857. | Xiaomi MI 2SC                          | 3 (0.00%) | 100.00%    | 3 (0.01%) | 33.33%     | 2.33  | 00:00:37 | 0.00%      | 0 (0.00%) | \$0.00 (0.00%) |
| 858. | Xolo A800                              | 3 (0.00%) | 66.67%     | 2 (0.00%) | 66.67%     | 1.33  | 00:00:13 | 0.00%      | 0 (0.00%) | \$0.00 (0.00%) |
| 859. | Zopo ZP980                             | 3 (0.00%) | 33.33%     | 1 (0.00%) | 66.67%     | 1.33  | 00:00:48 | 0.00%      | 0 (0.00%) | \$0.00 (0.00%) |
| 860. | ZTE U795                               | 3 (0.00%) | 33.33%     | 1 (0.00%) | 33.33%     | 5.00  | 00:12:20 | 0.00%      | 0 (0.00%) | \$0.00 (0.00%) |
| 861. | ZTE Z990g Merit                        | 3 (0.00%) | 100.00%    | 3 (0.01%) | 66.67%     | 1.33  | 00:00:05 | 0.00%      | 0 (0.00%) | \$0.00 (0.00%) |
| 862. | 2 Degrees C866C Smart Touch            | 2 (0.00%) | 100.00%    | 2 (0.00%) | 100.00%    | 1.00  | 00:00:00 | 0.00%      | 0 (0.00%) | \$0.00 (0.00%) |
| 863. | Acer A101 Vangogh                      | 2 (0.00%) | 100.00%    | 2 (0.00%) | 100.00%    | 1.00  | 00:00:00 | 0.00%      | 0 (0.00%) | \$0.00 (0.00%) |
| 864. | Acer A510                              | 2 (0.00%) | 100.00%    | 2 (0.00%) | 50.00%     | 1.50  | 00:00:15 | 0.00%      | 0 (0.00%) | \$0.00 (0.00%) |
| 865. | Acer A701                              | 2 (0.00%) | 100.00%    | 2 (0.00%) | 100.00%    | 1.00  | 00:00:00 | 0.00%      | 0 (0.00%) | \$0.00 (0.00%) |
| 866. | Acer E350 Liquid Gallant E350          | 2 (0.00%) | 100.00%    | 2 (0.00%) | 100.00%    | 1.00  | 00:00:00 | 0.00%      | 0 (0.00%) | \$0.00 (0.00%) |
| 867. | Advan Vandroid T                       | 2 (0.00%) | 50.00%     | 1 (0.00%) | 100.00%    | 1.00  | 00:00:00 | 0.00%      | 0 (0.00%) | \$0.00 (0.00%) |
| 868. | Alcatel Evo 7 One Touch Evo 7          | 2 (0.00%) | 100.00%    | 2 (0.00%) | 100.00%    | 1.00  | 00:00:00 | 0.00%      | 0 (0.00%) | \$0.00 (0.00%) |
| 869. | Alcatel One Touch 6033X Idol Ultra     | 2 (0.00%) | 100.00%    | 2 (0.00%) | 100.00%    | 1.00  | 00:00:00 | 0.00%      | 0 (0.00%) | \$0.00 (0.00%) |
| 870. | Alcatel OT-4010> One Touch T'Pop 4010X | 2 (0.00%) | 100.00%    | 2 (0.00%) | 0.00%      | 4.00  | 00:02:01 | 0.00%      | 0 (0.00%) | \$0.00 (0.00%) |
| 871. | Alcatel OT-4033< Pop C3                | 2 (0.00%) | 100.00%    | 2 (0.00%) | 100.00%    | 1.00  | 00:00:00 | 0.00%      | 0 (0.00%) | \$0.00 (0.00%) |
| 872. | Alcatel OT-5020> One Touch M'Pop       | 2 (0.00%) | 100.00%    | 2 (0.00%) | 50.00%     | 1.50  | 00:01:38 | 0.00%      | 0 (0.00%) | \$0.00 (0.00%) |
| 873. | Alcatel OT-5021E One Touch Soleil      | 2 (0.00%) | 100.00%    | 2 (0.00%) | 100.00%    | 1.00  | 00:00:00 | 0.00%      | 0 (0.00%) | \$0.00 (0.00%) |
| 874. | Alcatel OT-5035D One Touch X'Pop 5035D | 2 (0.00%) | 100.00%    | 2 (0.00%) | 50.00%     | 1.50  | 00:00:16 | 0.00%      | 0 (0.00%) | \$0.00 (0.00%) |
| 875. | Alcatel OT-5035> One Touch X'Pop 5035X | 2 (0.00%) | 100.00%    | 2 (0.00%) | 100.00%    | 1.00  | 00:00:00 | 0.00%      | 0 (0.00%) | \$0.00 (0.00%) |
| 876. | Alcatel OT-8000< One Touch Scribe Easy | 2 (0.00%) | 100.00%    | 2 (0.00%) | 0.00%      | 13.50 | 00:24:48 | 0.00%      | 0 (0.00%) | \$0.00 (0.00%) |
| 877. | Alcatel OT-8000D One Touch Scribe Easy | 2 (0.00%) | 50.00%     | 1 (0.00%) | 100.00%    | 1.00  | 00:00:00 | 0.00%      | 0 (0.00%) | \$0.00 (0.00%) |
| 878. | Alcatel OT-903 One Touch 903           | 2 (0.00%) | 100.00%    | 2 (0.00%) | 50.00%     | 2.50  | 00:13:59 | 0.00%      | 0 (0.00%) | \$0.00 (0.00%) |
| 879. | Alcatel OT-918N One Touch 918N         | 2 (0.00%) | 100.00%    | 2 (0.00%) | 100.00%    | 1.00  | 00:00:00 | 0.00%      | 0 (0.00%) | \$0.00 (0.00%) |
| 880. | Alcatel OT-990 One Touch 990           | 2 (0.00%) | 100.00%    | 2 (0.00%) | 100.00%    | 1.00  | 00:00:00 | 0.00%      | 0 (0.00%) | \$0.00 (0.00%) |
| 881. | Alcatel OT-991 One Touch 991           | 2 (0.00%) | 100.00%    | 2 (0.00%) | 100.00%    | 1.00  | 00:00:00 | 0.00%      | 0 (0.00%) | \$0.00 (0.00%) |



|      |                                         |           |         |           |         |      |          |       |           |                |
|------|-----------------------------------------|-----------|---------|-----------|---------|------|----------|-------|-----------|----------------|
| 881. | One Touch 991 Play                      | 2 (0.00%) | 100.00% | 2 (0.00%) | 100.00% | 1.00 | 00:00:00 | 0.00% | 0 (0.00%) | \$0.00 (0.00%) |
| 882. | Alcatel OT-997D One Touch 997D          | 2 (0.00%) | 100.00% | 2 (0.00%) | 100.00% | 1.00 | 00:00:00 | 0.00% | 0 (0.00%) | \$0.00 (0.00%) |
| 883. | Archos 80 G9                            | 2 (0.00%) | 100.00% | 2 (0.00%) | 100.00% | 1.00 | 00:00:00 | 0.00% | 0 (0.00%) | \$0.00 (0.00%) |
| 884. | Asus ASUS-PadFone                       | 2 (0.00%) | 100.00% | 2 (0.00%) | 50.00%  | 2.00 | 00:00:22 | 0.00% | 0 (0.00%) | \$0.00 (0.00%) |
| 885. | Asus TF300G Transformer Pad TF300G      | 2 (0.00%) | 50.00%  | 1 (0.00%) | 100.00% | 1.00 | 00:00:00 | 0.00% | 0 (0.00%) | \$0.00 (0.00%) |
| 886. | BlackBerry 8900 Curve                   | 2 (0.00%) | 100.00% | 2 (0.00%) | 100.00% | 1.00 | 00:00:00 | 0.00% | 0 (0.00%) | \$0.00 (0.00%) |
| 887. | BlackBerry 9100 Pearl 3G                | 2 (0.00%) | 50.00%  | 1 (0.00%) | 100.00% | 1.00 | 00:00:00 | 0.00% | 0 (0.00%) | \$0.00 (0.00%) |
| 888. | BlackBerry 9330 Curve                   | 2 (0.00%) | 100.00% | 2 (0.00%) | 100.00% | 1.00 | 00:00:00 | 0.00% | 0 (0.00%) | \$0.00 (0.00%) |
| 889. | BlackBerry 9670                         | 2 (0.00%) | 100.00% | 2 (0.00%) | 50.00%  | 2.00 | 00:01:20 | 0.00% | 0 (0.00%) | \$0.00 (0.00%) |
| 890. | Casio IS11CA G'z One IS11CA for KDDI au | 2 (0.00%) | 50.00%  | 1 (0.00%) | 100.00% | 1.00 | 00:00:00 | 0.00% | 0 (0.00%) | \$0.00 (0.00%) |
| 891. | Coby MID7048 Kyros MID7048              | 2 (0.00%) | 100.00% | 2 (0.00%) | 100.00% | 1.00 | 00:00:00 | 0.00% | 0 (0.00%) | \$0.00 (0.00%) |
| 892. | Digital2 D2-927G Premier                | 2 (0.00%) | 0.00%   | 0 (0.00%) | 50.00%  | 1.50 | 00:02:05 | 0.00% | 0 (0.00%) | \$0.00 (0.00%) |
| 893. | DoCoMo F-04E Arrows V F-04E             | 2 (0.00%) | 50.00%  | 1 (0.00%) | 100.00% | 1.00 | 00:00:00 | 0.00% | 0 (0.00%) | \$0.00 (0.00%) |
| 894. | DoCoMo L-05D Optimus it                 | 2 (0.00%) | 100.00% | 2 (0.00%) | 100.00% | 1.00 | 00:00:00 | 0.00% | 0 (0.00%) | \$0.00 (0.00%) |
| 895. | DoCoMo SC-06E Galaxy SIII LTE           | 2 (0.00%) | 100.00% | 2 (0.00%) | 50.00%  | 3.00 | 00:02:15 | 0.00% | 0 (0.00%) | \$0.00 (0.00%) |
| 896. | Fujitsu F-01D ARROWS Tab LTE F-01D      | 2 (0.00%) | 100.00% | 2 (0.00%) | 100.00% | 1.00 | 00:00:00 | 0.00% | 0 (0.00%) | \$0.00 (0.00%) |
| 897. | Fujitsu F-05D ARROWS X LTE F-05D        | 2 (0.00%) | 100.00% | 2 (0.00%) | 50.00%  | 5.00 | 00:00:47 | 0.00% | 0 (0.00%) | \$0.00 (0.00%) |
| 898. | Garmin-Asus A1C                         | 2 (0.00%) | 50.00%  | 1 (0.00%) | 50.00%  | 1.50 | 00:03:02 | 0.00% | 0 (0.00%) | \$0.00 (0.00%) |
| 899. | HCL U1 ME U1                            | 2 (0.00%) | 100.00% | 2 (0.00%) | 0.00%   | 2.00 | 00:04:58 | 0.00% | 0 (0.00%) | \$0.00 (0.00%) |
| 900. | HTC A02 INFOBAR A02 for KDDI            | 2 (0.00%) | 100.00% | 2 (0.00%) | 50.00%  | 4.00 | 00:00:25 | 0.00% | 0 (0.00%) | \$0.00 (0.00%) |
| 901. | HTC A620t 8S                            | 2 (0.00%) | 100.00% | 2 (0.00%) | 100.00% | 1.00 | 00:00:00 | 0.00% | 0 (0.00%) | \$0.00 (0.00%) |
| 902. | HTC Corporation PJ83100 One X           | 2 (0.00%) | 100.00% | 2 (0.00%) | 100.00% | 1.00 | 00:00:00 | 0.00% | 0 (0.00%) | \$0.00 (0.00%) |
| 903. | HTC Desire X0H6T                        | 2 (0.00%) | 100.00% | 2 (0.00%) | 50.00%  | 2.00 | 00:00:45 | 0.00% | 0 (0.00%) | \$0.00 (0.00%) |
| 904. | HTC HD2                                 | 2 (0.00%) | 100.00% | 2 (0.00%) | 100.00% | 1.00 | 00:00:00 | 0.00% | 0 (0.00%) | \$0.00 (0.00%) |
| 905. | HTC HTC6500LVW One                      | 2 (0.00%) | 100.00% | 2 (0.00%) | 0.00%   | 6.00 | 00:00:45 | 0.00% | 0 (0.00%) | \$0.00 (0.00%) |
| 906. | HTC HTL21 Butterfly                     | 2 (0.00%) | 100.00% | 2 (0.00%) | 100.00% | 1.00 | 00:00:00 | 0.00% | 0 (0.00%) | \$0.00 (0.00%) |
| 907. | HTC PC36100 EVO 4G                      | 2 (0.00%) | 100.00% | 2 (0.00%) | 100.00% | 1.00 | 00:00:00 | 0.00% | 0 (0.00%) | \$0.00 (0.00%) |
| 908. | HTC PM63100 One X+                      | 2 (0.00%) | 50.00%  | 1 (0.00%) | 100.00% | 1.00 | 00:00:00 | 0.00% | 0 (0.00%) | \$0.00 (0.00%) |
| 909. | HTC Radar 4G                            | 2 (0.00%) | 100.00% | 2 (0.00%) | 100.00% | 1.00 | 00:00:00 | 0.00% | 0 (0.00%) | \$0.00 (0.00%) |
| 910. | HTC Salsa                               | 2 (0.00%) | 100.00% | 2 (0.00%) | 100.00% | 1.00 | 00:00:00 | 0.00% | 0 (0.00%) | \$0.00 (0.00%) |

|      |                                  |           |         |           |         |      |          |       |           |                |
|------|----------------------------------|-----------|---------|-----------|---------|------|----------|-------|-----------|----------------|
| 911. | HTC V1 Me V1                     | 2 (0.00%) | 100.00% | 2 (0.00%) | 50.00%  | 1.50 | 00:00:16 | 0.00% | 0 (0.00%) | \$0.00 (0.00%) |
| 912. | HTC Vision                       | 2 (0.00%) | 100.00% | 2 (0.00%) | 100.00% | 1.00 | 00:00:00 | 0.00% | 0 (0.00%) | \$0.00 (0.00%) |
| 913. | HTC Z710a Sensation              | 2 (0.00%) | 50.00%  | 1 (0.00%) | 50.00%  | 3.00 | 00:00:17 | 0.00% | 0 (0.00%) | \$0.00 (0.00%) |
| 914. | Huawei G525-U00 Ascend G525-U00  | 2 (0.00%) | 100.00% | 2 (0.00%) | 100.00% | 1.00 | 00:00:00 | 0.00% | 0 (0.00%) | \$0.00 (0.00%) |
| 915. | Huawei G610-U00                  | 2 (0.00%) | 100.00% | 2 (0.00%) | 50.00%  | 7.50 | 00:21:55 | 0.00% | 0 (0.00%) | \$0.00 (0.00%) |
| 916. | Huawei G700-U10 Ascend G700      | 2 (0.00%) | 100.00% | 2 (0.00%) | 100.00% | 1.00 | 00:00:00 | 0.00% | 0 (0.00%) | \$0.00 (0.00%) |
| 917. | Huawei G730-U00 Ascend G730      | 2 (0.00%) | 100.00% | 2 (0.00%) | 50.00%  | 3.00 | 00:01:00 | 0.00% | 0 (0.00%) | \$0.00 (0.00%) |
| 918. | Huawei H866C Ascend Y H866C      | 2 (0.00%) | 100.00% | 2 (0.00%) | 50.00%  | 1.50 | 00:00:30 | 0.00% | 0 (0.00%) | \$0.00 (0.00%) |
| 919. | Huawei HUAWEI Y210-0200 Ascend   | 2 (0.00%) | 50.00%  | 1 (0.00%) | 100.00% | 1.00 | 00:00:00 | 0.00% | 0 (0.00%) | \$0.00 (0.00%) |
| 920. | Huawei U8100 Tactile Internet    | 2 (0.00%) | 100.00% | 2 (0.00%) | 50.00%  | 1.50 | 00:00:22 | 0.00% | 0 (0.00%) | \$0.00 (0.00%) |
| 921. | Huawei U8180                     | 2 (0.00%) | 100.00% | 2 (0.00%) | 50.00%  | 2.00 | 00:02:21 | 0.00% | 0 (0.00%) | \$0.00 (0.00%) |
| 922. | Huawei U8666E-51 Ascend Y201 Pro | 2 (0.00%) | 100.00% | 2 (0.00%) | 100.00% | 1.00 | 00:00:00 | 0.00% | 0 (0.00%) | \$0.00 (0.00%) |
| 923. | Huawei U8820 Titan               | 2 (0.00%) | 100.00% | 2 (0.00%) | 50.00%  | 3.50 | 00:01:07 | 0.00% | 0 (0.00%) | \$0.00 (0.00%) |
| 924. | Huawei U8825-1 Ascend G330       | 2 (0.00%) | 100.00% | 2 (0.00%) | 100.00% | 1.00 | 00:00:00 | 0.00% | 0 (0.00%) | \$0.00 (0.00%) |
| 925. | Huawei U8950D Ascend G600        | 2 (0.00%) | 100.00% | 2 (0.00%) | 50.00%  | 2.00 | 00:00:52 | 0.00% | 0 (0.00%) | \$0.00 (0.00%) |
| 926. | Idea AURUS III                   | 2 (0.00%) | 50.00%  | 1 (0.00%) | 50.00%  | 4.00 | 00:01:44 | 0.00% | 0 (0.00%) | \$0.00 (0.00%) |
| 927. | Jiayu JY-G3                      | 2 (0.00%) | 100.00% | 2 (0.00%) | 100.00% | 1.00 | 00:00:00 | 0.00% | 0 (0.00%) | \$0.00 (0.00%) |
| 928. | Karbons A15                      | 2 (0.00%) | 100.00% | 2 (0.00%) | 100.00% | 1.00 | 00:00:00 | 0.00% | 0 (0.00%) | \$0.00 (0.00%) |
| 929. | Karbons A4+                      | 2 (0.00%) | 100.00% | 2 (0.00%) | 50.00%  | 1.50 | 00:00:13 | 0.00% | 0 (0.00%) | \$0.00 (0.00%) |
| 930. | Karbons A6                       | 2 (0.00%) | 100.00% | 2 (0.00%) | 50.00%  | 2.50 | 00:00:52 | 0.00% | 0 (0.00%) | \$0.00 (0.00%) |
| 931. | Karbons A7 A7 Star               | 2 (0.00%) | 50.00%  | 1 (0.00%) | 50.00%  | 2.00 | 00:00:23 | 0.00% | 0 (0.00%) | \$0.00 (0.00%) |
| 932. | KDDI SOL22 Xperia UL             | 2 (0.00%) | 100.00% | 2 (0.00%) | 100.00% | 1.00 | 00:00:00 | 0.00% | 0 (0.00%) | \$0.00 (0.00%) |
| 933. | Kobo Touch Touch eReader         | 2 (0.00%) | 100.00% | 2 (0.00%) | 100.00% | 1.00 | 00:00:00 | 0.00% | 0 (0.00%) | \$0.00 (0.00%) |
| 934. | Kyocera C5171 Hydro              | 2 (0.00%) | 100.00% | 2 (0.00%) | 0.00%   | 7.00 | 00:14:31 | 0.00% | 0 (0.00%) | \$0.00 (0.00%) |
| 935. | Lanix S105 Ilium                 | 2 (0.00%) | 100.00% | 2 (0.00%) | 0.00%   | 4.00 | 00:02:38 | 0.00% | 0 (0.00%) | \$0.00 (0.00%) |
| 936. | Lenovo B6000-H Yoga B6000-H      | 2 (0.00%) | 50.00%  | 1 (0.00%) | 100.00% | 1.00 | 00:00:00 | 0.00% | 0 (0.00%) | \$0.00 (0.00%) |
| 937. | Lenovo K1                        | 2 (0.00%) | 100.00% | 2 (0.00%) | 50.00%  | 1.50 | 00:10:25 | 0.00% | 0 (0.00%) | \$0.00 (0.00%) |
| 938. | Lenovo S880                      | 2 (0.00%) | 100.00% | 2 (0.00%) | 100.00% | 1.00 | 00:00:00 | 0.00% | 0 (0.00%) | \$0.00 (0.00%) |
| 939. | LG C900 Quantum                  | 2 (0.00%) | 100.00% | 2 (0.00%) | 100.00% | 1.00 | 00:00:00 | 0.00% | 0 (0.00%) | \$0.00 (0.00%) |
| 940. | LG E400R Optimus L3              | 2 (0.00%) | 100.00% | 2 (0.00%) | 100.00% | 1.00 | 00:00:00 | 0.00% | 0 (0.00%) | \$0.00 (0.00%) |
| 941. | LG E440 Optimus L4 II            | 2 (0.00%) | 100.00% | 2 (0.00%) | 100.00% | 1.00 | 00:00:00 | 0.00% | 0 (0.00%) | \$0.00 (0.00%) |
| 942. | LG E455f                         | 2 (0.00%) | 100.00% | 2 (0.00%) | 50.00%  | 3.50 | 00:06:24 | 0.00% | 0 (0.00%) | \$0.00 (0.00%) |

| Optimus L5 II |                                  | Count     | Percentage | Count     | Percentage | Price | Time     | Percentage | Count     | Price          |
|---------------|----------------------------------|-----------|------------|-----------|------------|-------|----------|------------|-----------|----------------|
| 943.          | LG E510g Optimus Hub             | 2 (0.00%) | 100.00%    | 2 (0.00%) | 50.00%     | 1.50  | 00:01:09 | 0.00%      | 0 (0.00%) | \$0.00 (0.00%) |
| 944.          | LG E976 Optimus G                | 2 (0.00%) | 50.00%     | 1 (0.00%) | 50.00%     | 6.00  | 00:02:22 | 0.00%      | 0 (0.00%) | \$0.00 (0.00%) |
| 945.          | LG E988 Optimus G Pro            | 2 (0.00%) | 100.00%    | 2 (0.00%) | 50.00%     | 2.00  | 00:00:18 | 0.00%      | 0 (0.00%) | \$0.00 (0.00%) |
| 946.          | LG F120K Optimus LTE TAG         | 2 (0.00%) | 50.00%     | 1 (0.00%) | 50.00%     | 2.00  | 00:00:49 | 0.00%      | 0 (0.00%) | \$0.00 (0.00%) |
| 947.          | LG F180L Optimus G               | 2 (0.00%) | 100.00%    | 2 (0.00%) | 50.00%     | 1.50  | 00:00:23 | 0.00%      | 0 (0.00%) | \$0.00 (0.00%) |
| 948.          | LG F240S Optimus G Pro           | 2 (0.00%) | 100.00%    | 2 (0.00%) | 100.00%    | 1.00  | 00:00:00 | 0.00%      | 0 (0.00%) | \$0.00 (0.00%) |
| 949.          | LG F260S Optimus LTE III         | 2 (0.00%) | 100.00%    | 2 (0.00%) | 100.00%    | 1.00  | 00:00:00 | 0.00%      | 0 (0.00%) | \$0.00 (0.00%) |
| 950.          | LG GM360                         | 2 (0.00%) | 100.00%    | 2 (0.00%) | 50.00%     | 1.50  | 00:00:12 | 0.00%      | 0 (0.00%) | \$0.00 (0.00%) |
| 951.          | LG GT540 GT540 Optimus           | 2 (0.00%) | 100.00%    | 2 (0.00%) | 100.00%    | 1.00  | 00:00:00 | 0.00%      | 0 (0.00%) | \$0.00 (0.00%) |
| 952.          | LG KP500                         | 2 (0.00%) | 100.00%    | 2 (0.00%) | 100.00%    | 1.00  | 00:00:00 | 0.00%      | 0 (0.00%) | \$0.00 (0.00%) |
| 953.          | LG L55c Optimus Q                | 2 (0.00%) | 50.00%     | 1 (0.00%) | 100.00%    | 1.00  | 00:00:00 | 0.00%      | 0 (0.00%) | \$0.00 (0.00%) |
| 954.          | LG LG855 Marquee                 | 2 (0.00%) | 100.00%    | 2 (0.00%) | 50.00%     | 2.50  | 00:00:52 | 0.00%      | 0 (0.00%) | \$0.00 (0.00%) |
| 955.          | LG LS970 Optimus G               | 2 (0.00%) | 100.00%    | 2 (0.00%) | 100.00%    | 1.00  | 00:00:00 | 0.00%      | 0 (0.00%) | \$0.00 (0.00%) |
| 956.          | LG MS690 Optimus M               | 2 (0.00%) | 100.00%    | 2 (0.00%) | 100.00%    | 1.00  | 00:00:00 | 0.00%      | 0 (0.00%) | \$0.00 (0.00%) |
| 957.          | LG MS695 Optimus M+              | 2 (0.00%) | 100.00%    | 2 (0.00%) | 100.00%    | 1.00  | 00:00:00 | 0.00%      | 0 (0.00%) | \$0.00 (0.00%) |
| 958.          | LG P500 Optimus One              | 2 (0.00%) | 50.00%     | 1 (0.00%) | 50.00%     | 3.00  | 00:03:24 | 0.00%      | 0 (0.00%) | \$0.00 (0.00%) |
| 959.          | LG P509 Optimus T                | 2 (0.00%) | 100.00%    | 2 (0.00%) | 50.00%     | 4.50  | 00:01:13 | 0.00%      | 0 (0.00%) | \$0.00 (0.00%) |
| 960.          | LG P708g Optimus L7              | 2 (0.00%) | 100.00%    | 2 (0.00%) | 50.00%     | 2.00  | 00:00:26 | 0.00%      | 0 (0.00%) | \$0.00 (0.00%) |
| 961.          | LG P710 Optimus L7 II            | 2 (0.00%) | 100.00%    | 2 (0.00%) | 50.00%     | 3.50  | 00:01:37 | 0.00%      | 0 (0.00%) | \$0.00 (0.00%) |
| 962.          | LG P715 Optimus L7 II Dual       | 2 (0.00%) | 100.00%    | 2 (0.00%) | 50.00%     | 1.50  | 00:03:02 | 0.00%      | 0 (0.00%) | \$0.00 (0.00%) |
| 963.          | LG P930 Optimus LTE              | 2 (0.00%) | 100.00%    | 2 (0.00%) | 100.00%    | 1.00  | 00:00:00 | 0.00%      | 0 (0.00%) | \$0.00 (0.00%) |
| 964.          | LG SU760 Optimus 3D              | 2 (0.00%) | 100.00%    | 2 (0.00%) | 0.00%      | 13.00 | 00:02:42 | 0.00%      | 0 (0.00%) | \$0.00 (0.00%) |
| 965.          | LG V909 G Slate                  | 2 (0.00%) | 100.00%    | 2 (0.00%) | 50.00%     | 1.50  | 00:03:49 | 0.00%      | 0 (0.00%) | \$0.00 (0.00%) |
| 966.          | LG VS930 Spectrum 2              | 2 (0.00%) | 100.00%    | 2 (0.00%) | 100.00%    | 1.00  | 00:00:00 | 0.00%      | 0 (0.00%) | \$0.00 (0.00%) |
| 967.          | Medion E10312 (MD 98486) Lifetab | 2 (0.00%) | 0.00%      | 0 (0.00%) | 0.00%      | 3.50  | 00:02:51 | 0.00%      | 0 (0.00%) | \$0.00 (0.00%) |
| 968.          | Medion MD 98172 Life E3501       | 2 (0.00%) | 100.00%    | 2 (0.00%) | 50.00%     | 12.50 | 00:03:28 | 0.00%      | 0 (0.00%) | \$0.00 (0.00%) |
| 969.          | Meizu M040 MX2                   | 2 (0.00%) | 100.00%    | 2 (0.00%) | 100.00%    | 1.00  | 00:00:00 | 0.00%      | 0 (0.00%) | \$0.00 (0.00%) |
| 970.          | Meizu M9                         | 2 (0.00%) | 100.00%    | 2 (0.00%) | 100.00%    | 1.00  | 00:00:00 | 0.00%      | 0 (0.00%) | \$0.00 (0.00%) |
| 971.          | Micromax A26 A26 Bolt            | 2 (0.00%) | 100.00%    | 2 (0.00%) | 50.00%     | 1.50  | 00:00:06 | 0.00%      | 0 (0.00%) | \$0.00 (0.00%) |
| 972.          | Micromax A72 A72 Canvas Viva     | 2 (0.00%) | 100.00%    | 2 (0.00%) | 50.00%     | 2.00  | 00:01:10 | 0.00%      | 0 (0.00%) | \$0.00 (0.00%) |



|       |                                           |           |         |           |         |      |          |       |           |                |
|-------|-------------------------------------------|-----------|---------|-----------|---------|------|----------|-------|-----------|----------------|
| 1006. | Panasonic U03P Sweety 003P for Softbank   | 2 (0.00%) | 50.00%  | 1 (0.00%) | 100.00% | 1.00 | 00:00:00 | 0.00% | 0 (0.00%) | \$0.00 (0.00%) |
| 1007. | Pandigital SuperNova                      | 2 (0.00%) | 100.00% | 2 (0.00%) | 50.00%  | 2.00 | 00:00:22 | 0.00% | 0 (0.00%) | \$0.00 (0.00%) |
| 1008. | Pantech IM-A820L Vega LTE EX              | 2 (0.00%) | 100.00% | 2 (0.00%) | 100.00% | 1.00 | 00:00:00 | 0.00% | 0 (0.00%) | \$0.00 (0.00%) |
| 1009. | Pantech IM-A850L Vega R3                  | 2 (0.00%) | 100.00% | 2 (0.00%) | 100.00% | 1.00 | 00:00:00 | 0.00% | 0 (0.00%) | \$0.00 (0.00%) |
| 1010. | Pantech IM-T100K Vega No 5                | 2 (0.00%) | 100.00% | 2 (0.00%) | 50.00%  | 5.00 | 00:01:37 | 0.00% | 0 (0.00%) | \$0.00 (0.00%) |
| 1011. | Philips W732                              | 2 (0.00%) | 100.00% | 2 (0.00%) | 100.00% | 1.00 | 00:00:00 | 0.00% | 0 (0.00%) | \$0.00 (0.00%) |
| 1012. | Samsung GT i7500 Galaxy                   | 2 (0.00%) | 100.00% | 2 (0.00%) | 0.00%   | 9.00 | 00:14:12 | 0.00% | 0 (0.00%) | \$0.00 (0.00%) |
| 1013. | Samsung GT-B7510L Galaxy Pro              | 2 (0.00%) | 50.00%  | 1 (0.00%) | 50.00%  | 4.00 | 00:03:47 | 0.00% | 0 (0.00%) | \$0.00 (0.00%) |
| 1014. | Samsung GT-C3303                          | 2 (0.00%) | 100.00% | 2 (0.00%) | 100.00% | 1.00 | 00:00:00 | 0.00% | 0 (0.00%) | \$0.00 (0.00%) |
| 1015. | Samsung GT-C3322 Metro Duos               | 2 (0.00%) | 100.00% | 2 (0.00%) | 50.00%  | 1.50 | 00:00:01 | 0.00% | 0 (0.00%) | \$0.00 (0.00%) |
| 1016. | Samsung GT-E1130B                         | 2 (0.00%) | 50.00%  | 1 (0.00%) | 0.00%   | 3.00 | 00:01:04 | 0.00% | 0 (0.00%) | \$0.00 (0.00%) |
| 1017. | Samsung GT-E1390                          | 2 (0.00%) | 100.00% | 2 (0.00%) | 50.00%  | 2.50 | 00:07:53 | 0.00% | 0 (0.00%) | \$0.00 (0.00%) |
| 1018. | Samsung GT-E3309 Manhattan                | 2 (0.00%) | 100.00% | 2 (0.00%) | 50.00%  | 2.50 | 00:03:32 | 0.00% | 0 (0.00%) | \$0.00 (0.00%) |
| 1019. | Samsung GT-I5800 Galaxy 3 Apollo          | 2 (0.00%) | 100.00% | 2 (0.00%) | 100.00% | 1.00 | 00:00:00 | 0.00% | 0 (0.00%) | \$0.00 (0.00%) |
| 1020. | Samsung GT-N7108 Galaxy Note II           | 2 (0.00%) | 100.00% | 2 (0.00%) | 100.00% | 1.00 | 00:00:00 | 0.00% | 0 (0.00%) | \$0.00 (0.00%) |
| 1021. | Samsung GT-P7320 Galaxy Tab 8.9 LTE       | 2 (0.00%) | 100.00% | 2 (0.00%) | 100.00% | 1.00 | 00:00:00 | 0.00% | 0 (0.00%) | \$0.00 (0.00%) |
| 1022. | Samsung GT-P7511 Galaxy Tab 10.1          | 2 (0.00%) | 100.00% | 2 (0.00%) | 100.00% | 1.00 | 00:00:00 | 0.00% | 0 (0.00%) | \$0.00 (0.00%) |
| 1023. | Samsung GT-S5300L Galaxy Pocket           | 2 (0.00%) | 100.00% | 2 (0.00%) | 50.00%  | 8.00 | 00:11:08 | 0.00% | 0 (0.00%) | \$0.00 (0.00%) |
| 1024. | Samsung GT-S5333 Samsung Wave 533         | 2 (0.00%) | 100.00% | 2 (0.00%) | 100.00% | 1.00 | 00:00:00 | 0.00% | 0 (0.00%) | \$0.00 (0.00%) |
| 1025. | Samsung GT-S5570B                         | 2 (0.00%) | 100.00% | 2 (0.00%) | 50.00%  | 3.50 | 00:02:59 | 0.00% | 0 (0.00%) | \$0.00 (0.00%) |
| 1026. | Samsung GT-S5750E                         | 2 (0.00%) | 50.00%  | 1 (0.00%) | 50.00%  | 1.50 | 00:00:33 | 0.00% | 0 (0.00%) | \$0.00 (0.00%) |
| 1027. | Samsung GT-S5830C Galaxy Ace              | 2 (0.00%) | 100.00% | 2 (0.00%) | 100.00% | 1.00 | 00:00:00 | 0.00% | 0 (0.00%) | \$0.00 (0.00%) |
| 1028. | Samsung GT-S7572 Galaxy Trend II Duos     | 2 (0.00%) | 100.00% | 2 (0.00%) | 50.00%  | 1.50 | 00:00:03 | 0.00% | 0 (0.00%) | \$0.00 (0.00%) |
| 1029. | Samsung SC-02B Galaxy S SC-02B for DoCoMo | 2 (0.00%) | 100.00% | 2 (0.00%) | 100.00% | 1.00 | 00:00:00 | 0.00% | 0 (0.00%) | \$0.00 (0.00%) |
| 1030. | Samsung SC-03D GALAXY S II LTE SC-03D for | 2 (0.00%) | 100.00% | 2 (0.00%) | 100.00% | 1.00 | 00:00:00 | 0.00% | 0 (0.00%) | \$0.00 (0.00%) |



|       |                                                 |           |         |           |         |       |          |       |           |                |
|-------|-------------------------------------------------|-----------|---------|-----------|---------|-------|----------|-------|-----------|----------------|
| 1053. | S5                                              | 2 (0.00%) | 100.00% | 2 (0.00%) | 100.00% | 1.00  | 00:00:00 | 0.00% | 0 (0.00%) | \$0.00 (0.00%) |
| 1054. | Samsung SPH-930 Transform Ultra                 | 2 (0.00%) | 100.00% | 2 (0.00%) | 100.00% | 1.00  | 00:00:00 | 0.00% | 0 (0.00%) | \$0.00 (0.00%) |
| 1055. | Samsung SPH-P500 Galaxy Tab 2 10.1              | 2 (0.00%) | 100.00% | 2 (0.00%) | 50.00%  | 2.00  | 00:00:29 | 0.00% | 0 (0.00%) | \$0.00 (0.00%) |
| 1056. | Sharp 005SH Sharp Galapagos 005SH for SoftBank  | 2 (0.00%) | 50.00%  | 1 (0.00%) | 0.00%   | 45.00 | 00:31:29 | 0.00% | 0 (0.00%) | \$0.00 (0.00%) |
| 1057. | Sharp SH-03C LYNX 3D SH-03C for DoCoMo          | 2 (0.00%) | 50.00%  | 1 (0.00%) | 100.00% | 1.00  | 00:00:00 | 0.00% | 0 (0.00%) | \$0.00 (0.00%) |
| 1058. | Sharp SHL23 AQUOS PHONE SERIE SHL23 for KDDI    | 2 (0.00%) | 50.00%  | 1 (0.00%) | 50.00%  | 2.00  | 00:00:10 | 0.00% | 0 (0.00%) | \$0.00 (0.00%) |
| 1059. | Smartfren AD683G Andromax-i AD683G              | 2 (0.00%) | 50.00%  | 1 (0.00%) | 50.00%  | 3.50  | 00:01:21 | 0.00% | 0 (0.00%) | \$0.00 (0.00%) |
| 1060. | Smartfren E860 Hisense E860                     | 2 (0.00%) | 50.00%  | 1 (0.00%) | 50.00%  | 4.00  | 00:01:28 | 0.00% | 0 (0.00%) | \$0.00 (0.00%) |
| 1061. | Sony C5306 Xperia SP LTE                        | 2 (0.00%) | 100.00% | 2 (0.00%) | 50.00%  | 3.00  | 00:00:21 | 0.00% | 0 (0.00%) | \$0.00 (0.00%) |
| 1062. | Sony C5502 Xperia ZR                            | 2 (0.00%) | 100.00% | 2 (0.00%) | 100.00% | 1.00  | 00:00:00 | 0.00% | 0 (0.00%) | \$0.00 (0.00%) |
| 1063. | Sony C6802 Xperia Z Ultra                       | 2 (0.00%) | 100.00% | 2 (0.00%) | 100.00% | 1.00  | 00:00:00 | 0.00% | 0 (0.00%) | \$0.00 (0.00%) |
| 1064. | Sony C6943 Xperia Z1                            | 2 (0.00%) | 50.00%  | 1 (0.00%) | 50.00%  | 6.00  | 00:05:11 | 0.00% | 0 (0.00%) | \$0.00 (0.00%) |
| 1065. | Sony D5503 Xperia Z1s                           | 2 (0.00%) | 100.00% | 2 (0.00%) | 100.00% | 1.00  | 00:00:00 | 0.00% | 0 (0.00%) | \$0.00 (0.00%) |
| 1066. | Sony LT29i Xperia GX                            | 2 (0.00%) | 100.00% | 2 (0.00%) | 100.00% | 1.00  | 00:00:00 | 0.00% | 0 (0.00%) | \$0.00 (0.00%) |
| 1067. | Sony LT30a Xperia TL                            | 2 (0.00%) | 100.00% | 2 (0.00%) | 100.00% | 1.00  | 00:00:00 | 0.00% | 0 (0.00%) | \$0.00 (0.00%) |
| 1068. | Sony PlayStation Vita                           | 2 (0.00%) | 100.00% | 2 (0.00%) | 50.00%  | 1.50  | 00:03:29 | 0.00% | 0 (0.00%) | \$0.00 (0.00%) |
| 1069. | Sony SO-02E Xperia Z SO-02E for DoCoMo          | 2 (0.00%) | 100.00% | 2 (0.00%) | 100.00% | 1.00  | 00:00:00 | 0.00% | 0 (0.00%) | \$0.00 (0.00%) |
| 1070. | SonyEricsson E10i Xperia X10 Mini               | 2 (0.00%) | 100.00% | 2 (0.00%) | 50.00%  | 1.50  | 00:00:43 | 0.00% | 0 (0.00%) | \$0.00 (0.00%) |
| 1071. | SonyEricsson J105i                              | 2 (0.00%) | 100.00% | 2 (0.00%) | 50.00%  | 1.50  | 00:00:43 | 0.00% | 0 (0.00%) | \$0.00 (0.00%) |
| 1072. | SonyEricsson LT15i Xperia arc SO-01C for DoCoMo | 2 (0.00%) | 100.00% | 2 (0.00%) | 50.00%  | 1.50  | 00:00:21 | 0.00% | 0 (0.00%) | \$0.00 (0.00%) |
| 1073. | SonyEricsson LT18a Xperia Arc                   | 2 (0.00%) | 100.00% | 2 (0.00%) | 100.00% | 1.00  | 00:00:00 | 0.00% | 0 (0.00%) | \$0.00 (0.00%) |
| 1074. | SonyEricsson SK17i-o Xperia Mini Pro            | 2 (0.00%) | 50.00%  | 1 (0.00%) | 50.00%  | 2.00  | 00:00:18 | 0.00% | 0 (0.00%) | \$0.00 (0.00%) |
| 1075. | SonyEricsson SO-03C Xperiaray SO-03C for DoCoMo | 2 (0.00%) | 50.00%  | 1 (0.00%) | 50.00%  | 2.50  | 00:04:27 | 0.00% | 0 (0.00%) | \$0.00 (0.00%) |
| 1076. | SonyEricsson ST15a Xperia Mini                  | 2 (0.00%) | 100.00% | 2 (0.00%) | 50.00%  | 2.00  | 00:01:38 | 0.00% | 0 (0.00%) | \$0.00 (0.00%) |





|       |                                       |           |         |           |         |       |          |       |           |                |
|-------|---------------------------------------|-----------|---------|-----------|---------|-------|----------|-------|-----------|----------------|
| 1108. | Asus ME302KL MeMO Pad FHD 10          | 1 (0.00%) | 100.00% | 1 (0.00%) | 100.00% | 1.00  | 00:00:00 | 0.00% | 0 (0.00%) | \$0.00 (0.00%) |
| 1109. | Asus Memo pad ME102 K00F              | 1 (0.00%) | 100.00% | 1 (0.00%) | 100.00% | 1.00  | 00:00:00 | 0.00% | 0 (0.00%) | \$0.00 (0.00%) |
| 1110. | Asus Padfone Infinity                 | 1 (0.00%) | 100.00% | 1 (0.00%) | 0.00%   | 3.00  | 00:00:28 | 0.00% | 0 (0.00%) | \$0.00 (0.00%) |
| 1111. | BBK Vivo X1                           | 1 (0.00%) | 100.00% | 1 (0.00%) | 100.00% | 1.00  | 00:00:00 | 0.00% | 0 (0.00%) | \$0.00 (0.00%) |
| 1112. | Bellefonte A10                        | 1 (0.00%) | 100.00% | 1 (0.00%) | 0.00%   | 3.00  | 00:01:34 | 0.00% | 0 (0.00%) | \$0.00 (0.00%) |
| 1113. | BlackBerry 5233                       | 1 (0.00%) | 100.00% | 1 (0.00%) | 100.00% | 1.00  | 00:00:00 | 0.00% | 0 (0.00%) | \$0.00 (0.00%) |
| 1114. | BlackBerry 9310 Curve 9310            | 1 (0.00%) | 100.00% | 1 (0.00%) | 0.00%   | 2.00  | 00:00:15 | 0.00% | 0 (0.00%) | \$0.00 (0.00%) |
| 1115. | BlackBerry 9370 BlackBerry Curve 9370 | 1 (0.00%) | 100.00% | 1 (0.00%) | 100.00% | 1.00  | 00:00:00 | 0.00% | 0 (0.00%) | \$0.00 (0.00%) |
| 1116. | BlackBerry 9520 Storm II              | 1 (0.00%) | 100.00% | 1 (0.00%) | 100.00% | 1.00  | 00:00:00 | 0.00% | 0 (0.00%) | \$0.00 (0.00%) |
| 1117. | BlackBerry 9850 Volt                  | 1 (0.00%) | 100.00% | 1 (0.00%) | 100.00% | 1.00  | 00:00:00 | 0.00% | 0 (0.00%) | \$0.00 (0.00%) |
| 1118. | BlackBerry 9981 Porsche Design P'9981 | 1 (0.00%) | 100.00% | 1 (0.00%) | 100.00% | 1.00  | 00:00:00 | 0.00% | 0 (0.00%) | \$0.00 (0.00%) |
| 1119. | Blu Dash 3.5                          | 1 (0.00%) | 100.00% | 1 (0.00%) | 100.00% | 1.00  | 00:00:00 | 0.00% | 0 (0.00%) | \$0.00 (0.00%) |
| 1120. | Blue Boxing L8301                     | 1 (0.00%) | 100.00% | 1 (0.00%) | 100.00% | 1.00  | 00:00:00 | 0.00% | 0 (0.00%) | \$0.00 (0.00%) |
| 1121. | BP I9300                              | 1 (0.00%) | 100.00% | 1 (0.00%) | 0.00%   | 6.00  | 00:03:42 | 0.00% | 0 (0.00%) | \$0.00 (0.00%) |
| 1122. | BQ M803 Kepler                        | 1 (0.00%) | 100.00% | 1 (0.00%) | 100.00% | 1.00  | 00:00:00 | 0.00% | 0 (0.00%) | \$0.00 (0.00%) |
| 1123. | Casio C811 4G G'zOne Commando 4G LTE  | 1 (0.00%) | 100.00% | 1 (0.00%) | 0.00%   | 14.00 | 00:11:56 | 0.00% | 0 (0.00%) | \$0.00 (0.00%) |
| 1124. | Celkon A89                            | 1 (0.00%) | 100.00% | 1 (0.00%) | 100.00% | 1.00  | 00:00:00 | 0.00% | 0 (0.00%) | \$0.00 (0.00%) |
| 1125. | Coby MID1042 Kyros MID1042            | 1 (0.00%) | 100.00% | 1 (0.00%) | 100.00% | 1.00  | 00:00:00 | 0.00% | 0 (0.00%) | \$0.00 (0.00%) |
| 1126. | Coby MID7033 Kyros 7033               | 1 (0.00%) | 100.00% | 1 (0.00%) | 100.00% | 1.00  | 00:00:00 | 0.00% | 0 (0.00%) | \$0.00 (0.00%) |
| 1127. | Coby MID7034 Kyros MID7034            | 1 (0.00%) | 100.00% | 1 (0.00%) | 100.00% | 1.00  | 00:00:00 | 0.00% | 0 (0.00%) | \$0.00 (0.00%) |
| 1128. | Coby MID7042 Kyros MID7042            | 1 (0.00%) | 100.00% | 1 (0.00%) | 100.00% | 1.00  | 00:00:00 | 0.00% | 0 (0.00%) | \$0.00 (0.00%) |
| 1129. | Coby MID7065 Kyros MID7065            | 1 (0.00%) | 100.00% | 1 (0.00%) | 100.00% | 1.00  | 00:00:00 | 0.00% | 0 (0.00%) | \$0.00 (0.00%) |
| 1130. | Coby MID8024 Kyros MID8024            | 1 (0.00%) | 100.00% | 1 (0.00%) | 100.00% | 1.00  | 00:00:00 | 0.00% | 0 (0.00%) | \$0.00 (0.00%) |
| 1131. | Coby MID8127 Kyros MID8127            | 1 (0.00%) | 100.00% | 1 (0.00%) | 100.00% | 1.00  | 00:00:00 | 0.00% | 0 (0.00%) | \$0.00 (0.00%) |
| 1132. | Coby MID9742 Kyros MID9742            | 1 (0.00%) | 100.00% | 1 (0.00%) | 0.00%   | 2.00  | 00:01:49 | 0.00% | 0 (0.00%) | \$0.00 (0.00%) |
| 1133. | Coolpad 5216                          | 1 (0.00%) | 100.00% | 1 (0.00%) | 100.00% | 1.00  | 00:00:00 | 0.00% | 0 (0.00%) | \$0.00 (0.00%) |
| 1134. | Coolpad 7295+                         | 1 (0.00%) | 100.00% | 1 (0.00%) | 100.00% | 1.00  | 00:00:00 | 0.00% | 0 (0.00%) | \$0.00 (0.00%) |
| 1135. | Coolpad 8150                          | 1 (0.00%) | 100.00% | 1 (0.00%) | 100.00% | 1.00  | 00:00:00 | 0.00% | 0 (0.00%) | \$0.00 (0.00%) |
| 1136. | Dell Streak 7                         | 1 (0.00%) | 100.00% | 1 (0.00%) | 0.00%   | 3.00  | 00:00:28 | 0.00% | 0 (0.00%) | \$0.00 (0.00%) |
| 1137. | Dell Venue                            | 1 (0.00%) | 100.00% | 1 (0.00%) | 0.00%   | 12.00 | 00:05:04 | 0.00% | 0 (0.00%) | \$0.00 (0.00%) |
| 1138. | Diyomate A6                           | 1 (0.00%) | 100.00% | 1 (0.00%) | 100.00% | 1.00  | 00:00:00 | 0.00% | 0 (0.00%) | \$0.00 (0.00%) |
| 1139. | DoCoMo F-02E Arrows X F-02E           | 1 (0.00%) | 100.00% | 1 (0.00%) | 0.00%   | 3.00  | 00:01:32 | 0.00% | 0 (0.00%) | \$0.00 (0.00%) |

|       |                                                    |           |         |           |         |       |          |       |           |                |
|-------|----------------------------------------------------|-----------|---------|-----------|---------|-------|----------|-------|-----------|----------------|
| 1140. | DoCoMo N-04D NEXT series MEDIAS LTE N-04D          | 1 (0.00%) | 100.00% | 1 (0.00%) | 100.00% | 1.00  | 00:00:00 | 0.00% | 0 (0.00%) | \$0.00 (0.00%) |
| 1141. | DoCoMo P-02E                                       | 1 (0.00%) | 100.00% | 1 (0.00%) | 100.00% | 1.00  | 00:00:00 | 0.00% | 0 (0.00%) | \$0.00 (0.00%) |
| 1142. | DoCoMo SH-04E Aquos Phone EX                       | 1 (0.00%) | 100.00% | 1 (0.00%) | 100.00% | 1.00  | 00:00:00 | 0.00% | 0 (0.00%) | \$0.00 (0.00%) |
| 1143. | DoCoMo SH-10C Aquos Phone sv                       | 1 (0.00%) | 100.00% | 1 (0.00%) | 100.00% | 1.00  | 00:00:00 | 0.00% | 0 (0.00%) | \$0.00 (0.00%) |
| 1144. | DoCoMo SO-04E Xperia A                             | 1 (0.00%) | 100.00% | 1 (0.00%) | 100.00% | 1.00  | 00:00:00 | 0.00% | 0 (0.00%) | \$0.00 (0.00%) |
| 1145. | DoCoMo T-02D Regza T-02D                           | 1 (0.00%) | 100.00% | 1 (0.00%) | 100.00% | 1.00  | 00:00:00 | 0.00% | 0 (0.00%) | \$0.00 (0.00%) |
| 1146. | Elocity A7 A7 Internet Tablet                      | 1 (0.00%) | 100.00% | 1 (0.00%) | 0.00%   | 11.00 | 00:02:09 | 0.00% | 0 (0.00%) | \$0.00 (0.00%) |
| 1147. | Elson Cynus T1                                     | 1 (0.00%) | 100.00% | 1 (0.00%) | 0.00%   | 3.00  | 00:00:39 | 0.00% | 0 (0.00%) | \$0.00 (0.00%) |
| 1148. | Feiteng GT-H9500                                   | 1 (0.00%) | 100.00% | 1 (0.00%) | 100.00% | 1.00  | 00:00:00 | 0.00% | 0 (0.00%) | \$0.00 (0.00%) |
| 1149. | Feiteng H7100                                      | 1 (0.00%) | 100.00% | 1 (0.00%) | 100.00% | 1.00  | 00:00:00 | 0.00% | 0 (0.00%) | \$0.00 (0.00%) |
| 1150. | Fuhu NABI2-NV7A Nabi 2                             | 1 (0.00%) | 100.00% | 1 (0.00%) | 100.00% | 1.00  | 00:00:00 | 0.00% | 0 (0.00%) | \$0.00 (0.00%) |
| 1151. | Fujitsu F-02E ARROWS X F-02E for DoCoMo            | 1 (0.00%) | 100.00% | 1 (0.00%) | 0.00%   | 2.00  | 00:01:26 | 0.00% | 0 (0.00%) | \$0.00 (0.00%) |
| 1152. | Fujitsu F-05D ARROWS X LTE F-05D for DoCoMo        | 1 (0.00%) | 100.00% | 1 (0.00%) | 100.00% | 1.00  | 00:00:00 | 0.00% | 0 (0.00%) | \$0.00 (0.00%) |
| 1153. | Fujitsu F-07D ARROWS u F-07D                       | 1 (0.00%) | 100.00% | 1 (0.00%) | 100.00% | 1.00  | 00:00:00 | 0.00% | 0 (0.00%) | \$0.00 (0.00%) |
| 1154. | Fujitsu IS12F ARROWS ES IS12F for KDDI             | 1 (0.00%) | 100.00% | 1 (0.00%) | 100.00% | 1.00  | 00:00:00 | 0.00% | 0 (0.00%) | \$0.00 (0.00%) |
| 1155. | Fujitsu T-01D REGZA Phone T-01D for DoCoMo         | 1 (0.00%) | 100.00% | 1 (0.00%) | 100.00% | 1.00  | 00:00:00 | 0.00% | 0 (0.00%) | \$0.00 (0.00%) |
| 1156. | Fujitsu Toshiba T-01D REGZA Phone T-01D for DoCoMo | 1 (0.00%) | 100.00% | 1 (0.00%) | 100.00% | 1.00  | 00:00:00 | 0.00% | 0 (0.00%) | \$0.00 (0.00%) |
| 1157. | Gionee GN708W                                      | 1 (0.00%) | 100.00% | 1 (0.00%) | 100.00% | 1.00  | 00:00:00 | 0.00% | 0 (0.00%) | \$0.00 (0.00%) |
| 1158. | Google Android App Engine                          | 1 (0.00%) | 100.00% | 1 (0.00%) | 100.00% | 1.00  | 00:00:00 | 0.00% | 0 (0.00%) | \$0.00 (0.00%) |
| 1159. | Hisense E926                                       | 1 (0.00%) | 100.00% | 1 (0.00%) | 100.00% | 1.00  | 00:00:00 | 0.00% | 0 (0.00%) | \$0.00 (0.00%) |
| 1160. | Hisense M470BSA Sero 7 Pro                         | 1 (0.00%) | 100.00% | 1 (0.00%) | 0.00%   | 16.00 | 00:04:57 | 0.00% | 0 (0.00%) | \$0.00 (0.00%) |
| 1161. | HTC 6500LVW One                                    | 1 (0.00%) | 100.00% | 1 (0.00%) | 100.00% | 1.00  | 00:00:00 | 0.00% | 0 (0.00%) | \$0.00 (0.00%) |
| 1162. | HTC A620m 8S                                       | 1 (0.00%) | 100.00% | 1 (0.00%) | 100.00% | 1.00  | 00:00:00 | 0.00% | 0 (0.00%) | \$0.00 (0.00%) |
| 1163. | HTC ADR6325 Merge                                  | 1 (0.00%) | 100.00% | 1 (0.00%) | 100.00% | 1.00  | 00:00:00 | 0.00% | 0 (0.00%) | \$0.00 (0.00%) |
| 1164. | HTC ADR6330 Rhyme                                  | 1 (0.00%) | 100.00% | 1 (0.00%) | 100.00% | 1.00  | 00:00:00 | 0.00% | 0 (0.00%) | \$0.00 (0.00%) |
| 1165. | HTC C525c One SV                                   | 1 (0.00%) | 100.00% | 1 (0.00%) | 100.00% | 1.00  | 00:00:00 | 0.00% | 0 (0.00%) | \$0.00 (0.00%) |
| 1166. | HTC Desire S                                       | 1 (0.00%) | 100.00% | 1 (0.00%) | 100.00% | 1.00  | 00:00:00 | 0.00% | 0 (0.00%) | \$0.00 (0.00%) |
| 1167. | HTC Hero                                           | 1 (0.00%) | 100.00% | 1 (0.00%) | 0.00%   | 4.00  | 00:05:45 | 0.00% | 0 (0.00%) | \$0.00 (0.00%) |

|       |                                         |           |         |           |         |      |          |       |           |                |
|-------|-----------------------------------------|-----------|---------|-----------|---------|------|----------|-------|-----------|----------------|
| 1168. | HTC HTC Desire HD                       | 1 (0.00%) | 100.00% | 1 (0.00%) | 100.00% | 1.00 | 00:00:00 | 0.00% | 0 (0.00%) | \$0.00 (0.00%) |
| 1169. | HTC HTC Desire SV                       | 1 (0.00%) | 100.00% | 1 (0.00%) | 100.00% | 1.00 | 00:00:00 | 0.00% | 0 (0.00%) | \$0.00 (0.00%) |
| 1170. | HTC ISW11HT EVO WiMAX ISW11HT for KDDI  | 1 (0.00%) | 100.00% | 1 (0.00%) | 100.00% | 1.00 | 00:00:00 | 0.00% | 0 (0.00%) | \$0.00 (0.00%) |
| 1171. | HTC ISW13HT HTC J ISW13HT for KDDI      | 1 (0.00%) | 100.00% | 1 (0.00%) | 100.00% | 1.00 | 00:00:00 | 0.00% | 0 (0.00%) | \$0.00 (0.00%) |
| 1172. | HTC Magic                               | 1 (0.00%) | 100.00% | 1 (0.00%) | 100.00% | 1.00 | 00:00:00 | 0.00% | 0 (0.00%) | \$0.00 (0.00%) |
| 1173. | HTC Panache 4C                          | 1 (0.00%) | 100.00% | 1 (0.00%) | 100.00% | 1.00 | 00:00:00 | 0.00% | 0 (0.00%) | \$0.00 (0.00%) |
| 1174. | HTC PB99400 Incredible                  | 1 (0.00%) | 100.00% | 1 (0.00%) | 100.00% | 1.00 | 00:00:00 | 0.00% | 0 (0.00%) | \$0.00 (0.00%) |
| 1175. | HTC PH06130 Status                      | 1 (0.00%) | 100.00% | 1 (0.00%) | 100.00% | 1.00 | 00:00:00 | 0.00% | 0 (0.00%) | \$0.00 (0.00%) |
| 1176. | HTC PM23300 Windows Phone 8X            | 1 (0.00%) | 100.00% | 1 (0.00%) | 0.00%   | 3.00 | 00:02:23 | 0.00% | 0 (0.00%) | \$0.00 (0.00%) |
| 1177. | HTC PM3511 One X+                       | 1 (0.00%) | 100.00% | 1 (0.00%) | 100.00% | 1.00 | 00:00:00 | 0.00% | 0 (0.00%) | \$0.00 (0.00%) |
| 1178. | HTC PN07120 One                         | 1 (0.00%) | 100.00% | 1 (0.00%) | 0.00%   | 9.00 | 00:03:48 | 0.00% | 0 (0.00%) | \$0.00 (0.00%) |
| 1179. | HTC PO58220 One mini                    | 1 (0.00%) | 100.00% | 1 (0.00%) | 100.00% | 1.00 | 00:00:00 | 0.00% | 0 (0.00%) | \$0.00 (0.00%) |
| 1180. | HTC Radar                               | 1 (0.00%) | 100.00% | 1 (0.00%) | 100.00% | 1.00 | 00:00:00 | 0.00% | 0 (0.00%) | \$0.00 (0.00%) |
| 1181. | HTC T120C One V                         | 1 (0.00%) | 100.00% | 1 (0.00%) | 100.00% | 1.00 | 00:00:00 | 0.00% | 0 (0.00%) | \$0.00 (0.00%) |
| 1182. | HTC T320e One V                         | 1 (0.00%) | 100.00% | 1 (0.00%) | 100.00% | 1.00 | 00:00:00 | 0.00% | 0 (0.00%) | \$0.00 (0.00%) |
| 1183. | HTC T528t One ST                        | 1 (0.00%) | 100.00% | 1 (0.00%) | 100.00% | 1.00 | 00:00:00 | 0.00% | 0 (0.00%) | \$0.00 (0.00%) |
| 1184. | HTC T8788 Surround                      | 1 (0.00%) | 100.00% | 1 (0.00%) | 100.00% | 1.00 | 00:00:00 | 0.00% | 0 (0.00%) | \$0.00 (0.00%) |
| 1185. | HTC Windows Phone 8X for Orange         | 1 (0.00%) | 100.00% | 1 (0.00%) | 100.00% | 1.00 | 00:00:00 | 0.00% | 0 (0.00%) | \$0.00 (0.00%) |
| 1186. | HTC X315b Sensation XL with Beats Audio | 1 (0.00%) | 100.00% | 1 (0.00%) | 0.00%   | 2.00 | 00:00:23 | 0.00% | 0 (0.00%) | \$0.00 (0.00%) |
| 1187. | Huawei 4Afrika                          | 1 (0.00%) | 100.00% | 1 (0.00%) | 0.00%   | 3.00 | 00:02:07 | 0.00% | 0 (0.00%) | \$0.00 (0.00%) |
| 1188. | Huawei C8650                            | 1 (0.00%) | 100.00% | 1 (0.00%) | 100.00% | 1.00 | 00:00:00 | 0.00% | 0 (0.00%) | \$0.00 (0.00%) |
| 1189. | Huawei C8812E Ascend C8812E             | 1 (0.00%) | 100.00% | 1 (0.00%) | 0.00%   | 2.00 | 00:00:50 | 0.00% | 0 (0.00%) | \$0.00 (0.00%) |
| 1190. | Huawei C8813Q                           | 1 (0.00%) | 100.00% | 1 (0.00%) | 0.00%   | 4.00 | 00:01:23 | 0.00% | 0 (0.00%) | \$0.00 (0.00%) |
| 1191. | Huawei C8815                            | 1 (0.00%) | 100.00% | 1 (0.00%) | 100.00% | 1.00 | 00:00:00 | 0.00% | 0 (0.00%) | \$0.00 (0.00%) |
| 1192. | Huawei Comet T-Mobile Comet             | 1 (0.00%) | 100.00% | 1 (0.00%) | 100.00% | 1.00 | 00:00:00 | 0.00% | 0 (0.00%) | \$0.00 (0.00%) |
| 1193. | Huawei G520-5000                        | 1 (0.00%) | 100.00% | 1 (0.00%) | 0.00%   | 5.00 | 00:02:36 | 0.00% | 0 (0.00%) | \$0.00 (0.00%) |
| 1194. | Huawei H883G                            | 1 (0.00%) | 100.00% | 1 (0.00%) | 0.00%   | 2.00 | 00:00:23 | 0.00% | 0 (0.00%) | \$0.00 (0.00%) |
| 1195. | Huawei HUAWEI U8815 Ascend G 300        | 1 (0.00%) | 100.00% | 1 (0.00%) | 100.00% | 1.00 | 00:00:00 | 0.00% | 0 (0.00%) | \$0.00 (0.00%) |
| 1196. | Huawei M660                             | 1 (0.00%) | 100.00% | 1 (0.00%) | 100.00% | 1.00 | 00:00:00 | 0.00% | 0 (0.00%) | \$0.00 (0.00%) |
| 1197. | Huawei M865 Ascend II                   | 1 (0.00%) | 100.00% | 1 (0.00%) | 0.00%   | 3.00 | 00:01:01 | 0.00% | 0 (0.00%) | \$0.00 (0.00%) |

|       |                                           |           |         |           |         |      |          |       |           |                |
|-------|-------------------------------------------|-----------|---------|-----------|---------|------|----------|-------|-----------|----------------|
| 1198. | Huawei M886 Glory                         | 1 (0.00%) | 100.00% | 1 (0.00%) | 0.00%   | 2.00 | 00:01:25 | 0.00% | 0 (0.00%) | \$0.00 (0.00%) |
| 1199. | Huawei S41HW Pocket WiFi S II for emobile | 1 (0.00%) | 100.00% | 1 (0.00%) | 100.00% | 1.00 | 00:00:00 | 0.00% | 0 (0.00%) | \$0.00 (0.00%) |
| 1200. | Huawei S7-103                             | 1 (0.00%) | 100.00% | 1 (0.00%) | 0.00%   | 4.00 | 00:03:16 | 0.00% | 0 (0.00%) | \$0.00 (0.00%) |
| 1201. | Huawei U8150 Ideos                        | 1 (0.00%) | 100.00% | 1 (0.00%) | 100.00% | 1.00 | 00:00:00 | 0.00% | 0 (0.00%) | \$0.00 (0.00%) |
| 1202. | Huawei U8650 Sonic                        | 1 (0.00%) | 100.00% | 1 (0.00%) | 0.00%   | 3.00 | 00:00:59 | 0.00% | 0 (0.00%) | \$0.00 (0.00%) |
| 1203. | Huawei U8655 Ascend Y200                  | 1 (0.00%) | 100.00% | 1 (0.00%) | 100.00% | 1.00 | 00:00:00 | 0.00% | 0 (0.00%) | \$0.00 (0.00%) |
| 1204. | Huawei U8666-1 Ascend Y201 Pro            | 1 (0.00%) | 100.00% | 1 (0.00%) | 100.00% | 1.00 | 00:00:00 | 0.00% | 0 (0.00%) | \$0.00 (0.00%) |
| 1205. | Huawei U8950-1 Ascend G600                | 1 (0.00%) | 100.00% | 1 (0.00%) | 100.00% | 1.00 | 00:00:00 | 0.00% | 0 (0.00%) | \$0.00 (0.00%) |
| 1206. | Huawei U9202L-1 Ascend P1                 | 1 (0.00%) | 100.00% | 1 (0.00%) | 100.00% | 1.00 | 00:00:00 | 0.00% | 0 (0.00%) | \$0.00 (0.00%) |
| 1207. | Huawei U9510E Honor 2                     | 1 (0.00%) | 100.00% | 1 (0.00%) | 0.00%   | 5.00 | 00:01:27 | 0.00% | 0 (0.00%) | \$0.00 (0.00%) |
| 1208. | Huawei Y210-2010 Ascend Y210              | 1 (0.00%) | 100.00% | 1 (0.00%) | 0.00%   | 2.00 | 00:00:18 | 0.00% | 0 (0.00%) | \$0.00 (0.00%) |
| 1209. | Huawei Y301-A1 Valiant                    | 1 (0.00%) | 100.00% | 1 (0.00%) | 100.00% | 1.00 | 00:00:00 | 0.00% | 0 (0.00%) | \$0.00 (0.00%) |
| 1210. | Huawei Y310-T10 Ascend Y 310              | 1 (0.00%) | 100.00% | 1 (0.00%) | 100.00% | 1.00 | 00:00:00 | 0.00% | 0 (0.00%) | \$0.00 (0.00%) |
| 1211. | Huawei Y511-U30                           | 1 (0.00%) | 100.00% | 1 (0.00%) | 0.00%   | 2.00 | 00:02:49 | 0.00% | 0 (0.00%) | \$0.00 (0.00%) |
| 1212. | Intex Aqua 3.2                            | 1 (0.00%) | 100.00% | 1 (0.00%) | 100.00% | 1.00 | 00:00:00 | 0.00% | 0 (0.00%) | \$0.00 (0.00%) |
| 1213. | Jiayu JY-G2                               | 1 (0.00%) | 100.00% | 1 (0.00%) | 0.00%   | 3.00 | 00:13:05 | 0.00% | 0 (0.00%) | \$0.00 (0.00%) |
| 1214. | K-Touch T619                              | 1 (0.00%) | 100.00% | 1 (0.00%) | 100.00% | 1.00 | 00:00:00 | 0.00% | 0 (0.00%) | \$0.00 (0.00%) |
| 1215. | K-Touch U81t                              | 1 (0.00%) | 100.00% | 1 (0.00%) | 100.00% | 1.00 | 00:00:00 | 0.00% | 0 (0.00%) | \$0.00 (0.00%) |
| 1216. | Karbonn A1+                               | 1 (0.00%) | 100.00% | 1 (0.00%) | 100.00% | 1.00 | 00:00:00 | 0.00% | 0 (0.00%) | \$0.00 (0.00%) |
| 1217. | Karbonn A2+                               | 1 (0.00%) | 100.00% | 1 (0.00%) | 0.00%   | 3.00 | 00:00:40 | 0.00% | 0 (0.00%) | \$0.00 (0.00%) |
| 1218. | Karbonn A4                                | 1 (0.00%) | 100.00% | 1 (0.00%) | 100.00% | 1.00 | 00:00:00 | 0.00% | 0 (0.00%) | \$0.00 (0.00%) |
| 1219. | Karbonn A7                                | 1 (0.00%) | 100.00% | 1 (0.00%) | 0.00%   | 4.00 | 00:01:42 | 0.00% | 0 (0.00%) | \$0.00 (0.00%) |
| 1220. | KDDI IS12S acro HD IS12S                  | 1 (0.00%) | 100.00% | 1 (0.00%) | 100.00% | 1.00 | 00:00:00 | 0.00% | 0 (0.00%) | \$0.00 (0.00%) |
| 1221. | KDDI KYL21 DIGNO S KYL21                  | 1 (0.00%) | 100.00% | 1 (0.00%) | 100.00% | 1.00 | 00:00:00 | 0.00% | 0 (0.00%) | \$0.00 (0.00%) |
| 1222. | KT Tech KM-S300 TAKE HD                   | 1 (0.00%) | 100.00% | 1 (0.00%) | 100.00% | 1.00 | 00:00:00 | 0.00% | 0 (0.00%) | \$0.00 (0.00%) |
| 1223. | Kyocera C5120 Milano                      | 1 (0.00%) | 100.00% | 1 (0.00%) | 100.00% | 1.00 | 00:00:00 | 0.00% | 0 (0.00%) | \$0.00 (0.00%) |
| 1224. | Kyocera M9300 Echo                        | 1 (0.00%) | 100.00% | 1 (0.00%) | 100.00% | 1.00 | 00:00:00 | 0.00% | 0 (0.00%) | \$0.00 (0.00%) |
| 1225. | Lava Iris 349                             | 1 (0.00%) | 100.00% | 1 (0.00%) | 100.00% | 1.00 | 00:00:00 | 0.00% | 0 (0.00%) | \$0.00 (0.00%) |
| 1226. | Le Pan II                                 | 1 (0.00%) | 100.00% | 1 (0.00%) | 0.00%   | 3.00 | 00:00:45 | 0.00% | 0 (0.00%) | \$0.00 (0.00%) |
| 1227. | Lenovo A2207 LePad A2207                  | 1 (0.00%) | 100.00% | 1 (0.00%) | 100.00% | 1.00 | 00:00:00 | 0.00% | 0 (0.00%) | \$0.00 (0.00%) |
| 1228. | Lenovo A60                                | 1 (0.00%) | 100.00% | 1 (0.00%) | 0.00%   | 4.00 | 00:13:11 | 0.00% | 0 (0.00%) | \$0.00 (0.00%) |
| 1229. | Lenovo A630T                              | 1 (0.00%) | 100.00% | 1 (0.00%) | 100.00% | 1.00 | 00:00:00 | 0.00% | 0 (0.00%) | \$0.00 (0.00%) |
| 1230. | Lenovo A660                               | 1 (0.00%) | 100.00% | 1 (0.00%) | 100.00% | 1.00 | 00:00:00 | 0.00% | 0 (0.00%) | \$0.00 (0.00%) |



|       |                             |           |         |           |         |      |          |       |           |                |
|-------|-----------------------------|-----------|---------|-----------|---------|------|----------|-------|-----------|----------------|
| 1263. | LG LG-KP570                 | 1 (0.00%) | 100.00% | 1 (0.00%) | 0.00%   | 9.00 | 00:16:10 | 0.00% | 0 (0.00%) | \$0.00 (0.00%) |
| 1264. | LG LG-P713 Optimus L7 II    | 1 (0.00%) | 100.00% | 1 (0.00%) | 0.00%   | 3.00 | 00:01:36 | 0.00% | 0 (0.00%) | \$0.00 (0.00%) |
| 1265. | LG LG/E988/V1.C             | 1 (0.00%) | 100.00% | 1 (0.00%) | 100.00% | 1.00 | 00:00:00 | 0.00% | 0 (0.00%) | \$0.00 (0.00%) |
| 1266. | LG LG/P875/V1.C             | 1 (0.00%) | 100.00% | 1 (0.00%) | 0.00%   | 3.00 | 00:01:10 | 0.00% | 0 (0.00%) | \$0.00 (0.00%) |
| 1267. | LG LS696 Optimus Elite      | 1 (0.00%) | 100.00% | 1 (0.00%) | 0.00%   | 3.00 | 00:04:04 | 0.00% | 0 (0.00%) | \$0.00 (0.00%) |
| 1268. | LG LS840 Viper 4G LTE       | 1 (0.00%) | 100.00% | 1 (0.00%) | 100.00% | 1.00 | 00:00:00 | 0.00% | 0 (0.00%) | \$0.00 (0.00%) |
| 1269. | LG LS855 Marquee            | 1 (0.00%) | 100.00% | 1 (0.00%) | 0.00%   | 4.00 | 00:02:46 | 0.00% | 0 (0.00%) | \$0.00 (0.00%) |
| 1270. | LG LW770 Optimus Regard     | 1 (0.00%) | 100.00% | 1 (0.00%) | 0.00%   | 2.00 | 00:02:11 | 0.00% | 0 (0.00%) | \$0.00 (0.00%) |
| 1271. | LG MS840 Connect 4G         | 1 (0.00%) | 100.00% | 1 (0.00%) | 0.00%   | 8.00 | 00:03:17 | 0.00% | 0 (0.00%) | \$0.00 (0.00%) |
| 1272. | LG MS910 Bryce              | 1 (0.00%) | 100.00% | 1 (0.00%) | 0.00%   | 4.00 | 00:02:00 | 0.00% | 0 (0.00%) | \$0.00 (0.00%) |
| 1273. | LG P505 Phoenix             | 1 (0.00%) | 100.00% | 1 (0.00%) | 100.00% | 1.00 | 00:00:00 | 0.00% | 0 (0.00%) | \$0.00 (0.00%) |
| 1274. | LG P698F Optimus Dual Sim   | 1 (0.00%) | 100.00% | 1 (0.00%) | 100.00% | 1.00 | 00:00:00 | 0.00% | 0 (0.00%) | \$0.00 (0.00%) |
| 1275. | LG P720 Optimus 3D Max      | 1 (0.00%) | 100.00% | 1 (0.00%) | 100.00% | 1.00 | 00:00:00 | 0.00% | 0 (0.00%) | \$0.00 (0.00%) |
| 1276. | LG P870 Escape              | 1 (0.00%) | 100.00% | 1 (0.00%) | 100.00% | 1.00 | 00:00:00 | 0.00% | 0 (0.00%) | \$0.00 (0.00%) |
| 1277. | LG P895 Optimus Vu          | 1 (0.00%) | 100.00% | 1 (0.00%) | 100.00% | 1.00 | 00:00:00 | 0.00% | 0 (0.00%) | \$0.00 (0.00%) |
| 1278. | LG P925 Thrill              | 1 (0.00%) | 100.00% | 1 (0.00%) | 100.00% | 1.00 | 00:00:00 | 0.00% | 0 (0.00%) | \$0.00 (0.00%) |
| 1279. | LG P936 Optimus LTE         | 1 (0.00%) | 100.00% | 1 (0.00%) | 100.00% | 1.00 | 00:00:00 | 0.00% | 0 (0.00%) | \$0.00 (0.00%) |
| 1280. | LG P990h Optimus 2X         | 1 (0.00%) | 100.00% | 1 (0.00%) | 100.00% | 1.00 | 00:00:00 | 0.00% | 0 (0.00%) | \$0.00 (0.00%) |
| 1281. | LG P999 T-Mobile G2x        | 1 (0.00%) | 100.00% | 1 (0.00%) | 100.00% | 1.00 | 00:00:00 | 0.00% | 0 (0.00%) | \$0.00 (0.00%) |
| 1282. | LG VM670 Optimus V          | 1 (0.00%) | 100.00% | 1 (0.00%) | 100.00% | 1.00 | 00:00:00 | 0.00% | 0 (0.00%) | \$0.00 (0.00%) |
| 1283. | LG VM696 Optimus Elite      | 1 (0.00%) | 100.00% | 1 (0.00%) | 100.00% | 1.00 | 00:00:00 | 0.00% | 0 (0.00%) | \$0.00 (0.00%) |
| 1284. | LG VM701 Optimus Slider     | 1 (0.00%) | 100.00% | 1 (0.00%) | 100.00% | 1.00 | 00:00:00 | 0.00% | 0 (0.00%) | \$0.00 (0.00%) |
| 1285. | LG VN271 Extravert          | 1 (0.00%) | 100.00% | 1 (0.00%) | 100.00% | 1.00 | 00:00:00 | 0.00% | 0 (0.00%) | \$0.00 (0.00%) |
| 1286. | LG VS410PP Optimus Zone     | 1 (0.00%) | 100.00% | 1 (0.00%) | 100.00% | 1.00 | 00:00:00 | 0.00% | 0 (0.00%) | \$0.00 (0.00%) |
| 1287. | LG VS660 Vortex             | 1 (0.00%) | 100.00% | 1 (0.00%) | 0.00%   | 2.00 | 00:03:22 | 0.00% | 0 (0.00%) | \$0.00 (0.00%) |
| 1288. | LG VS700 Enlighten          | 1 (0.00%) | 100.00% | 1 (0.00%) | 100.00% | 1.00 | 00:00:00 | 0.00% | 0 (0.00%) | \$0.00 (0.00%) |
| 1289. | LG VS870 4G Lucid 2         | 1 (0.00%) | 100.00% | 1 (0.00%) | 100.00% | 1.00 | 00:00:00 | 0.00% | 0 (0.00%) | \$0.00 (0.00%) |
| 1290. | Majestic TAB 17C            | 1 (0.00%) | 100.00% | 1 (0.00%) | 100.00% | 1.00 | 00:00:00 | 0.00% | 0 (0.00%) | \$0.00 (0.00%) |
| 1291. | Medion LIFETAB S9714        | 1 (0.00%) | 100.00% | 1 (0.00%) | 100.00% | 1.00 | 00:00:00 | 0.00% | 0 (0.00%) | \$0.00 (0.00%) |
| 1292. | Micromax A34                | 1 (0.00%) | 100.00% | 1 (0.00%) | 100.00% | 1.00 | 00:00:00 | 0.00% | 0 (0.00%) | \$0.00 (0.00%) |
| 1293. | Micromax A54 A54 Smarty 3.5 | 1 (0.00%) | 100.00% | 1 (0.00%) | 100.00% | 1.00 | 00:00:00 | 0.00% | 0 (0.00%) | \$0.00 (0.00%) |
| 1294. | Micromax A63 Canvas Fun     | 1 (0.00%) | 100.00% | 1 (0.00%) | 0.00%   | 5.00 | 00:03:42 | 0.00% | 0 (0.00%) | \$0.00 (0.00%) |
| 1295. | Micromax A65                | 1 (0.00%) | 100.00% | 1 (0.00%) | 100.00% | 1.00 | 00:00:00 | 0.00% | 0 (0.00%) | \$0.00 (0.00%) |

|       |                                       |           |         |           |         |      |          |       |           |                |
|-------|---------------------------------------|-----------|---------|-----------|---------|------|----------|-------|-----------|----------------|
| 1296. | Micromax A67 Bolt A67                 | 1 (0.00%) | 100.00% | 1 (0.00%) | 100.00% | 1.00 | 00:00:00 | 0.00% | 0 (0.00%) | \$0.00 (0.00%) |
| 1297. | Micromax A87 Ninja 4                  | 1 (0.00%) | 100.00% | 1 (0.00%) | 100.00% | 1.00 | 00:00:00 | 0.00% | 0 (0.00%) | \$0.00 (0.00%) |
| 1298. | Micromax A90s Superfone Pixel         | 1 (0.00%) | 100.00% | 1 (0.00%) | 100.00% | 1.00 | 00:00:00 | 0.00% | 0 (0.00%) | \$0.00 (0.00%) |
| 1299. | Micromax P275 Funbook Infinity P275   | 1 (0.00%) | 100.00% | 1 (0.00%) | 100.00% | 1.00 | 00:00:00 | 0.00% | 0 (0.00%) | \$0.00 (0.00%) |
| 1300. | Motorola EX430 MotoGO                 | 1 (0.00%) | 100.00% | 1 (0.00%) | 100.00% | 1.00 | 00:00:00 | 0.00% | 0 (0.00%) | \$0.00 (0.00%) |
| 1301. | Motorola MB200 Cliq                   | 1 (0.00%) | 100.00% | 1 (0.00%) | 100.00% | 1.00 | 00:00:00 | 0.00% | 0 (0.00%) | \$0.00 (0.00%) |
| 1302. | Motorola MB501 CLIQ XT                | 1 (0.00%) | 100.00% | 1 (0.00%) | 100.00% | 1.00 | 00:00:00 | 0.00% | 0 (0.00%) | \$0.00 (0.00%) |
| 1303. | Motorola MB502                        | 1 (0.00%) | 100.00% | 1 (0.00%) | 0.00%   | 3.00 | 00:01:29 | 0.00% | 0 (0.00%) | \$0.00 (0.00%) |
| 1304. | Motorola MB508 Sage                   | 1 (0.00%) | 100.00% | 1 (0.00%) | 0.00%   | 5.00 | 00:03:04 | 0.00% | 0 (0.00%) | \$0.00 (0.00%) |
| 1305. | Motorola MB511 Ruth                   | 1 (0.00%) | 100.00% | 1 (0.00%) | 0.00%   | 4.00 | 00:17:51 | 0.00% | 0 (0.00%) | \$0.00 (0.00%) |
| 1306. | Motorola MB867 Milestone X2           | 1 (0.00%) | 100.00% | 1 (0.00%) | 0.00%   | 5.00 | 00:06:24 | 0.00% | 0 (0.00%) | \$0.00 (0.00%) |
| 1307. | Motorola MZ607 Xoom 2 ME              | 1 (0.00%) | 100.00% | 1 (0.00%) | 100.00% | 1.00 | 00:00:00 | 0.00% | 0 (0.00%) | \$0.00 (0.00%) |
| 1308. | Motorola WX445 Ciena                  | 1 (0.00%) | 100.00% | 1 (0.00%) | 0.00%   | 2.00 | 00:00:25 | 0.00% | 0 (0.00%) | \$0.00 (0.00%) |
| 1309. | Motorola XT557 Defy XT                | 1 (0.00%) | 100.00% | 1 (0.00%) | 0.00%   | 3.00 | 00:00:49 | 0.00% | 0 (0.00%) | \$0.00 (0.00%) |
| 1310. | Motorola XT682 Atrix TV               | 1 (0.00%) | 100.00% | 1 (0.00%) | 0.00%   | 5.00 | 00:03:53 | 0.00% | 0 (0.00%) | \$0.00 (0.00%) |
| 1311. | Motorola XT882 MOTO XT882             | 1 (0.00%) | 100.00% | 1 (0.00%) | 100.00% | 1.00 | 00:00:00 | 0.00% | 0 (0.00%) | \$0.00 (0.00%) |
| 1312. | Motorola XT897 Photon Q 4G LTE        | 1 (0.00%) | 100.00% | 1 (0.00%) | 0.00%   | 3.00 | 00:00:24 | 0.00% | 0 (0.00%) | \$0.00 (0.00%) |
| 1313. | Motorola XT905 RAZR M 4G LTE          | 1 (0.00%) | 100.00% | 1 (0.00%) | 0.00%   | 3.00 | 00:00:40 | 0.00% | 0 (0.00%) | \$0.00 (0.00%) |
| 1314. | MTC 970H                              | 1 (0.00%) | 100.00% | 1 (0.00%) | 100.00% | 1.00 | 00:00:00 | 0.00% | 0 (0.00%) | \$0.00 (0.00%) |
| 1315. | NEC N-04C Medias N-04C for DoCoMo     | 1 (0.00%) | 100.00% | 1 (0.00%) | 100.00% | 1.00 | 00:00:00 | 0.00% | 0 (0.00%) | \$0.00 (0.00%) |
| 1316. | NEC N-04D MEDIAS LTE N-04D for DoCoMo | 1 (0.00%) | 100.00% | 1 (0.00%) | 100.00% | 1.00 | 00:00:00 | 0.00% | 0 (0.00%) | \$0.00 (0.00%) |
| 1317. | NEC N-06C Medias WP N-06C for DoCoMo  | 1 (0.00%) | 100.00% | 1 (0.00%) | 0.00%   | 8.00 | 00:02:06 | 0.00% | 0 (0.00%) | \$0.00 (0.00%) |
| 1318. | NEC N-06E MEDIAS X N-06E for DoCoMo   | 1 (0.00%) | 100.00% | 1 (0.00%) | 100.00% | 1.00 | 00:00:00 | 0.00% | 0 (0.00%) | \$0.00 (0.00%) |
| 1319. | Nextbook Next7P12                     | 1 (0.00%) | 100.00% | 1 (0.00%) | 100.00% | 1.00 | 00:00:00 | 0.00% | 0 (0.00%) | \$0.00 (0.00%) |
| 1320. | Nextbook Next7P12-8G                  | 1 (0.00%) | 100.00% | 1 (0.00%) | 100.00% | 1.00 | 00:00:00 | 0.00% | 0 (0.00%) | \$0.00 (0.00%) |
| 1321. | Nextbook NX008HD8G                    | 1 (0.00%) | 100.00% | 1 (0.00%) | 0.00%   | 3.00 | 00:00:04 | 0.00% | 0 (0.00%) | \$0.00 (0.00%) |
| 1322. | NGM Forward Prime                     | 1 (0.00%) | 100.00% | 1 (0.00%) | 100.00% | 1.00 | 00:00:00 | 0.00% | 0 (0.00%) | \$0.00 (0.00%) |
| 1323. | Nokia 109                             | 1 (0.00%) | 100.00% | 1 (0.00%) | 0.00%   | 3.00 | 00:03:06 | 0.00% | 0 (0.00%) | \$0.00 (0.00%) |
| 1324. | Nokia 208                             | 1 (0.00%) | 100.00% | 1 (0.00%) | 100.00% | 1.00 | 00:00:00 | 0.00% | 0 (0.00%) | \$0.00 (0.00%) |

|       |                                          |           |         |           |         |      |          |       |           |                |
|-------|------------------------------------------|-----------|---------|-----------|---------|------|----------|-------|-----------|----------------|
| 1325. | Nokia 208.3                              | 1 (0.00%) | 100.00% | 1 (0.00%) | 0.00%   | 2.00 | 00:01:24 | 0.00% | 0 (0.00%) | \$0.00 (0.00%) |
| 1326. | Nokia 5228                               | 1 (0.00%) | 100.00% | 1 (0.00%) | 100.00% | 1.00 | 00:00:00 | 0.00% | 0 (0.00%) | \$0.00 (0.00%) |
| 1327. | Nokia 5232                               | 1 (0.00%) | 100.00% | 1 (0.00%) | 100.00% | 1.00 | 00:00:00 | 0.00% | 0 (0.00%) | \$0.00 (0.00%) |
| 1328. | Nokia 5236                               | 1 (0.00%) | 100.00% | 1 (0.00%) | 100.00% | 1.00 | 00:00:00 | 0.00% | 0 (0.00%) | \$0.00 (0.00%) |
| 1329. | Nokia 5238                               | 1 (0.00%) | 100.00% | 1 (0.00%) | 100.00% | 1.00 | 00:00:00 | 0.00% | 0 (0.00%) | \$0.00 (0.00%) |
| 1330. | Nokia 6700 classic                       | 1 (0.00%) | 100.00% | 1 (0.00%) | 0.00%   | 2.00 | 00:01:17 | 0.00% | 0 (0.00%) | \$0.00 (0.00%) |
| 1331. | Nokia 6790 Slide                         | 1 (0.00%) | 100.00% | 1 (0.00%) | 100.00% | 1.00 | 00:00:00 | 0.00% | 0 (0.00%) | \$0.00 (0.00%) |
| 1332. | Nokia 7310 Supernova                     | 1 (0.00%) | 100.00% | 1 (0.00%) | 100.00% | 1.00 | 00:00:00 | 0.00% | 0 (0.00%) | \$0.00 (0.00%) |
| 1333. | Nokia 808 PureView                       | 1 (0.00%) | 100.00% | 1 (0.00%) | 100.00% | 1.00 | 00:00:00 | 0.00% | 0 (0.00%) | \$0.00 (0.00%) |
| 1334. | Nokia Asha 210                           | 1 (0.00%) | 100.00% | 1 (0.00%) | 100.00% | 1.00 | 00:00:00 | 0.00% | 0 (0.00%) | \$0.00 (0.00%) |
| 1335. | Nokia Asha 230 DualSIM                   | 1 (0.00%) | 100.00% | 1 (0.00%) | 100.00% | 1.00 | 00:00:00 | 0.00% | 0 (0.00%) | \$0.00 (0.00%) |
| 1336. | Nokia E75 E75                            | 1 (0.00%) | 100.00% | 1 (0.00%) | 0.00%   | 5.00 | 00:01:46 | 0.00% | 0 (0.00%) | \$0.00 (0.00%) |
| 1337. | Nokia E90 Communicator Communicator      | 1 (0.00%) | 100.00% | 1 (0.00%) | 100.00% | 1.00 | 00:00:00 | 0.00% | 0 (0.00%) | \$0.00 (0.00%) |
| 1338. | Nokia N-Gage QD                          | 1 (0.00%) | 100.00% | 1 (0.00%) | 100.00% | 1.00 | 00:00:00 | 0.00% | 0 (0.00%) | \$0.00 (0.00%) |
| 1339. | Nokia N72                                | 1 (0.00%) | 100.00% | 1 (0.00%) | 100.00% | 1.00 | 00:00:00 | 0.00% | 0 (0.00%) | \$0.00 (0.00%) |
| 1340. | Nokia N79                                | 1 (0.00%) | 100.00% | 1 (0.00%) | 100.00% | 1.00 | 00:00:00 | 0.00% | 0 (0.00%) | \$0.00 (0.00%) |
| 1341. | Nokia N82                                | 1 (0.00%) | 100.00% | 1 (0.00%) | 0.00%   | 2.00 | 00:00:43 | 0.00% | 0 (0.00%) | \$0.00 (0.00%) |
| 1342. | Nokia N95 8GB                            | 1 (0.00%) | 100.00% | 1 (0.00%) | 100.00% | 1.00 | 00:00:00 | 0.00% | 0 (0.00%) | \$0.00 (0.00%) |
| 1343. | Nokia N95-3 NAM                          | 1 (0.00%) | 100.00% | 1 (0.00%) | 100.00% | 1.00 | 00:00:00 | 0.00% | 0 (0.00%) | \$0.00 (0.00%) |
| 1344. | Nokia N97 mini                           | 1 (0.00%) | 100.00% | 1 (0.00%) | 100.00% | 1.00 | 00:00:00 | 0.00% | 0 (0.00%) | \$0.00 (0.00%) |
| 1345. | Nokia X3-00                              | 1 (0.00%) | 100.00% | 1 (0.00%) | 0.00%   | 2.00 | 00:00:41 | 0.00% | 0 (0.00%) | \$0.00 (0.00%) |
| 1346. | Nokia X5-01                              | 1 (0.00%) | 100.00% | 1 (0.00%) | 100.00% | 1.00 | 00:00:00 | 0.00% | 0 (0.00%) | \$0.00 (0.00%) |
| 1347. | Odys Xpress                              | 1 (0.00%) | 100.00% | 1 (0.00%) | 0.00%   | 3.00 | 00:00:28 | 0.00% | 0 (0.00%) | \$0.00 (0.00%) |
| 1348. | Olivetti OliPad 100                      | 1 (0.00%) | 100.00% | 1 (0.00%) | 100.00% | 1.00 | 00:00:00 | 0.00% | 0 (0.00%) | \$0.00 (0.00%) |
| 1349. | Olivetti OliPad 110                      | 1 (0.00%) | 100.00% | 1 (0.00%) | 100.00% | 1.00 | 00:00:00 | 0.00% | 0 (0.00%) | \$0.00 (0.00%) |
| 1350. | Oppo R815T                               | 1 (0.00%) | 100.00% | 1 (0.00%) | 100.00% | 1.00 | 00:00:00 | 0.00% | 0 (0.00%) | \$0.00 (0.00%) |
| 1351. | Oppo R833T                               | 1 (0.00%) | 100.00% | 1 (0.00%) | 100.00% | 1.00 | 00:00:00 | 0.00% | 0 (0.00%) | \$0.00 (0.00%) |
| 1352. | Orange G740-L00 Yumo                     | 1 (0.00%) | 100.00% | 1 (0.00%) | 100.00% | 1.00 | 00:00:00 | 0.00% | 0 (0.00%) | \$0.00 (0.00%) |
| 1353. | Panasonic P-03E ELUGA P P-03E for DoCoMo | 1 (0.00%) | 100.00% | 1 (0.00%) | 100.00% | 1.00 | 00:00:00 | 0.00% | 0 (0.00%) | \$0.00 (0.00%) |
| 1354. | Pantech IM-A830L Vega Racer 2            | 1 (0.00%) | 100.00% | 1 (0.00%) | 0.00%   | 2.00 | 00:00:47 | 0.00% | 0 (0.00%) | \$0.00 (0.00%) |
| 1355. | Pantech IM-A860S Vega No 6               | 1 (0.00%) | 100.00% | 1 (0.00%) | 100.00% | 1.00 | 00:00:00 | 0.00% | 0 (0.00%) | \$0.00 (0.00%) |
| 1356. | Pantech IM-A880S Vega LTE-A              | 1 (0.00%) | 100.00% | 1 (0.00%) | 100.00% | 1.00 | 00:00:00 | 0.00% | 0 (0.00%) | \$0.00 (0.00%) |
| 1357. | PendoPad PNDPP4MT9G2 4.0 Multi-Touch     | 1 (0.00%) | 100.00% | 1 (0.00%) | 100.00% | 1.00 | 00:00:00 | 0.00% | 0 (0.00%) | \$0.00 (0.00%) |



| 9.7   |                                               | Count     | Percentage | Count     | Percentage | Count | Duration | Percentage | Count     | Percentage     |
|-------|-----------------------------------------------|-----------|------------|-----------|------------|-------|----------|------------|-----------|----------------|
| 1358. | Pioneer E80w                                  | 1 (0.00%) | 100.00%    | 1 (0.00%) | 100.00%    | 1.00  | 00:00:00 | 0.00%      | 0 (0.00%) | \$0.00 (0.00%) |
| 1359. | PROSCAN PLT7223G                              | 1 (0.00%) | 100.00%    | 1 (0.00%) | 100.00%    | 1.00  | 00:00:00 | 0.00%      | 0 (0.00%) | \$0.00 (0.00%) |
| 1360. | QMobile A8 Noir A8                            | 1 (0.00%) | 100.00%    | 1 (0.00%) | 0.00%      | 3.00  | 00:02:38 | 0.00%      | 0 (0.00%) | \$0.00 (0.00%) |
| 1361. | RCA RCT6378W2                                 | 1 (0.00%) | 100.00%    | 1 (0.00%) | 100.00%    | 1.00  | 00:00:00 | 0.00%      | 0 (0.00%) | \$0.00 (0.00%) |
| 1362. | RIM Q10                                       | 1 (0.00%) | 100.00%    | 1 (0.00%) | 0.00%      | 2.00  | 00:01:45 | 0.00%      | 0 (0.00%) | \$0.00 (0.00%) |
| 1363. | Samsung C5212                                 | 1 (0.00%) | 100.00%    | 1 (0.00%) | 100.00%    | 1.00  | 00:00:00 | 0.00%      | 0 (0.00%) | \$0.00 (0.00%) |
| 1364. | Samsung EK-GC100 Galaxy Camera                | 1 (0.00%) | 100.00%    | 1 (0.00%) | 0.00%      | 9.00  | 00:01:09 | 0.00%      | 0 (0.00%) | \$0.00 (0.00%) |
| 1365. | Samsung GP-P6810 Galaxy Tab 7.7               | 1 (0.00%) | 100.00%    | 1 (0.00%) | 100.00%    | 1.00  | 00:00:00 | 0.00%      | 0 (0.00%) | \$0.00 (0.00%) |
| 1366. | Samsung GT I9000T Galaxy S                    | 1 (0.00%) | 100.00%    | 1 (0.00%) | 100.00%    | 1.00  | 00:00:00 | 0.00%      | 0 (0.00%) | \$0.00 (0.00%) |
| 1367. | Samsung GT-3770 Champ 3.5G                    | 1 (0.00%) | 100.00%    | 1 (0.00%) | 100.00%    | 1.00  | 00:00:00 | 0.00%      | 0 (0.00%) | \$0.00 (0.00%) |
| 1368. | Samsung GT-3770M Champ 3.5G                   | 1 (0.00%) | 100.00%    | 1 (0.00%) | 0.00%      | 2.00  | 00:01:10 | 0.00%      | 0 (0.00%) | \$0.00 (0.00%) |
| 1369. | Samsung GT-C3330                              | 1 (0.00%) | 100.00%    | 1 (0.00%) | 100.00%    | 1.00  | 00:00:00 | 0.00%      | 0 (0.00%) | \$0.00 (0.00%) |
| 1370. | Samsung GT-E3300L Manhattan                   | 1 (0.00%) | 100.00%    | 1 (0.00%) | 100.00%    | 1.00  | 00:00:00 | 0.00%      | 0 (0.00%) | \$0.00 (0.00%) |
| 1371. | Samsung GT-I5500L                             | 1 (0.00%) | 100.00%    | 1 (0.00%) | 0.00%      | 2.00  | 00:00:21 | 0.00%      | 0 (0.00%) | \$0.00 (0.00%) |
| 1372. | Samsung GT-I5510                              | 1 (0.00%) | 100.00%    | 1 (0.00%) | 100.00%    | 1.00  | 00:00:00 | 0.00%      | 0 (0.00%) | \$0.00 (0.00%) |
| 1373. | Samsung GT-I5510T                             | 1 (0.00%) | 100.00%    | 1 (0.00%) | 100.00%    | 1.00  | 00:00:00 | 0.00%      | 0 (0.00%) | \$0.00 (0.00%) |
| 1374. | Samsung GT-I5801 Galaxy Apollo                | 1 (0.00%) | 100.00%    | 1 (0.00%) | 100.00%    | 1.00  | 00:00:00 | 0.00%      | 0 (0.00%) | \$0.00 (0.00%) |
| 1375. | Samsung GT-I9000 Galaxy S/Vibrant             | 1 (0.00%) | 100.00%    | 1 (0.00%) | 100.00%    | 1.00  | 00:00:00 | 0.00%      | 0 (0.00%) | \$0.00 (0.00%) |
| 1376. | Samsung GT-I9100M Galaxy S II                 | 1 (0.00%) | 100.00%    | 1 (0.00%) | 0.00%      | 3.00  | 00:00:21 | 0.00%      | 0 (0.00%) | \$0.00 (0.00%) |
| 1377. | Samsung GT-I9150 Galaxy Mega 5.8              | 1 (0.00%) | 100.00%    | 1 (0.00%) | 100.00%    | 1.00  | 00:00:00 | 0.00%      | 0 (0.00%) | \$0.00 (0.00%) |
| 1378. | Samsung GT-I9210 Galaxy SII LTE               | 1 (0.00%) | 100.00%    | 1 (0.00%) | 0.00%      | 2.00  | 00:00:28 | 0.00%      | 0 (0.00%) | \$0.00 (0.00%) |
| 1379. | Samsung GT-I9220 Galaxy Note                  | 1 (0.00%) | 100.00%    | 1 (0.00%) | 100.00%    | 1.00  | 00:00:00 | 0.00%      | 0 (0.00%) | \$0.00 (0.00%) |
| 1380. | Samsung GT-I9305N Galaxy S3 LTE International | 1 (0.00%) | 100.00%    | 1 (0.00%) | 100.00%    | 1.00  | 00:00:00 | 0.00%      | 0 (0.00%) | \$0.00 (0.00%) |
| 1381. | Samsung GT-I9308 Galaxy S III                 | 1 (0.00%) | 100.00%    | 1 (0.00%) | 100.00%    | 1.00  | 00:00:00 | 0.00%      | 0 (0.00%) | \$0.00 (0.00%) |
| 1382. | Samsung GT-I9508 Galaxy S IV                  | 1 (0.00%) | 100.00%    | 1 (0.00%) | 100.00%    | 1.00  | 00:00:00 | 0.00%      | 0 (0.00%) | \$0.00 (0.00%) |

|       |                                             |           |         |           |         |      |          |       |           |                |
|-------|---------------------------------------------|-----------|---------|-----------|---------|------|----------|-------|-----------|----------------|
| 1383. | Samsung GT-P1000T Galaxy Tab                | 1 (0.00%) | 100.00% | 1 (0.00%) | 0.00%   | 8.00 | 00:12:38 | 0.00% | 0 (0.00%) | \$0.00 (0.00%) |
| 1384. | Samsung GT-P3100B Galaxy Tab 2 7.0          | 1 (0.00%) | 100.00% | 1 (0.00%) | 100.00% | 1.00 | 00:00:00 | 0.00% | 0 (0.00%) | \$0.00 (0.00%) |
| 1385. | Samsung GT-S5250 Wave 2                     | 1 (0.00%) | 100.00% | 1 (0.00%) | 100.00% | 1.00 | 00:00:00 | 0.00% | 0 (0.00%) | \$0.00 (0.00%) |
| 1386. | Samsung GT-S5260 Star II                    | 1 (0.00%) | 100.00% | 1 (0.00%) | 100.00% | 1.00 | 00:00:00 | 0.00% | 0 (0.00%) | \$0.00 (0.00%) |
| 1387. | Samsung GT-S5270K Chat                      | 1 (0.00%) | 100.00% | 1 (0.00%) | 100.00% | 1.00 | 00:00:00 | 0.00% | 0 (0.00%) | \$0.00 (0.00%) |
| 1388. | Samsung GT-S5280 Galaxy Star                | 1 (0.00%) | 100.00% | 1 (0.00%) | 100.00% | 1.00 | 00:00:00 | 0.00% | 0 (0.00%) | \$0.00 (0.00%) |
| 1389. | Samsung GT-S5310 Galaxy Pocket Neo          | 1 (0.00%) | 100.00% | 1 (0.00%) | 100.00% | 1.00 | 00:00:00 | 0.00% | 0 (0.00%) | \$0.00 (0.00%) |
| 1390. | Samsung GT-S5312B Galaxy Pocket Neo         | 1 (0.00%) | 100.00% | 1 (0.00%) | 0.00%   | 2.00 | 00:00:58 | 0.00% | 0 (0.00%) | \$0.00 (0.00%) |
| 1391. | Samsung GT-S5330                            | 1 (0.00%) | 100.00% | 1 (0.00%) | 100.00% | 1.00 | 00:00:00 | 0.00% | 0 (0.00%) | \$0.00 (0.00%) |
| 1392. | Samsung GT-S5380K Wave Y                    | 1 (0.00%) | 100.00% | 1 (0.00%) | 100.00% | 1.00 | 00:00:00 | 0.00% | 0 (0.00%) | \$0.00 (0.00%) |
| 1393. | Samsung GT-S5670B Galaxy Fit                | 1 (0.00%) | 100.00% | 1 (0.00%) | 0.00%   | 2.00 | 00:00:59 | 0.00% | 0 (0.00%) | \$0.00 (0.00%) |
| 1394. | Samsung GT-S6500T Galaxy Mini 2             | 1 (0.00%) | 100.00% | 1 (0.00%) | 100.00% | 1.00 | 00:00:00 | 0.00% | 0 (0.00%) | \$0.00 (0.00%) |
| 1395. | Samsung GT-S7272 Galaxy Ace 3               | 1 (0.00%) | 100.00% | 1 (0.00%) | 0.00%   | 3.00 | 00:03:01 | 0.00% | 0 (0.00%) | \$0.00 (0.00%) |
| 1396. | Samsung GT-S7273T Galaxy SII TV             | 1 (0.00%) | 100.00% | 1 (0.00%) | 100.00% | 1.00 | 00:00:00 | 0.00% | 0 (0.00%) | \$0.00 (0.00%) |
| 1397. | Samsung GT-S7530E Omnia M                   | 1 (0.00%) | 100.00% | 1 (0.00%) | 0.00%   | 3.00 | 00:00:41 | 0.00% | 0 (0.00%) | \$0.00 (0.00%) |
| 1398. | Samsung GT-S7568 Galaxy S Duos              | 1 (0.00%) | 100.00% | 1 (0.00%) | 100.00% | 1.00 | 00:00:00 | 0.00% | 0 (0.00%) | \$0.00 (0.00%) |
| 1399. | Samsung GT-S8530 Wave 2                     | 1 (0.00%) | 100.00% | 1 (0.00%) | 100.00% | 1.00 | 00:00:00 | 0.00% | 0 (0.00%) | \$0.00 (0.00%) |
| 1400. | Samsung S3330 Ch@t                          | 1 (0.00%) | 100.00% | 1 (0.00%) | 100.00% | 1.00 | 00:00:00 | 0.00% | 0 (0.00%) | \$0.00 (0.00%) |
| 1401. | Samsung S5753E                              | 1 (0.00%) | 100.00% | 1 (0.00%) | 100.00% | 1.00 | 00:00:00 | 0.00% | 0 (0.00%) | \$0.00 (0.00%) |
| 1402. | Samsung SC-01C Galaxy Tab SC-01C for DoCoMo | 1 (0.00%) | 100.00% | 1 (0.00%) | 100.00% | 1.00 | 00:00:00 | 0.00% | 0 (0.00%) | \$0.00 (0.00%) |
| 1403. | Samsung SC-02E                              | 1 (0.00%) | 100.00% | 1 (0.00%) | 0.00%   | 2.00 | 00:00:11 | 0.00% | 0 (0.00%) | \$0.00 (0.00%) |
| 1404. | Samsung SC-02E Galaxy Note II               | 1 (0.00%) | 100.00% | 1 (0.00%) | 100.00% | 1.00 | 00:00:00 | 0.00% | 0 (0.00%) | \$0.00 (0.00%) |
| 1405. | Samsung SC-02F GALAXY J SC-02F for DoCoMo   | 1 (0.00%) | 100.00% | 1 (0.00%) | 100.00% | 1.00 | 00:00:00 | 0.00% | 0 (0.00%) | \$0.00 (0.00%) |
| 1406. | Samsung SCH I869                            | 1 (0.00%) | 100.00% | 1 (0.00%) | 100.00% | 1.00 | 00:00:00 | 0.00% | 0 (0.00%) | \$0.00 (0.00%) |
| 1407. | Samsung SCH-i110 Illusion                   | 1 (0.00%) | 100.00% | 1 (0.00%) | 100.00% | 1.00 | 00:00:00 | 0.00% | 0 (0.00%) | \$0.00 (0.00%) |



|       |                                              |           |         |           |         |       |          |       |           |                |
|-------|----------------------------------------------|-----------|---------|-----------|---------|-------|----------|-------|-----------|----------------|
| 1432. | E210K Galaxy SIII                            | 1 (0.00%) | 0.00%   | 0 (0.00%) | 0.00%   | 11.00 | 00:03:02 | 0.00% | 0 (0.00%) | \$0.00 (0.00%) |
| 1433. | Samsung SHV-E220S Galaxy Pop                 | 1 (0.00%) | 100.00% | 1 (0.00%) | 100.00% | 1.00  | 00:00:00 | 0.00% | 0 (0.00%) | \$0.00 (0.00%) |
| 1434. | Samsung SHV-E250L Galaxy Note II             | 1 (0.00%) | 100.00% | 1 (0.00%) | 100.00% | 1.00  | 00:00:00 | 0.00% | 0 (0.00%) | \$0.00 (0.00%) |
| 1435. | Samsung SHV-E300K Galaxy S IV                | 1 (0.00%) | 100.00% | 1 (0.00%) | 100.00% | 1.00  | 00:00:00 | 0.00% | 0 (0.00%) | \$0.00 (0.00%) |
| 1436. | Samsung SHV-E300S Galaxy S IV                | 1 (0.00%) | 100.00% | 1 (0.00%) | 100.00% | 1.00  | 00:00:00 | 0.00% | 0 (0.00%) | \$0.00 (0.00%) |
| 1437. | Samsung SHV-E310S Galaxy Mega 6.3            | 1 (0.00%) | 100.00% | 1 (0.00%) | 100.00% | 1.00  | 00:00:00 | 0.00% | 0 (0.00%) | \$0.00 (0.00%) |
| 1438. | Samsung SHW-M110S Galaxy S                   | 1 (0.00%) | 100.00% | 1 (0.00%) | 0.00%   | 9.00  | 00:03:50 | 0.00% | 0 (0.00%) | \$0.00 (0.00%) |
| 1439. | Samsung SHW-M250L GALAXY S II (LG U+)        | 1 (0.00%) | 100.00% | 1 (0.00%) | 0.00%   | 2.00  | 00:00:27 | 0.00% | 0 (0.00%) | \$0.00 (0.00%) |
| 1440. | Samsung SHW-M380S Galaxy Tab 10.1            | 1 (0.00%) | 0.00%   | 0 (0.00%) | 100.00% | 1.00  | 00:00:00 | 0.00% | 0 (0.00%) | \$0.00 (0.00%) |
| 1441. | Samsung SHW-M440S Galaxy S III               | 1 (0.00%) | 0.00%   | 0 (0.00%) | 0.00%   | 7.00  | 00:10:25 | 0.00% | 0 (0.00%) | \$0.00 (0.00%) |
| 1442. | Samsung SM-G900H Galaxy S5                   | 1 (0.00%) | 100.00% | 1 (0.00%) | 100.00% | 1.00  | 00:00:00 | 0.00% | 0 (0.00%) | \$0.00 (0.00%) |
| 1443. | Samsung SM-G900S Galaxy S5                   | 1 (0.00%) | 100.00% | 1 (0.00%) | 0.00%   | 5.00  | 00:01:39 | 0.00% | 0 (0.00%) | \$0.00 (0.00%) |
| 1444. | Samsung SM-N900S Galaxy Note 3               | 1 (0.00%) | 100.00% | 1 (0.00%) | 100.00% | 1.00  | 00:00:00 | 0.00% | 0 (0.00%) | \$0.00 (0.00%) |
| 1445. | Samsung SPH-M580 Replenish                   | 1 (0.00%) | 100.00% | 1 (0.00%) | 100.00% | 1.00  | 00:00:00 | 0.00% | 0 (0.00%) | \$0.00 (0.00%) |
| 1446. | Samsung SPH-M910 Intercept                   | 1 (0.00%) | 100.00% | 1 (0.00%) | 100.00% | 1.00  | 00:00:00 | 0.00% | 0 (0.00%) | \$0.00 (0.00%) |
| 1447. | Sanei N10-QM                                 | 1 (0.00%) | 100.00% | 1 (0.00%) | 0.00%   | 7.00  | 00:13:07 | 0.00% | 0 (0.00%) | \$0.00 (0.00%) |
| 1448. | Sharp 007SH AQUOS Phone                      | 1 (0.00%) | 100.00% | 1 (0.00%) | 100.00% | 1.00  | 00:00:00 | 0.00% | 0 (0.00%) | \$0.00 (0.00%) |
| 1449. | Sharp 204SH                                  | 1 (0.00%) | 100.00% | 1 (0.00%) | 100.00% | 1.00  | 00:00:00 | 0.00% | 0 (0.00%) | \$0.00 (0.00%) |
| 1450. | Sharp ADS1 FX Plus                           | 1 (0.00%) | 100.00% | 1 (0.00%) | 100.00% | 1.00  | 00:00:00 | 0.00% | 0 (0.00%) | \$0.00 (0.00%) |
| 1451. | Sharp IS03 IS03 for KDDI                     | 1 (0.00%) | 100.00% | 1 (0.00%) | 100.00% | 1.00  | 00:00:00 | 0.00% | 0 (0.00%) | \$0.00 (0.00%) |
| 1452. | Sharp IS11SH AQUOS PHONE IS11SH for KDDI     | 1 (0.00%) | 100.00% | 1 (0.00%) | 100.00% | 1.00  | 00:00:00 | 0.00% | 0 (0.00%) | \$0.00 (0.00%) |
| 1453. | Sharp SH-13C AQUOS PHONE f SH-13C for DoCoMo | 1 (0.00%) | 100.00% | 1 (0.00%) | 100.00% | 1.00  | 00:00:00 | 0.00% | 0 (0.00%) | \$0.00 (0.00%) |
| 1454. | Simvalley SPX-5 3G                           | 1 (0.00%) | 100.00% | 1 (0.00%) | 100.00% | 1.00  | 00:00:00 | 0.00% | 0 (0.00%) | \$0.00 (0.00%) |
| 1455. | Sky IM-A800S Vega LTE                        | 1 (0.00%) | 100.00% | 1 (0.00%) | 100.00% | 1.00  | 00:00:00 | 0.00% | 0 (0.00%) | \$0.00 (0.00%) |
| 1456. | Smartfren S7 AndroTab S7                     | 1 (0.00%) | 100.00% | 1 (0.00%) | 0.00%   | 3.00  | 00:03:36 | 0.00% | 0 (0.00%) | \$0.00 (0.00%) |
| 1457. | Softbank 001DL Dell Streak 5                 | 1 (0.00%) | 100.00% | 1 (0.00%) | 0.00%   | 3.00  | 00:00:23 | 0.00% | 0 (0.00%) | \$0.00 (0.00%) |



|       |                                      |           |         |           |         |      |          |       |           |                |
|-------|--------------------------------------|-----------|---------|-----------|---------|------|----------|-------|-----------|----------------|
| 1484. | T-Mobile G685 11 Prism               | 1 (0.00%) | 100.00% | 1 (0.00%) | 100.00% | 1.00 | 00:00:00 | 0.00% | 0 (0.00%) | \$0.00 (0.00%) |
| 1485. | TCL A510                             | 1 (0.00%) | 100.00% | 1 (0.00%) | 100.00% | 1.00 | 00:00:00 | 0.00% | 0 (0.00%) | \$0.00 (0.00%) |
| 1486. | Tecno P3                             | 1 (0.00%) | 100.00% | 1 (0.00%) | 100.00% | 1.00 | 00:00:00 | 0.00% | 0 (0.00%) | \$0.00 (0.00%) |
| 1487. | ThL W100                             | 1 (0.00%) | 0.00%   | 0 (0.00%) | 0.00%   | 6.00 | 00:01:46 | 0.00% | 0 (0.00%) | \$0.00 (0.00%) |
| 1488. | Toshiba AT10LE-A Excite Pro          | 1 (0.00%) | 100.00% | 1 (0.00%) | 100.00% | 1.00 | 00:00:00 | 0.00% | 0 (0.00%) | \$0.00 (0.00%) |
| 1489. | TrekStor ST701041 SurfTab Breeze 7.0 | 1 (0.00%) | 100.00% | 1 (0.00%) | 0.00%   | 7.00 | 00:03:47 | 0.00% | 0 (0.00%) | \$0.00 (0.00%) |
| 1490. | Turkcell T21 Max Plus 5              | 1 (0.00%) | 100.00% | 1 (0.00%) | 100.00% | 1.00 | 00:00:00 | 0.00% | 0 (0.00%) | \$0.00 (0.00%) |
| 1491. | Versus TouchPad 7                    | 1 (0.00%) | 100.00% | 1 (0.00%) | 100.00% | 1.00 | 00:00:00 | 0.00% | 0 (0.00%) | \$0.00 (0.00%) |
| 1492. | Vivo S6t                             | 1 (0.00%) | 100.00% | 1 (0.00%) | 100.00% | 1.00 | 00:00:00 | 0.00% | 0 (0.00%) | \$0.00 (0.00%) |
| 1493. | Vivo X510t                           | 1 (0.00%) | 100.00% | 1 (0.00%) | 100.00% | 1.00 | 00:00:00 | 0.00% | 0 (0.00%) | \$0.00 (0.00%) |
| 1494. | Vodafone Smart Tab 10                | 1 (0.00%) | 100.00% | 1 (0.00%) | 100.00% | 1.00 | 00:00:00 | 0.00% | 0 (0.00%) | \$0.00 (0.00%) |
| 1495. | Vodafone Smart Tab III 10            | 1 (0.00%) | 100.00% | 1 (0.00%) | 100.00% | 1.00 | 00:00:00 | 0.00% | 0 (0.00%) | \$0.00 (0.00%) |
| 1496. | Wiko Cink Peax                       | 1 (0.00%) | 100.00% | 1 (0.00%) | 100.00% | 1.00 | 00:00:00 | 0.00% | 0 (0.00%) | \$0.00 (0.00%) |
| 1497. | Wiko Cink Slim                       | 1 (0.00%) | 100.00% | 1 (0.00%) | 100.00% | 1.00 | 00:00:00 | 0.00% | 0 (0.00%) | \$0.00 (0.00%) |
| 1498. | Xiaomi MI 2A                         | 1 (0.00%) | 100.00% | 1 (0.00%) | 100.00% | 1.00 | 00:00:00 | 0.00% | 0 (0.00%) | \$0.00 (0.00%) |
| 1499. | Zopo C2                              | 1 (0.00%) | 0.00%   | 0 (0.00%) | 0.00%   | 3.00 | 00:00:41 | 0.00% | 0 (0.00%) | \$0.00 (0.00%) |
| 1500. | ZTE Blade                            | 1 (0.00%) | 100.00% | 1 (0.00%) | 100.00% | 1.00 | 00:00:00 | 0.00% | 0 (0.00%) | \$0.00 (0.00%) |
| 1501. | ZTE BM-LTBU300 Light Tab             | 1 (0.00%) | 100.00% | 1 (0.00%) | 100.00% | 1.00 | 00:00:00 | 0.00% | 0 (0.00%) | \$0.00 (0.00%) |
| 1502. | ZTE Corporation ZTE N855D            | 1 (0.00%) | 100.00% | 1 (0.00%) | 100.00% | 1.00 | 00:00:00 | 0.00% | 0 (0.00%) | \$0.00 (0.00%) |
| 1503. | ZTE N721 Personal Touch              | 1 (0.00%) | 100.00% | 1 (0.00%) | 0.00%   | 2.00 | 00:21:12 | 0.00% | 0 (0.00%) | \$0.00 (0.00%) |
| 1504. | ZTE Open                             | 1 (0.00%) | 100.00% | 1 (0.00%) | 0.00%   | 3.00 | 00:00:38 | 0.00% | 0 (0.00%) | \$0.00 (0.00%) |
| 1505. | ZTE TU812                            | 1 (0.00%) | 100.00% | 1 (0.00%) | 100.00% | 1.00 | 00:00:00 | 0.00% | 0 (0.00%) | \$0.00 (0.00%) |
| 1506. | ZTE V880 Blade                       | 1 (0.00%) | 100.00% | 1 (0.00%) | 100.00% | 1.00 | 00:00:00 | 0.00% | 0 (0.00%) | \$0.00 (0.00%) |
| 1507. | ZTE V889S                            | 1 (0.00%) | 100.00% | 1 (0.00%) | 100.00% | 1.00 | 00:00:00 | 0.00% | 0 (0.00%) | \$0.00 (0.00%) |
| 1508. | ZTE V967S                            | 1 (0.00%) | 100.00% | 1 (0.00%) | 100.00% | 1.00 | 00:00:00 | 0.00% | 0 (0.00%) | \$0.00 (0.00%) |
| 1509. | ZTE ZTE LEO Q1                       | 1 (0.00%) | 100.00% | 1 (0.00%) | 0.00%   | 4.00 | 00:03:21 | 0.00% | 0 (0.00%) | \$0.00 (0.00%) |
